# Supplementary material for: Global conservation status of the jawed vertebrate Tree of Life
Source: Research Square preprint supplement (doi:10.21203/rs.3.rs-2835356/v1), 2023-06-16
Supplement: Supplementary file 1 [file 7de1fae45921841fef0ccb50.xlsx]

## Sheet: Clade statistics
Clade	Spp no.	Threatened spp. no	Proportion thr spp.	prop. thr. spp. assessed	Total PD (MY)	Median TBL (MY)	Median ED (MY)	Median EDGE MY)	EDGE spp. no.	Median loss IUCN50 (MY)	Median loss IUCN500 (MY)	Median loss EDGE (MY)	Median pct loss IUCN50 (MY)	Median pct loss IUCN500 (MY)	Median pct loss EDGE (MY)
Turtles	351	161	45.8689	64.6586	6519.78	6.35132	9.0927	2.01556	96	1335.93	2244.18	1700.82	20.4472	34.4133	26.0422
Amphibs	8024	2323	28.9506	34.0167	142670	6.51986	8.58776	1.39942	926	20920.6	36912.8	24578.5	14.6913	25.8736	17.3518
Crocodilians	25	12	48	52.1739	612.602	9.35853	13.0106	2.83083	7	95.1988	136.728	125.295	15.6224	22.4074	20.5515
Lepidosaurs	10735	1220	11.3647	16.1077	134253	4.85727	6.09125	0.700343	621	17383.6	29981.4	20146.9	12.923	22.2912	15.0021
Sharks	1290	331	25.6589	29.292	41297.1	7.91828	11.0266	2.05029	75	5082.78	9174.71	6115.84	12.1878	22.0805	14.674
Fish	32760	2471	7.54274	16.2012	329935	2.67425	3.42866	0.440628	978	35372.1	60511.8	39370.3	10.7185	18.3467	11.9329
Mammals	6253	1295	20.7101	22.4904	37067.7	1.56429	1.98195	0.238131	643	2758.35	5171.9	3725.37	7.43978	13.9519	10.0387
Birds	10988	1483	13.4965	13.4965	89746.8	2.95379	3.21526	0.195317	696	2875.97	5405.3	6102.9	3.20487	6.00999	6.79134
All	70426	9296	13.1997	19.4465	782102	3.48952	4.24005	0.443895	4042	85824.5	149539	101866	10.9736	19.1201	13.0246

## Sheet: EDGE scores all species
RL.ID	Clade	Family	Species	RL.cat	TBL.median	ED.median	EDGE.median	EDGE.species	Lost.taxa	PossiblyExtinct.RL	NeedsUpdating	Popn.trend
41848	Chondrichthyes	Rhinidae	Rhina ancylostoma	CR	95.1414	97.8322	87.7867	YES	0	0	0	Decreasing
11575	Ray-finned fish	Lepidogalaxiidae	Lepidogalaxias salamandroides	EN	172.157	172.157	84.0223	YES	0	0	0	Decreasing
8070	Testudines	Podocnemididae	Erymnochelys madagascariensis	CR	82.1731	82.1831	76.3039	YES	0	0	1	Decreasing
18428	Ray-finned fish	Polyodontidae	Psephurus gladius	CR	63.1	76.9046	73.554	YES	0	1	1	Unknown
18584848	Chondrichthyes	Pristidae	Pristis pristis	CR	80.0959	82.6651	70.1901	YES	0	0	0	Decreasing
18457	Testudines	Chelidae	Pseudemydura umbrina	CR	69.4425	69.4425	64.5219	YES	0	0	1	NA
58075	Amphibians	Petropedetidae	Ericabatrachus baleensis	CR	70.1262	70.1262	63.7263	YES	0	0	0	Unknown
3898	Testudines	Carettochelyidae	Carettochelys insculpta	EN	118.821	118.821	59.4039	YES	0	0	0	Decreasing
172958	Lepidosaurs	Xenotyphlopidae	Xenotyphlops grandidieri	CR	64.9723	64.9723	58.9402	YES	0	0	0	Unknown
57946	Amphibians	Microhylidae	Parhoplophryne usambarica	CR	57.1817	63.8089	57.4447	YES	1	1	0	Unknown
39389	Chondrichthyes	Pristidae	Anoxypristis cuspidata	EN	119.837	120.048	54.4396	YES	0	0	0	Decreasing
22697536	Birds	Threskiornithidae	Thaumatibis gigantea	CR	58.2439	58.2439	54.2297	YES	0	0	0	Decreasing
57287221	Lepidosaurs	Shinisauridae	Shinisaurus crocodilurus	EN	111.34	111.34	53.8863	YES	0	0	0	Decreasing
6493	Testudines	Dermatemydidae	Dermatemys mawii	CR	56.1468	56.1468	52.2209	YES	0	0	1	Decreasing
57703	Amphibians	Brevicipitidae	Balebreviceps hillmani	CR	55.0444	55.0444	50.359	YES	0	0	0	Decreasing
18175	Chondrichthyes	Pristidae	Pristis pectinata	CR	48.4171	56.5485	49.9544	YES	0	0	0	Decreasing
39393	Chondrichthyes	Pristidae	Pristis zijsron	CR	46.3082	55.5638	48.7199	YES	0	0	0	Decreasing
22596	Ray-finned fish	Eleotridae	Typhleotris pauliani	CR	37.7218	51.5911	48.1775	YES	0	0	0	Unknown
59048	Amphibians	Sooglossidae	Sechellophryne pipilodryas	CR	22.5246	49.8447	46.0287	YES	0	0	0	Unknown
14663	Amphibians	Sooglossidae	Sooglossus thomasseti	CR	19.7482	48.7635	44.0434	YES	0	0	0	Unknown
13032	Amphibians	Microhylidae	Melanobatrachus indicus	EN	89.6022	89.6022	43.6812	YES	0	0	1	Decreasing
22685245	Birds	Strigopidae	Strigops habroptila	CR	43.9631	47.0809	42.9323	YES	0	0	0	Increasing
55202	Amphibians	Dendrobatidae	Minyobates steyermarki	CR	45.726	45.7449	42.246	YES	0	0	0	Decreasing
128969918	Ray-finned fish	Eleotridae	Milyeringa justitia	CR	40.5205	43.9252	41.9625	YES	0	0	0	Unknown
39386	Chondrichthyes	Sphyrnidae	Sphyrna mokarran	CR	46.0893	46.1481	41.5084	YES	0	0	0	Decreasing
4292	Chondrichthyes	Cetorhinidae	Cetorhinus maximus	EN	88.4041	88.4087	40.9331	YES	0	0	0	Decreasing
19514	Amphibians	Rhinodermatidae	Rhinoderma rufum	CR	21.9669	43.9625	40.0733	YES	0	1	0	Decreasing
57499221	Ray-finned fish	Eleotridae	Typhleotris mararybe	CR	7.44718	44.3182	39.4919	YES	0	0	0	Stable
20372	Amphibians	Leptodactylidae	Pleurodema somuncurense	CR	44.059	44.1102	38.9007	YES	0	0	0	Decreasing
6715	Amphibians	Alytidae	Latonia nigriventer	CR	41.9975	41.9975	38.6406	YES	0	0	0	Unknown
182459	Ray-finned fish	Denticipitidae	Denticeps clupeoides	VU	153.964	153.964	36.0796	YES	0	0	0	Unknown
22693049	Birds	Pedionomidae	Pedionomus torquatus	CR	39.7058	39.7059	35.952	YES	0	0	0	Decreasing
39332	Chondrichthyes	Squatinidae	Squatina squatina	CR	33.3238	38.9071	35.8417	YES	0	0	0	Decreasing
20380	Amphibians	Sooglossidae	Sechellophryne gardineri	EN	22.5246	72.8445	35.7105	YES	0	0	0	Decreasing
61417	Chondrichthyes	Squatinidae	Squatina aculeata	CR	33.1763	38.9102	35.4231	YES	0	0	0	Decreasing
20381	Amphibians	Sooglossidae	Sooglossus sechellensis	EN	19.792	73.1248	35.3072	YES	0	0	0	Decreasing
57867	Amphibians	Microhylidae	Madecassophryne truebae	EN	71.3126	71.3126	34.4355	YES	0	0	0	Decreasing
22689559	Birds	Aegothelidae	Aegotheles savesi	CR	37.7344	38.8927	34.1174	YES	0	0	0	Decreasing
17585	Testudines	Platysternidae	Platysternon megacephalum	EN	68.0344	68.0344	34.0631	YES	0	0	0	Decreasing
56492	Amphibians	Craugastoridae	Pristimantis caprifer	CR	25.881	38.8846	33.4428	YES	0	0	0	Decreasing
44617	Chondrichthyes	Ginglymostomatidae	Pseudoginglymostoma brevicaudatum	CR	19.6983	36.7525	33.2451	YES	0	0	0	Decreasing
21531	Amphibians	Myobatrachidae	Taudactylus eungellensis	CR	13.6488	35.7548	32.2219	YES	0	0	1	Decreasing
21533	Amphibians	Myobatrachidae	Taudactylus pleione	CR	13.7109	35.6106	32.0556	YES	0	0	1	Decreasing
62251	Lepidosaurs	Scincidae	Gongylomorphus bojerii	CR	29.9024	34.6001	31.3538	YES	0	0	0	Stable
22696221	Birds	Sagittariidae	Sagittarius serpentarius	EN	65.1109	65.1109	31.0902	YES	0	0	0	Decreasing
21534	Amphibians	Myobatrachidae	Taudactylus rheophilus	CR	12.903	33.6589	31.0098	YES	0	0	1	Unknown
10832	Amphibians	Rhinodermatidae	Insuetophrynus acarpicus	EN	57.7776	63.9276	30.8354	YES	0	0	0	Decreasing
21529	Amphibians	Myobatrachidae	Taudactylus acutirostris	CR	12.9742	33.7625	30.8076	YES	0	0	1	Decreasing
58010	Amphibians	Microhylidae	Anilany helenae	CR	29.3283	33.9623	30.6729	YES	0	0	0	Decreasing
175535	Amphibians	Phrynobatrachidae	Phrynobatrachus chukuchuku	CR	31.4345	33.4967	30.4715	YES	0	0	0	Decreasing
22595	Ray-finned fish	Eleotridae	Typhleotris madagascariensis	EN	19.6318	65.1553	30.4195	YES	0	0	0	Unknown
104050689	Chondrichthyes	Glaucostegidae	Glaucostegus cemiculus	CR	13.0036	32.82	30.2208	YES	0	0	0	Decreasing
135798	Amphibians	Mantellidae	Tsingymantis antitra	EN	61.1882	61.1882	29.8048	YES	0	0	0	Unknown
56326	Amphibians	Strabomantidae	Atopophrynus syntomopus	CR	31.7021	31.953	29.3873	YES	0	0	0	Decreasing
19513	Amphibians	Rhinodermatidae	Rhinoderma darwinii	EN	22.0146	61.3268	29.3022	YES	0	0	0	Decreasing
203127	Lepidosaurs	Dactyloidae	Anolis utilensis	CR	28.2496	34.346	29.2392	YES	0	0	0	Decreasing
2664	Amphibians	Hynobiidae	Afghanodon mustersi	CR	26.5172	31.4713	28.9803	YES	0	0	1	Decreasing
39385	Chondrichthyes	Sphyrnidae	Sphyrna lewini	CR	32.6267	32.7425	28.9344	YES	0	0	0	Decreasing
8966	Crocodylians	Gavialidae	Gavialis gangeticus	CR	24.7002	31.7079	28.929	YES	0	0	0	Increasing
867	Crocodylians	Alligatoridae	Alligator sinensis	CR	29.907	31.1754	28.6868	YES	0	0	0	Stable
39390	Chondrichthyes	Pristidae	Pristis clavata	EN	62.5435	66.8803	28.6372	YES	0	0	0	Decreasing
194258	Lepidosaurs	Sphaerodactylidae	Gonatodes daudini	CR	32.8817	33.1316	28.4898	YES	0	0	0	Stable
74994974	Lepidosaurs	Dactyloidae	Anolis darlingtoni	CR	30.9255	31.0296	28.1516	YES	0	0	0	Decreasing
17938	Ray-finned fish	Polyodontidae	Polyodon spathula	VU	63.1	119.12	27.8326	YES	0	0	1	Unknown
57823	Amphibians	Microhylidae	Hoplophryne uluguruensis	EN	30.0659	56.6388	27.5676	YES	0	0	0	Unknown
57822	Amphibians	Microhylidae	Hoplophryne rogersi	EN	29.9722	55.8516	27.5444	YES	0	0	0	Unknown
18377	Amphibians	Proteidae	Proteus anguinus	VU	116.279	116.279	27.2456	YES	0	0	1	Decreasing
66083295	Lepidosaurs	Sphaerodactylidae	Gonatodes infernalis	CR	29.8218	30.0334	26.8318	YES	0	0	0	Decreasing
22830	Ray-finned fish	Valenciidae	Valencia letourneuxi	CR	24.4688	28.8118	26.6094	YES	0	0	1	Decreasing
39621	Testudines	Trionychidae	Rafetus swinhoei	CR	18.8712	28.9249	26.5856	YES	0	0	0	Decreasing
22829	Ray-finned fish	Valenciidae	Valencia hispanica	CR	26.6271	28.9022	26.5709	YES	0	0	1	Decreasing
60121	Chondrichthyes	Myliobatidae	Aetomylaeus vespertilio	EN	59.7	60.9818	26.0825	YES	0	0	0	Decreasing
16801	Amphibians	Plethodontidae	Phaeognathus hubrichti	EN	53.7838	53.7838	25.8855	YES	0	0	1	Decreasing
40761	Testudines	Geoemydidae	Leucocephalon yuwonoi	CR	28.0542	28.0542	25.6521	YES	0	0	0	Decreasing
55855	Amphibians	Phyllomedusidae	Agalychnis lemur	CR	27.9497	27.9497	25.4717	YES	0	0	0	Decreasing
12774	Testudines	Testudinidae	Manouria emys	CR	21.6418	27.2822	25.4538	YES	0	0	0	Decreasing
3339	Mammals	Burramyidae	Burramys parvus	CR	27.1725	27.1726	25.1308	YES	0	0	1	Decreasing
182181	Ray-finned fish	Nothobranchiidae	Callopanchax monroviae	CR	28.6783	28.6809	25.0032	YES	0	0	0	Unknown
6004	Testudines	Trionychidae	Cyclanorbis elegans	CR	26.3186	26.9778	24.8116	YES	0	0	0	Decreasing
41810	Chondrichthyes	Sphyrnidae	Eusphyra blochii	EN	52.5194	52.5194	24.6633	YES	0	0	0	Decreasing
22691890	Birds	Columbidae	Didunculus strigirostris	CR	26.6646	26.7678	24.5475	YES	0	0	0	Decreasing
175360	Amphibians	Arthroleptidae	Arthroleptis kidogo	CR	17.6352	26.8739	24.415	YES	0	0	0	Unknown
523	Ray-finned fish	Adrianichthyidae	Adrianichthys kruyti	CR	11.7113	26.7027	24.1572	YES	0	1	0	Unknown
176174	Lepidosaurs	Diplodactylidae	Oedodera marmorata	CR	26.3872	26.3872	24.0906	YES	0	0	0	Decreasing
161077227	Ray-finned fish	Pseudomugilidae	Kiunga bleheri	CR	0.807418	26.7761	23.9972	YES	0	0	0	Decreasing
17081	Testudines	Chelidae	Mesoclemmys hogei	CR	25.8894	26.0379	23.7479	YES	0	0	0	Decreasing
58051	Amphibians	Nasikabatrachidae	Nasikabatrachus sahyadrensis	EN	12.5321	48.2703	23.338	YES	0	0	1	Decreasing
22696012	Birds	Accipitridae	Pithecophaga jefferyi	CR	25.0294	25.0294	23.1355	YES	0	0	0	Decreasing
197300	Ray-finned fish	Galaxiidae	Neochanna heleios	CR	24.2236	24.356	22.9466	YES	0	0	0	Decreasing
54615	Amphibians	Bufonidae	Nannophryne cophotis	CR	23.8215	25.0294	22.8068	YES	0	1	0	Decreasing
39599	Testudines	Geoemydidae	Siebenrockiella leytensis	CR	20.8561	25.1488	22.5963	YES	0	0	0	Decreasing
44205	Chondrichthyes	Etmopteridae	Trigonognathus kabeyai	LC	91.248	91.3034	22.3421	NO	0	0	0	Stable
58666	Amphibians	Ranidae	Glandirana minima	EN	49.9711	50.0185	22.3164	YES	0	0	0	Decreasing
59649	Amphibians	Scolecomorphidae	Crotaphatrema lamottei	CR	6.67917	24.9959	22.3107	YES	0	0	0	Decreasing
22697636	Birds	Cathartidae	Gymnogyps californianus	CR	23.6798	24.2535	22.2655	YES	0	0	0	Increasing
56874	Amphibians	Eleutherodactylidae	Eleutherodactylus poolei	CR	20.7952	24.9009	22.2332	YES	0	0	1	Unknown
58983	Amphibians	Rhacophoridae	Rhacophorus calcadensis	EN	47.2641	47.3336	22.126	YES	0	0	1	Decreasing
60225	Chondrichthyes	Lamnidae	Isurus paucus	EN	39.1713	46.0358	22.0463	YES	0	0	0	Decreasing
60170	Chondrichthyes	Glaucostegidae	Glaucostegus obtusus	CR	8.64577	24.8429	22.0304	YES	0	0	0	Decreasing
9016	Testudines	Testudinidae	Astrochelys yniphora	CR	6.35132	24.2605	21.9195	YES	0	0	1	Decreasing
59110	Amphibians	Hynobiidae	Pseudohynobius puxiongensis	CR	23.8425	23.8717	21.9153	YES	0	0	0	Decreasing
57013	Amphibians	Craugastoridae	Craugastor trachydermus	CR	14.0213	24.0285	21.9067	YES	0	1	0	Decreasing
9014	Testudines	Testudinidae	Astrochelys radiata	CR	6.35132	24.4821	21.8749	YES	0	0	1	Decreasing
161408	Chondrichthyes	Glaucostegidae	Glaucostegus halavi	CR	7.40705	25.275	21.8697	YES	0	0	0	Decreasing
16511	Testudines	Podocnemididae	Peltocephalus dumerilianus	VU	89.1083	89.1782	21.8036	YES	0	0	1	NA
39341	Chondrichthyes	Lamnidae	Isurus oxyrinchus	EN	39.1713	46.1982	21.7159	YES	0	0	0	Decreasing
21989	Ray-finned fish	Zenarchopteridae	Tondanichthys kottelati	CR	24.1785	24.1785	21.6905	YES	0	0	0	Unknown
16793075	Amphibians	Bufonidae	Nimbaphrynoides occidentalis	CR	22.4609	24.4059	21.6529	YES	0	0	0	Stable
60166	Chondrichthyes	Glaucostegidae	Glaucostegus granulatus	CR	7.52427	24.1041	21.6222	YES	0	0	0	Decreasing
58253	Amphibians	Conrauidae	Conraua derooi	CR	21.227	24.1781	21.4483	YES	0	0	0	Decreasing
161696	Chondrichthyes	Alopiidae	Alopias superciliosus	VU	97.0812	97.0812	21.4079	YES	0	0	0	Decreasing
152320185	Ray-finned fish	Osteoglossidae	Scleropages formosus	EN	47.2933	47.2936	21.2696	YES	0	0	0	Decreasing
59640	Amphibians	Rhinatrematidae	Epicrionops columbianus	EN	33.8879	44.2927	21.2567	YES	0	0	0	Unknown
54345	Amphibians	Bufonidae	Peltophryne lemur	CR	22.756	23.477	21.1541	YES	0	0	0	Decreasing
56952	Amphibians	Eleutherodactylidae	Eleutherodactylus schmidti	CR	15.5553	23.5973	21.0813	YES	0	1	1	Decreasing
55579	Amphibians	Hylidae	Megastomatohyla nubicola	CR	7.69566	23.451	21.0231	YES	1	0	0	Unknown
22692015	Birds	Otididae	Houbaropsis bengalensis	CR	14.2897	22.9659	20.9245	YES	0	0	0	Decreasing
15509	Testudines	Geoemydidae	Orlitia borneensis	CR	22.4982	22.9925	20.8834	YES	0	0	0	Decreasing
56914	Amphibians	Eleutherodactylidae	Eleutherodactylus richmondi	CR	17.3949	23.2827	20.864	YES	0	0	0	Decreasing
41874	Chondrichthyes	Hemigaleidae	Hemipristis elongata	VU	92.9268	92.9268	20.8005	YES	0	0	0	Decreasing
19036	Testudines	Testudinidae	Pyxis planicauda	CR	10.7515	22.6748	20.7155	YES	0	0	1	Decreasing
19035	Testudines	Testudinidae	Pyxis arachnoides	CR	10.7515	22.7514	20.7085	YES	0	0	1	Decreasing
181683	Ray-finned fish	Nothobranchiidae	Scriptaphyosemion schmitti	CR	17.0874	22.1226	20.6211	YES	0	0	0	Unknown
NA	Ray-finned fish	Triodontidae	Triodon macropterus	NA	80.8207	80.8207	20.4316	NO	0	0	0	NA
42712	Chondrichthyes	Carcharhinidae	Glyphis garricki	CR	15.6219	22.3271	20.4072	YES	0	0	0	Decreasing
39394	Chondrichthyes	Rhinidae	Rhynchobatus djiddensis	CR	4.58578	22.9144	20.2513	YES	0	0	0	Decreasing
61810	Amphibians	Craugastoridae	Oreobates lundbergi	EN	42.5307	42.5973	20.1964	YES	0	0	0	Unknown
6302	Mammals	Daubentoniidae	Daubentonia madagascariensis	EN	41.0943	41.0943	20.1312	YES	0	0	0	Decreasing
41853	Chondrichthyes	Rhinidae	Rhynchobatus australiae	CR	4.59073	22.5578	20.0939	YES	0	0	0	Decreasing
161582	Chondrichthyes	Dasyatidae	Megatrygon microps	DD	83.5054	83.5244	20.0579	NO	0	0	0	Unknown
9564	Mammals	Petauridae	Gymnobelideus leadbeateri	CR	21.556	21.5561	19.8501	YES	0	0	0	Decreasing
19304	Amphibians	Hynobiidae	Ranodon sibiricus	EN	36.3444	40.4505	19.7337	YES	0	0	1	Decreasing
20320	Mammals	Solenodontidae	Solenodon cubanus	EN	3.80487	40.6677	19.6839	YES	0	0	0	Decreasing
54444	Amphibians	Bombinatoridae	Barbourula kalimantanensis	EN	34.5114	41.4763	19.6642	YES	0	0	0	Decreasing
22692211	Birds	Rhynochetidae	Rhynochetos jubatus	EN	38.1689	40.4163	19.6541	YES	0	0	0	Decreasing
55141	Amphibians	Aromobatidae	Allobates ranoides	CR	15.0792	22.0093	19.5967	YES	0	1	0	Decreasing
59414	Amphibians	Plethodontidae	Thorius lunaris	CR	5.20447	21.2675	19.4167	YES	0	0	0	Decreasing
57409	Amphibians	Mantellidae	Boophis liami	CR	17.0756	21.1755	19.3618	YES	0	0	0	Decreasing
NA	Chondrichthyes	Stegostomidae	Stegostoma fasciatum	NA	19.3078	39.0785	19.3577	NO	0	0	0	NA
58916	Amphibians	Rhacophoridae	Raorchestes ponmudi	CR	20.462	21.1929	19.2901	YES	0	0	1	Decreasing
19488	Chondrichthyes	Rhincodontidae	Rhincodon typus	EN	18.4809	39.2784	19.2062	YES	0	0	0	Decreasing
54802	Amphibians	Bufonidae	Churamiti maridadi	CR	21.2362	21.2476	19.1226	YES	0	0	0	Decreasing
58076	Amphibians	Pyxicephalidae	Natalobatrachus bonebergi	EN	40.2901	40.3113	18.9931	YES	0	0	0	Decreasing
57166	Amphibians	Leptodactylidae	Leptodactylus silvanimbus	CR	18.1644	21.0095	18.8937	YES	0	0	0	Decreasing
55046	Amphibians	Dendrobatidae	Hyloxalus anthracinus	CR	12.721	20.9201	18.7222	YES	0	0	1	Decreasing
130391495	Chondrichthyes	Rhynchobatidae	Rhynchorhina mauritaniensis	CR	4.97355	20.521	18.655	YES	0	0	0	Decreasing
56577	Amphibians	Craugastoridae	Craugastor emcelae	CR	14.6208	21.0979	18.6501	YES	0	0	0	Decreasing
178592	Lepidosaurs	Dactyloidae	Anolis koopmani	CR	19.4648	20.4743	18.5302	YES	0	0	0	Decreasing
59226	Amphibians	Plethodontidae	Chiropterotriton lavae	CR	17.5811	20.4388	18.4816	YES	0	0	0	Decreasing
22693452	Birds	Scolopacidae	Calidris pygmaea	CR	20.1333	20.1333	18.4344	YES	0	0	0	Decreasing
59220	Amphibians	Plethodontidae	Bradytriton silus	EN	38.4379	38.4379	18.4321	YES	0	0	0	Decreasing
12696	Testudines	Testudinidae	Malacochersus tornieri	CR	19.8911	20.1379	18.3683	YES	0	0	0	Decreasing
58122	Amphibians	Phrynobatrachidae	Phrynobatrachus krefftii	EN	37.1769	39.7329	18.3248	YES	0	0	0	Unknown
39324	Chondrichthyes	Hexanchidae	Notorynchus cepedianus	VU	78.8894	79.1716	18.2938	YES	0	0	0	Decreasing
19070	Testudines	Trionychidae	Rafetus euphraticus	EN	18.8712	37.2936	18.1852	YES	0	0	0	Decreasing
56698	Amphibians	Eleutherodactylidae	Eleutherodactylus lamprotes	CR	8.41753	20.3704	18.1815	YES	0	0	1	Decreasing
56988	Amphibians	Eleutherodactylidae	Eleutherodactylus symingtoni	CR	9.35192	20.2484	18.1617	YES	0	0	1	Decreasing
56605	Amphibians	Eleutherodactylidae	Eleutherodactylus fowleri	CR	8.7469	20.503	18.1237	YES	0	0	1	Decreasing
59288	Amphibians	Plethodontidae	Ixalotriton parvus	CR	6.72372	19.7914	18.1045	YES	0	0	0	Decreasing
122904064	Ray-finned fish	Galaxiidae	Neochanna cleaveri	EN	37.37	37.65	18.1007	YES	0	0	0	Unknown
56618	Amphibians	Eleutherodactylidae	Eleutherodactylus glanduliferoides	CR	19.4365	19.9073	18.0517	YES	0	1	1	Decreasing
161611	Chondrichthyes	Carcharhinidae	Glyphis siamensis	CR	8.85401	20.1874	17.9831	YES	0	0	0	NA
161519	Chondrichthyes	Zanobatidae	Zanobatus schoenleinii	DD	22.4458	77.2766	17.9425	NO	0	0	0	Decreasing
60182	Chondrichthyes	Rhinidae	Rhynchobatus springeri	CR	5.6449	19.7654	17.8217	YES	0	0	0	Decreasing
60120	Chondrichthyes	Myliobatidae	Aetomylaeus maculatus	EN	38.9433	39.4528	17.6178	YES	0	0	0	Decreasing
NA	Chondrichthyes	Zanobatidae	Zanobatus maculatus	NA	22.4458	77.3367	17.6096	NO	0	0	0	NA
60180	Chondrichthyes	Rhinidae	Rhynchobatus luebberti	CR	5.17749	19.1391	17.4828	YES	0	0	0	Decreasing
60175	Chondrichthyes	Glaucostegidae	Glaucostegus thouin	CR	7.23788	18.852	17.4426	YES	0	0	0	Unknown
178423	Lepidosaurs	Scincidae	Paracontias rothschildi	CR	18.532	19.1371	17.4061	YES	0	0	0	Unknown
2645	Amphibians	Telmatobiidae	Telmatobius macrostomus	EN	12.4146	35.4694	17.3135	YES	0	0	0	Decreasing
56329	Amphibians	Telmatobiidae	Telmatobius brachydactylus	EN	12.4146	35.6847	17.2677	YES	0	0	0	Decreasing
8005	Testudines	Cheloniidae	Eretmochelys imbricata	CR	18.1251	18.9066	17.2144	YES	0	0	1	Decreasing
161597	Chondrichthyes	Alopiidae	Alopias pelagicus	EN	37.7088	38.6001	17.21	YES	0	0	0	Decreasing
55830	Amphibians	Hylidae	Phytotriades auratus	EN	37.9028	37.9028	16.8967	YES	0	0	0	Unknown
59232	Amphibians	Plethodontidae	Chiropterotriton terrestris	CR	17.8672	18.8287	16.8859	YES	0	0	0	Unknown
57975	Amphibians	Microhylidae	Rhombophryne minuta	EN	29.8632	36.4272	16.825	YES	0	0	0	Decreasing
15918	Testudines	Trionychidae	Palea steindachneri	EN	34.7163	34.7343	16.809	YES	0	0	0	Decreasing
11450	Amphibians	Leiopelmatidae	Leiopelma archeyi	CR	16.0589	18.3234	16.7395	YES	0	0	0	Stable
59497	Amphibians	Herpelidae	Boulengerula fischeri	VU	72.3158	73.2653	16.7193	YES	0	0	0	Unknown
190942	Amphibians	Microhylidae	Anodonthyla jeanbai	EN	34.9775	35.3961	16.6986	YES	0	0	0	Decreasing
59590	Amphibians	Indotyphlidae	Praslinia cooperi	EN	36.113	36.7546	16.6918	YES	0	0	0	Unknown
104061138	Chondrichthyes	Glaucostegidae	Glaucostegus typus	CR	6.77127	18.6608	16.6768	YES	0	0	0	Decreasing
175371	Amphibians	Phrynobatrachidae	Phrynobatrachus intermedius	CR	17.5281	18.4897	16.5894	YES	0	0	1	Unknown
55592	Amphibians	Hylidae	Megastomatohyla pellita	CR	7.79138	18.1788	16.5396	YES	0	0	0	Decreasing
172747	Lepidosaurs	Gekkonidae	Uroplatus malahelo	EN	27.9254	35.0875	16.5162	YES	0	0	0	Decreasing
14222	Mammals	Myrmecobiidae	Myrmecobius fasciatus	EN	33.7307	33.7307	16.4663	YES	0	0	0	Decreasing
NA	Amphibians	Nasikabatrachidae	Nasikabatrachus bhupathi	NA	12.545	69.8673	16.4458	NO	0	0	0	NA
56836	Amphibians	Eleutherodactylidae	Eleutherodactylus paulsoni	CR	14.5364	18.9927	16.4179	YES	0	0	1	Decreasing
172927	Lepidosaurs	Gekkonidae	Uroplatus guentheri	EN	27.7822	35.0043	16.4145	YES	0	0	0	Decreasing
175363	Amphibians	Brevicipitidae	Callulina dawida	CR	14.5131	17.9525	16.3788	YES	0	0	0	Decreasing
190944	Amphibians	Microhylidae	Anodonthyla vallani	CR	16.6333	17.9659	16.2525	YES	0	0	0	Decreasing
166868	Ray-finned fish	Megalopidae	Megalops cyprinoides	NA	42.9106	63.7406	16.1969	NO	0	0	0	Unknown
190941	Amphibians	Microhylidae	Anodonthyla emilei	EN	34.0397	35.0536	16.183	YES	0	0	0	Decreasing
104019954	Chondrichthyes	Rhinidae	Rhynchobatus immaculatus	CR	4.01663	17.8901	16.1738	YES	0	0	0	Decreasing
8814	Ray-finned fish	Galaxiidae	Galaxias rostratus	CR	16.4232	16.8804	16.1554	YES	0	0	0	Decreasing
61425	Lepidosaurs	Chamaeleonidae	Archaius tigris	EN	32.3579	32.3623	16.1552	YES	0	0	0	Unknown
61408	Chondrichthyes	Rajidae	Rostroraja alba	EN	34.8476	35.2469	16.1415	YES	0	0	1	Decreasing
191823	Ray-finned fish	Megalopidae	Megalops atlanticus	VU	42.9106	65.3734	16.1026	YES	0	0	0	Decreasing
59648	Amphibians	Scolecomorphidae	Crotaphatrema bornmuelleri	DD	46.9521	82.0432	16.0577	NO	1	0	0	Unknown
172934	Lepidosaurs	Chamaeleonidae	Furcifer balteatus	EN	33.5733	33.714	16.0555	YES	0	0	0	Decreasing
10953	Testudines	Geoemydidae	Batagur dhongoka	CR	10.907	17.7598	16.0494	YES	0	0	0	Decreasing
17823	Testudines	Podocnemididae	Podocnemis lewyana	CR	16.1051	17.2605	16.0492	YES	0	0	0	Decreasing
186165	Amphibians	Rhacophoridae	Raorchestes marki	CR	17.1758	17.8065	16.0423	YES	0	0	0	Decreasing
60181	Chondrichthyes	Rhinidae	Rhynchobatus cooki	CR	4.33685	17.6855	15.9836	YES	0	0	0	Decreasing
99943296	Lepidosaurs	Gekkonidae	Cnemaspis paripari	CR	17.6526	18.0644	15.9817	YES	0	0	0	Unknown
56511	Amphibians	Eleutherodactylidae	Eleutherodactylus chlorophenax	CR	0.5622	17.8499	15.9282	YES	0	0	1	Decreasing
2780	Ray-finned fish	Osphronemidae	Betta miniopinna	CR	11.5375	17.2048	15.9117	YES	0	0	0	Unknown
NA	Ray-finned fish	Citharidae	Lepidoblepharon ophthalmolepis	NA	60.8481	60.8539	15.9009	NO	0	0	0	NA
56796	Amphibians	Eleutherodactylidae	Eleutherodactylus nortoni	CR	0.563865	17.8354	15.8757	YES	0	0	1	Decreasing
89824307	Ray-finned fish	Osphronemidae	Parosphromenus alfredi	CR	9.88493	17.1491	15.8648	YES	0	0	0	Decreasing
3989	Lepidosaurs	Bolyeriidae	Casarea dussumieri	VU	64.7991	67.6008	15.843	YES	0	0	0	Increasing
193426	Amphibians	Brevicipitidae	Callulina kanga	CR	12.1644	17.3593	15.8389	YES	0	0	0	Unknown
NA	Lepidosaurs	Lanthanotidae	Lanthanotus borneensis	NA	66.5282	66.5282	15.8345	NO	0	0	0	NA
175359	Amphibians	Arthroleptidae	Arthroleptis fichika	EN	18.6434	32.4928	15.8207	YES	0	0	1	Unknown
7807	Ray-finned fish	Cyprinidae	Epalzeorhynchos bicolor	CR	18.0753	18.1324	15.7792	YES	0	0	0	Unknown
10949	Testudines	Geoemydidae	Batagur kachuga	CR	7.92439	17.178	15.7732	YES	0	0	0	Decreasing
10952	Testudines	Geoemydidae	Batagur trivittata	CR	6.68653	17.2432	15.7373	YES	0	0	0	Decreasing
230	Ray-finned fish	Acipenseridae	Acipenser sturio	CR	15.9413	15.9414	15.7291	YES	0	0	1	Decreasing
163458	Testudines	Geoemydidae	Batagur borneoensis	CR	6.68653	17.3091	15.7036	YES	0	0	0	Decreasing
NA	Lepidosaurs	Gerrhopilidae	Cathetorhinus melanocephalus	NA	67.2021	67.2021	15.6835	NO	0	0	0	NA
22695336	Birds	Accipitridae	Eutriorchis astur	EN	32.2955	32.2984	15.6792	YES	0	0	0	Decreasing
56931	Amphibians	Eleutherodactylidae	Eleutherodactylus rufifemoralis	CR	8.75466	17.3528	15.6332	YES	0	0	1	Unknown
56608	Amphibians	Eleutherodactylidae	Eleutherodactylus furcyensis	CR	8.78162	17.2893	15.6136	YES	0	0	1	Unknown
55567	Amphibians	Hylidae	Megastomatohyla mixe	CR	6.01788	17.0793	15.5088	YES	0	0	0	Unknown
41064	Chondrichthyes	Rhinobatidae	Pseudobatos horkelii	CR	11.6	17.4628	15.4958	YES	0	0	0	Decreasing
3461	Ray-finned fish	Melanotaeniidae	Cairnsichthys rhombosomoides	EN	18.2585	38.038	15.4888	YES	0	0	0	Decreasing
13318	Amphibians	Pyxicephalidae	Microbatrachella capensis	CR	13.7952	16.9943	15.4597	YES	0	0	0	Decreasing
170501	Testudines	Geoemydidae	Batagur affinis	CR	4.70675	16.93	15.4187	YES	0	0	0	Decreasing
97358453	Testudines	Geoemydidae	Batagur baska	CR	4.70675	16.9218	15.3943	YES	0	0	0	Decreasing
56527	Amphibians	Eleutherodactylidae	Eleutherodactylus counouspeus	EN	9.58142	32.3015	15.3392	YES	0	0	1	Decreasing
193427	Amphibians	Brevicipitidae	Callulina laphami	CR	5.59116	16.6706	15.3256	YES	0	0	0	Unknown
54440	Amphibians	Arthroleptidae	Leptodactylodon wildi	CR	10.388	17.0712	15.3101	YES	0	0	0	Decreasing
193428	Amphibians	Brevicipitidae	Callulina shengena	CR	5.6756	16.6676	15.2682	YES	0	0	0	Unknown
99942532	Lepidosaurs	Dibamidae	Dibamus tiomanensis	EN	28.3777	33.2099	15.2634	YES	0	0	0	Stable
172883	Lepidosaurs	Gekkonidae	Paroedura masobe	EN	33.6751	34.1328	15.2376	YES	0	0	0	Decreasing
73343869	Amphibians	Arthroleptidae	Arthroleptis xenodactylus	EN	29.7787	32.6774	15.2368	YES	0	0	0	Decreasing
54432	Amphibians	Arthroleptidae	Leptodactylodon erythrogaster	CR	10.624	17.0694	15.1857	YES	0	0	0	Decreasing
54897	Amphibians	Bufonidae	Wolterstorffina chirioi	CR	7.96528	16.7189	15.1817	YES	0	0	0	Decreasing
136497	Mammals	Manidae	Manis culionensis	CR	4.97292	16.676	15.1416	YES	0	0	0	Decreasing
54308994	Amphibians	Ranidae	Odorrana ishikawae	EN	33.5407	34.022	15.137	YES	0	0	0	Stable
61568	Lepidosaurs	Sphaerodactylidae	Saurodactylus fasciatus	VU	64.5747	65.4117	15.1198	YES	0	0	1	Decreasing
54388	Amphibians	Arthroleptidae	Arthroleptis tanneri	EN	29.1732	33.5804	15.1023	YES	0	0	0	Decreasing
136010	Amphibians	Plethodontidae	Oedipina tomasi	CR	9.78905	16.5901	15.0882	YES	0	0	0	Decreasing
59652	Amphibians	Scolecomorphidae	Scolecomorphus uluguruensis	EN	29.2202	30.9271	15.0669	YES	0	0	0	Unknown
59287	Amphibians	Plethodontidae	Ixalotriton niger	EN	6.72372	31.3158	15.0294	YES	0	0	0	Decreasing
193262	Lepidosaurs	Gekkonidae	Lygodactylus roavolana	EN	33.1697	34.7143	15.0293	YES	0	0	0	Decreasing
149335691	Amphibians	Plethodontidae	Oedipina gephyra	CR	9.86484	16.6493	15.0228	YES	0	0	0	Decreasing
78516909	Amphibians	Salamandridae	Cynops glaucus	CR	16.3635	16.6743	15.0097	YES	0	0	0	Decreasing
79789021	Amphibians	Microhylidae	Cophyla puellarum	CR	12.5468	16.8173	15.0016	NO	0	0	0	Decreasing
56403	Amphibians	Eleutherodactylidae	Eleutherodactylus albipes	CR	15.8325	16.8091	14.979	YES	0	0	1	Decreasing
9038	Testudines	Geoemydidae	Vijayachelys silvatica	EN	30.1175	30.3252	14.9681	YES	0	0	0	Decreasing
74995297	Lepidosaurs	Dactyloidae	Anolis eugenegrahami	CR	15.4483	16.5306	14.9612	YES	0	0	0	Decreasing
22678576	Birds	Megapodiidae	Macrocephalon maleo	EN	30.4348	30.4348	14.9521	YES	0	0	0	Decreasing
59650	Amphibians	Scolecomorphidae	Crotaphatrema tchabalmbaboensis	DD	6.44725	74.0873	14.9232	NO	0	0	0	Unknown
54899	Amphibians	Bufonidae	Wolterstorffina parvipalmata	CR	7.7002	16.6358	14.9191	YES	0	0	0	Decreasing
60119	Chondrichthyes	Aetobatidae	Aetobatus flagellum	EN	24.6346	32.4783	14.9065	YES	0	0	0	Decreasing
48100463	Amphibians	Rhacophoridae	Theloderma palliatum	EN	30.7651	31.2446	14.8572	YES	0	0	0	Decreasing
79788927	Amphibians	Microhylidae	Cophyla maharipeo	CR	11.7777	16.278	14.8363	NO	0	0	0	Decreasing
16997	Amphibians	Limnodynastidae	Philoria frosti	CR	8.99307	15.9283	14.7038	YES	0	0	1	Decreasing
61804	Amphibians	Craugastoridae	Craugastor tabasarae	CR	13.3676	16.4737	14.7007	YES	0	0	0	Decreasing
NA	Lepidosaurs	Gekkonidae	Rhoptropella ocellata	NA	61.7315	61.7491	14.6709	NO	0	0	0	NA
58310	Amphibians	Ranixalidae	Indirana gundia	CR	10.284	16.2451	14.6526	NO	0	0	1	Decreasing
91315657	Ray-finned fish	Osphronemidae	Parosphromenus ornaticauda	CR	12.3055	16.3918	14.6205	YES	0	0	0	Decreasing
56955	Amphibians	Eleutherodactylidae	Eleutherodactylus sciagraphus	CR	1.56763	16.077	14.6139	YES	0	0	1	Unknown
22682464	Birds	Bucerotidae	Rhinoplax vigil	CR	15.8382	16.0804	14.5917	YES	0	0	0	Decreasing
8820	Ray-finned fish	Galaxiidae	Galaxiella pusilla	EN	30.089	31.695	14.585	YES	0	0	0	Decreasing
56617	Amphibians	Eleutherodactylidae	Eleutherodactylus glandulifer	CR	1.55555	16.338	14.5722	YES	0	0	1	Unknown
9029	Testudines	Geoemydidae	Geoclemys hamiltonii	EN	30.3298	30.3298	14.5649	YES	0	0	0	Decreasing
57034	Amphibians	Eleutherodactylidae	Eleutherodactylus ventrilineatus	CR	9.08926	16.4055	14.5425	YES	0	0	1	Unknown
56475	Amphibians	Eleutherodactylidae	Eleutherodactylus brevirostris	CR	8.93838	15.9347	14.499	YES	0	0	1	Decreasing
58571	Amphibians	Dicroglossidae	Ingerana charlesdarwini	CR	11.7225	15.6597	14.4952	YES	0	0	1	Decreasing
22692024	Birds	Otididae	Sypheotides indicus	EN	14.309	30.4147	14.4865	YES	0	0	0	Decreasing
57081	Amphibians	Strabomantidae	Geobatrachus walkeri	EN	28.9432	30.0581	14.4294	YES	0	0	0	Stable
55113	Amphibians	Aromobatidae	Allobates mcdiarmidi	CR	9.49756	16.2492	14.3904	YES	0	1	0	Decreasing
39374	Chondrichthyes	Carcharhinidae	Carcharhinus longimanus	CR	15.7402	16.1968	14.3792	YES	0	0	0	Decreasing
NA	Lepidosaurs	Lacertidae	Poromera fordii	NA	59.1978	59.1978	14.3336	NO	0	0	0	NA
2759	Ray-finned fish	Osphronemidae	Belontia signata	VU	59.0133	59.483	14.3279	YES	0	0	0	Decreasing
104695227	Lepidosaurs	Gekkonidae	Cyrtodactylus nigriocularis	CR	11.4743	15.8124	14.3082	YES	0	0	0	Unknown
125851287	Ray-finned fish	Adrianichthyidae	Oryzias asinua	EN	24.3048	30.91	14.3065	YES	0	0	0	Stable
55165	Amphibians	Dendrobatidae	Hyloxalus vertebralis	CR	10.6909	16.4642	14.305	YES	0	0	1	Decreasing
12764	Mammals	Manidae	Manis pentadactyla	CR	0.759301	15.6415	14.2692	YES	0	0	0	Decreasing
12726	Ray-finned fish	Osphronemidae	Malpulutta kretseri	EN	31.9269	32.0785	14.2395	YES	0	0	0	Decreasing
12763	Mammals	Manidae	Manis javanica	CR	0.757052	15.8474	14.2319	YES	0	0	0	Decreasing
10613	Amphibians	Hynobiidae	Hynobius abei	CR	15.4224	15.5459	14.2302	YES	0	0	0	Decreasing
75600764	Lepidosaurs	Leptotyphlopidae	Mitophis asbolepis	CR	8.12204	15.5433	14.2196	YES	0	0	0	Unknown
74724619	Amphibians	Phrynobatrachidae	Phrynobatrachus steindachneri	CR	14.1964	15.6633	14.1889	YES	0	0	0	Decreasing
172898	Lepidosaurs	Gekkonidae	Paroedura lohatsara	CR	15.1475	15.678	14.1454	YES	0	0	0	Decreasing
54377	Amphibians	Arthroleptidae	Arthroleptis nikeae	CR	14.1399	15.4851	14.1425	YES	0	0	0	Unknown
21567318	Amphibians	Rhinatrematidae	Rhinatrema shiv	EN	25.9907	29.5515	14.1363	YES	0	0	0	Decreasing
22684840	Birds	Strigopidae	Nestor meridionalis	EN	3.5756	28.8782	14.097	YES	0	0	0	Decreasing
NA	Ray-finned fish	Menidae	Mene maculata	NA	68.4955	68.4955	14.0885	NO	0	0	0	NA
193425	Amphibians	Brevicipitidae	Callulina hanseni	CR	6.07267	15.6412	14.0881	YES	0	0	0	Unknown
22684831	Birds	Strigopidae	Nestor notabilis	EN	3.5756	28.7739	14.0833	YES	0	0	0	Decreasing
56632	Amphibians	Eleutherodactylidae	Eleutherodactylus greyi	EN	29.664	30.2235	14.0156	YES	0	0	1	Decreasing
57677	Amphibians	Microhylidae	Anodonthyla rouxae	EN	27.7739	29.5675	14.0122	YES	0	0	0	Unknown
9042	Testudines	Geoemydidae	Geoemyda japonica	EN	17.9361	28.3219	13.9795	YES	0	0	1	NA
54389	Amphibians	Arthroleptidae	Arthroleptis troglodytes	CR	10.3504	15.4149	13.9618	YES	0	1	0	Unknown
202410	Amphibians	Brevicipitidae	Callulina meteora	CR	6.85516	15.7923	13.9566	YES	0	0	0	Unknown
46981005	Amphibians	Microhylidae	Kalophrynus yongi	CR	12.61	15.5128	13.9179	YES	0	0	0	Unknown
41052	Amphibians	Myobatrachidae	Spicospina flammocaerulea	VU	58.4513	58.4513	13.9166	YES	0	0	1	Stable
9773	Amphibians	Heleophrynidae	Heleophryne rosei	CR	12.8285	15.4569	13.846	YES	0	0	0	Decreasing
56785	Amphibians	Craugastoridae	Strabomantis necerus	CR	9.95615	14.8946	13.8392	YES	0	1	0	Decreasing
18917785	Lepidosaurs	Eublepharidae	Goniurosaurus yamashinae	CR	9.48795	15.2397	13.8082	YES	0	0	0	Decreasing
57065	Amphibians	Eleutherodactylidae	Eleutherodactylus zeus	EN	9.70233	30.7002	13.8017	YES	0	0	1	Decreasing
44661	Ray-finned fish	Clupeidae	Sauvagella robusta	EN	27.181	28.1034	13.7972	YES	0	0	0	Unknown
79130281	Amphibians	Microhylidae	Rhombophryne serratopalpebrosa	EN	28.0791	29.3893	13.7968	YES	0	0	0	Decreasing
78535878	Amphibians	Microhylidae	Cophyla karenae	CR	10.3784	15.1197	13.7904	YES	0	0	0	Decreasing
59642	Amphibians	Rhinatrematidae	Epicrionops marmoratus	DD	47.0177	60.6122	13.7768	NO	0	0	0	Unknown
201942	Ray-finned fish	Amiidae	Amia calva	LC	251.2	251.2	13.7572	NO	0	0	0	Stable
42686901	Lepidosaurs	Chamaeleonidae	Brookesia desperata	CR	11.2012	14.9839	13.7193	YES	0	0	0	Decreasing
75601065	Lepidosaurs	Leptotyphlopidae	Mitophis calypso	CR	4.70866	15.0651	13.7083	YES	0	0	0	Unknown
194311	Amphibians	Plethodontidae	Dendrotriton kekchiorum	CR	2.04351	15.2526	13.6924	YES	0	0	0	Decreasing
47102682	Lepidosaurs	Scincidae	Capitellum metallicum	CR	3.99931	15.0345	13.6784	YES	1	1	0	Unknown
161495	Chondrichthyes	Dasyatidae	Fontitrygon margarita	EN	16.5711	26.6806	13.6684	YES	0	0	0	Decreasing
57963	Amphibians	Microhylidae	Cophyla tsaratananaensis	EN	25.3392	28.7927	13.6636	YES	0	0	0	Decreasing
47102699	Lepidosaurs	Scincidae	Capitellum parvicruzae	CR	3.89661	15.0363	13.6597	YES	1	1	0	Decreasing
163971035	Amphibians	Nyctibatrachidae	Lankanectes pera	CR	12.2198	14.9684	13.6574	YES	0	0	0	Decreasing
58065	Amphibians	Petropedetidae	Arthroleptides yakusini	EN	1.06517	28.6754	13.6525	YES	0	0	0	Unknown
NA	Chondrichthyes	Dasyatidae	Fluvitrygon oxyrhynchus	NA	24.6999	28.7968	13.639	NO	0	0	0	NA
58064	Amphibians	Petropedetidae	Arthroleptides martiensseni	EN	1.06223	28.1489	13.6335	YES	0	0	0	Unknown
59241	Amphibians	Plethodontidae	Dendrotriton sanctibarbarus	CR	14.2149	14.9782	13.6254	YES	0	0	0	Decreasing
39552	Testudines	Geoemydidae	Geoemyda spengleri	EN	17.9361	28.6836	13.59	YES	0	0	0	Decreasing
62222	Ray-finned fish	Plecoglossidae	Plecoglossus altivelis	NA	56.83	56.83	13.5895	NO	0	0	1	Decreasing
47102670	Lepidosaurs	Scincidae	Capitellum mariagalantae	CR	3.58756	15.1559	13.5801	YES	1	1	0	Unknown
44575	Chondrichthyes	Arhynchobatidae	Atlantoraja castelnaui	CR	26.8445	27.4113	13.5478	YES	0	0	0	Decreasing
4657	Amphibians	Salamandridae	Chioglossa lusitanica	VU	53.7172	56.9405	13.5461	YES	0	0	1	Decreasing
18917797	Lepidosaurs	Eublepharidae	Goniurosaurus yingdeensis	CR	6.20409	15.094	13.532	YES	0	0	0	Decreasing
10616	Amphibians	Hynobiidae	Hynobius okiensis	CR	14.8598	15.0165	13.4843	YES	0	0	0	Decreasing
176178	Lepidosaurs	Diplodactylidae	Dierogekko poumensis	CR	14.7446	14.8436	13.4441	YES	0	0	0	Decreasing
189700	Amphibians	Bufonidae	Xanthophryne tigerina	CR	7.37696	14.7126	13.4417	YES	0	0	0	Decreasing
150088930	Amphibians	Plethodontidae	Chiropterotriton aureus	CR	8.10255	14.8488	13.3975	YES	0	0	0	Unknown
39411	Chondrichthyes	Dasyatidae	Fluvitrygon signifer	EN	24.8052	29.0375	13.3973	YES	0	0	0	Decreasing
158635	Amphibians	Phrynobatrachidae	Phrynobatrachus pintoi	EN	27.2121	28.1141	13.3913	YES	0	0	0	Unknown
NA	Lepidosaurs	Gymnophthalmidae	Rhachisaurus brachylepis	NA	57.9974	58.0176	13.3836	NO	0	0	0	NA
NA	Ray-finned fish	Leptobramidae	Leptobrama muelleri	NA	72.7792	72.7792	13.3684	NO	0	0	0	NA
131735762	Lepidosaurs	Sphenodontidae	Sphenodon punctatus	LC	243.038	243.038	13.3554	NO	0	0	0	Unknown
61419	Chondrichthyes	Trygonorrhinidae	Zapteryx brevirostris	EN	39.8328	58.1353	13.3494	YES	0	0	0	Decreasing
13198	Amphibians	Salamandridae	Mertensiella caucasica	VU	53.7172	56.9328	13.3481	YES	0	0	1	Decreasing
57352	Amphibians	Telmatobiidae	Telmatobius niger	CR	7.66399	14.7565	13.3461	YES	0	1	1	Decreasing
49581455	Amphibians	Microhylidae	Rhombophryne matavy	CR	9.9372	14.6576	13.3295	YES	0	0	0	Decreasing
136191	Amphibians	Hynobiidae	Pseudohynobius shuichengensis	CR	13.8376	14.4476	13.311	YES	0	0	0	Decreasing
14665363	Lepidosaurs	Gekkonidae	Lygodactylus williamsi	CR	15.0949	15.1897	13.2899	YES	0	0	0	Decreasing
57366	Amphibians	Telmatobiidae	Telmatobius vellardi	CR	7.68968	14.6098	13.239	YES	0	1	1	Decreasing
150088962	Amphibians	Plethodontidae	Chiropterotriton nubilus	CR	7.79429	14.6779	13.221	YES	0	0	0	Unknown
39379	Chondrichthyes	Carcharhinidae	Glyphis glyphis	EN	15.8456	27.5572	13.2181	YES	0	0	0	Decreasing
55100	Amphibians	Aromobatidae	Allobates kingsburyi	EN	21.5324	27.8401	13.2089	YES	0	0	1	Decreasing
18917702	Lepidosaurs	Eublepharidae	Goniurosaurus huuliensis	CR	8.17185	14.7522	13.165	YES	0	0	0	Unknown
22703608	Birds	Atrichornithidae	Atrichornis rufescens	EN	17.1482	28.4069	13.1389	YES	0	0	0	Decreasing
76317553	Amphibians	Phrynobatrachidae	Phrynobatrachus njiomock	CR	10.4456	14.1276	13.1219	YES	0	1	0	Decreasing
NA	Ray-finned fish	Lactariidae	Lactarius lactarius	NA	67.9035	67.9035	13.1216	NO	0	0	0	NA
178313	Lepidosaurs	Dactyloidae	Anolis strahmi	EN	26.9519	27.0759	13.1093	YES	0	0	0	Decreasing
56827	Amphibians	Eleutherodactylidae	Eleutherodactylus parapelates	CR	11.3783	14.5336	13.0601	YES	0	0	1	Unknown
168627110	Ray-finned fish	Poeciliidae	Poeciliopsis paucimaculata	EN	28.4983	28.5803	13.0586	YES	0	0	0	Unknown
56767	Amphibians	Eleutherodactylidae	Eleutherodactylus minutus	EN	23.8469	27.8061	13.0395	YES	0	0	1	Decreasing
22678286	Birds	Tinamidae	Taoniscus nanus	EN	27.1927	27.2236	13.0319	YES	0	0	0	Decreasing
8218	Lepidosaurs	Scincidae	Plestiodon longirostris	CR	14.0575	14.1378	13.0193	YES	0	0	0	Decreasing
67009871	Lepidosaurs	Chamaeleonidae	Brookesia minima	EN	27.2584	27.4678	13.0187	YES	0	0	0	Decreasing
22003	Ray-finned fish	Sciaenidae	Totoaba macdonaldi	CR	12.3716	15.1855	13.0156	YES	0	0	0	Decreasing
172777	Lepidosaurs	Chamaeleonidae	Brookesia ramanantsoai	EN	25.1664	26.2627	13.0081	YES	0	0	0	Decreasing
169714	Lepidosaurs	Liolaemidae	Ctenoblepharys adspersa	VU	54.8928	54.8928	13.0044	YES	0	0	0	Unknown
90980527	Ray-finned fish	Adrianichthyidae	Adrianichthys roseni	CR	4.46804	14.552	12.9831	YES	0	1	0	Unknown
56549	Amphibians	Eleutherodactylidae	Eleutherodactylus darlingtoni	CR	2.98478	14.3881	12.9573	YES	0	0	1	Unknown
14507	Ray-finned fish	Galaxiidae	Neochanna apoda	EN	26.9583	27.1182	12.9504	YES	0	0	0	Decreasing
22703612	Birds	Atrichornithidae	Atrichornis clamosus	EN	17.1482	28.4106	12.9458	YES	0	0	0	Decreasing
54886	Amphibians	Bufonidae	Altiphrynoides osgoodi	CR	5.8827	14.1156	12.9375	YES	0	1	0	Unknown
57994	Amphibians	Microhylidae	Rhombophryne testudo	EN	25.5044	26.8364	12.9352	YES	0	0	0	Decreasing
56712	Amphibians	Eleutherodactylidae	Eleutherodactylus leoncei	CR	2.98863	14.3889	12.898	YES	0	0	1	Unknown
58396	Amphibians	Nyctibatrachidae	Nyctibatrachus beddomii	EN	24.5543	27.2535	12.8915	YES	0	0	1	Decreasing
59221	Amphibians	Plethodontidae	Chiropterotriton arboreus	CR	12.2279	14.1031	12.8868	YES	0	0	0	Decreasing
57954	Amphibians	Microhylidae	Cophyla alticola	EN	26.3377	28.1771	12.8705	YES	0	0	0	Decreasing
56428	Amphibians	Eleutherodactylidae	Eleutherodactylus apostates	CR	8.72582	14.2464	12.864	YES	0	0	1	Unknown
56825	Amphibians	Eleutherodactylidae	Eleutherodactylus parabates	CR	12.8472	14.1693	12.8438	YES	0	0	1	Unknown
56819	Amphibians	Eleutherodactylidae	Eleutherodactylus oxyrhyncus	CR	8.67469	14.2663	12.8234	YES	0	0	1	Unknown
57504	Amphibians	Mantellidae	Spinomantis microtis	EN	25.6119	26.5321	12.8057	YES	0	0	0	Decreasing
55040	Amphibians	Aromobatidae	Aromobates nocturnus	CR	9.64396	14.1645	12.7945	YES	0	1	0	Decreasing
41854	Chondrichthyes	Rhinidae	Rhynchobatus laevis	CR	6.93277	14.1166	12.7781	YES	0	0	0	Decreasing
54893	Amphibians	Bufonidae	Werneria bambutensis	CR	7.61896	13.8022	12.7585	YES	0	0	0	Decreasing
56550	Amphibians	Craugastoridae	Craugastor daryi	EN	16.459	26.039	12.7523	YES	0	0	0	Decreasing
5660	Crocodylians	Crocodylidae	Mecistops cataphractus	CR	9.07772	13.9613	12.7405	YES	0	0	0	Decreasing
56688	Amphibians	Eleutherodactylidae	Eleutherodactylus jugans	CR	13.6978	13.9815	12.7347	YES	0	0	1	Decreasing
41802	Chondrichthyes	Echinorhinidae	Echinorhinus cookei	DD	26.003	45.2496	12.7247	NO	0	0	0	Unknown
16470	Amphibians	Bufonidae	Pedostibes tuberculosus	EN	26.8019	26.8132	12.7151	YES	0	0	1	Decreasing
16770720	Amphibians	Arthroleptidae	Arthroleptis kutogundua	CR	10.2484	13.9938	12.7135	YES	1	1	0	Unknown
55524	Amphibians	Hylidae	Nesorohyla kanaima	EN	12.0843	26.6468	12.6996	YES	0	0	0	Decreasing
149687139	Amphibians	Phrynobatrachidae	Phrynobatrachus afiabirago	CR	11.1605	13.7223	12.6881	NO	0	0	0	Decreasing
49182559	Ray-finned fish	Sciaenidae	Larimichthys crocea	CR	16.6202	16.6523	12.6856	YES	0	0	0	Decreasing
164889	Amphibians	Mantellidae	Boophis baetkei	CR	11.552	13.9425	12.6452	YES	0	0	0	Decreasing
4967	Testudines	Emydidae	Glyptemys muhlenbergii	CR	8.58128	13.9473	12.6354	YES	0	0	1	Unknown
104686673	Lepidosaurs	Gekkonidae	Cyrtodactylus chanhomeae	CR	13.0651	13.9777	12.6316	YES	0	0	0	Decreasing
14260	Mammals	Mystacinidae	Mystacina robusta	CR	3.44862	14.0768	12.6233	YES	1	1	0	Unknown
75601408	Lepidosaurs	Leptotyphlopidae	Mitophis leptepileptus	CR	4.92661	13.8763	12.6208	YES	0	1	0	Decreasing
NA	Lepidosaurs	Boidae	Calabaria reinhardtii	NA	50.3374	50.3374	12.5972	NO	0	0	0	NA
57532	Amphibians	Mantellidae	Gephyromantis webbi	EN	25.5365	25.9145	12.5843	YES	0	0	0	Decreasing
57492	Amphibians	Mantellidae	Gephyromantis klemmeri	EN	26.3222	26.5248	12.5828	YES	0	0	0	Decreasing
39350	Chondrichthyes	Leptochariidae	Leptocharias smithii	NT	98.9275	98.9275	12.5788	NO	0	0	0	Decreasing
56452	Amphibians	Eleutherodactylidae	Eleutherodactylus bartonsmithi	CR	13.6647	13.8437	12.5738	YES	0	0	1	Decreasing
59419	Amphibians	Plethodontidae	Thorius munificus	CR	5.34136	13.9523	12.5438	YES	0	0	0	Decreasing
NA	Amphibians	Myobatrachidae	Crinia fimbriata	NA	45.6988	45.6988	12.5427	NO	0	0	0	NA
191775	Ray-finned fish	Poeciliidae	Xiphophorus andersi	EN	28.4556	28.4556	12.5409	YES	0	0	0	Decreasing
22695180	Birds	Accipitridae	Neophron percnopterus	EN	25.3484	26.2644	12.5386	YES	0	0	0	Decreasing
56920	Amphibians	Eleutherodactylidae	Eleutherodactylus rivularis	CR	13.1512	13.8885	12.4681	YES	0	0	1	Decreasing
136095	Amphibians	Cycloramphidae	Cycloramphus faustoi	CR	10.1774	13.8379	12.4634	YES	0	0	1	Unknown
59089	Amphibians	Hynobiidae	Hynobius amjiensis	CR	13.5958	13.8242	12.4575	YES	0	0	0	Decreasing
62213	Ray-finned fish	Goodeidae	Empetrichthys latos	CR	11.308	12.8142	12.3558	YES	0	0	0	Unknown
3855	Chondrichthyes	Lamnidae	Carcharodon carcharias	VU	51.6999	53.5871	12.3498	YES	0	0	0	Decreasing
39335	Chondrichthyes	Brachaeluridae	Brachaelurus colcloughi	VU	51.8155	55.6915	12.3337	YES	0	0	0	Decreasing
112949827	Chondrichthyes	Rajidae	Orbiraja jensenae	NT	57.7428	57.8657	12.3313	NO	0	0	0	Decreasing
12876	Testudines	Geoemydidae	Mauremys annamensis	CR	10.039	13.3413	12.319	YES	0	0	0	Decreasing
14499	Ray-finned fish	Nematogenyidae	Nematogenys inermis	NA	97.4331	97.4331	12.2921	NO	0	0	1	NA
22695254	Birds	Accipitridae	Sarcogyps calvus	CR	13.3304	13.4629	12.2715	YES	0	0	0	Decreasing
6553	Mammals	Rhinocerotidae	Dicerorhinus sumatrensis	CR	12.5484	13.2468	12.2705	YES	0	0	0	Decreasing
172795	Lepidosaurs	Chamaeleonidae	Brookesia peyrierasi	EN	22.5487	25.3548	12.2697	YES	0	0	0	Decreasing
56513	Amphibians	Craugastoridae	Craugastor chrysozetetes	CR	7.35226	13.5505	12.2589	YES	0	1	0	Decreasing
NA	Chondrichthyes	Pristidae	Pristis perotteti	NA	27.2659	59.5071	12.2528	NO	0	0	0	NA
22698585	Birds	Acanthisittidae	Xenicus gilviventris	EN	22.5405	24.9663	12.2457	YES	0	0	0	Decreasing
176295	Lepidosaurs	Chamaeleonidae	Brookesia exarmata	EN	22.7389	25.1099	12.2397	YES	0	0	0	Decreasing
56323	Amphibians	Batrachylidae	Atelognathus patagonicus	CR	9.25857	13.3446	12.2376	YES	0	0	0	Increasing
172808	Lepidosaurs	Chamaeleonidae	Brookesia dentata	EN	22.6247	25.0053	12.2254	YES	0	0	0	Decreasing
58881	Amphibians	Rhacophoridae	Pseudophilautus ocularis	CR	10.7262	13.7255	12.2201	YES	0	0	0	Decreasing
172748	Lepidosaurs	Chamaeleonidae	Brookesia karchei	EN	22.4009	25.4148	12.2191	YES	0	0	0	Decreasing
20332	Mammals	Soricidae	Solisorex pearsoni	EN	26.468	26.468	12.219	YES	0	0	1	Decreasing
21981	Crocodylians	Crocodylidae	Tomistoma schlegelii	VU	24.7002	51.2599	12.2104	YES	0	0	0	Decreasing
20467	Ray-finned fish	Amblyopsidae	Speoplatyrhinus poulsoni	CR	12.8757	13.0591	12.2102	YES	0	0	0	Stable
43340051	Amphibians	Dicroglossidae	Occidozyga tompotika	CR	13.0492	14.0028	12.1982	YES	0	0	0	Decreasing
78494566	Amphibians	Salamandridae	Echinotriton maxiquadratus	CR	4.82121	13.4918	12.1476	YES	0	0	0	Decreasing
172524	Lepidosaurs	Chamaeleonidae	Rhampholeon acuminatus	CR	12.5048	13.4017	12.1445	YES	0	0	0	Unknown
41801	Chondrichthyes	Echinorhinidae	Echinorhinus brucus	EN	26.003	46.7253	12.1286	NO	0	0	0	Decreasing
79680099	Amphibians	Microhylidae	Stumpffia analamaina	CR	8.93693	13.594	12.1101	YES	0	0	0	Decreasing
55253	Amphibians	Aromobatidae	Aromobates alboguttatus	CR	7.01534	13.192	12.0951	YES	0	1	0	Decreasing
55258	Amphibians	Aromobatidae	Aromobates molinarii	CR	9.1052	13.412	12.0688	YES	0	0	0	Decreasing
74724558	Amphibians	Phrynobatrachidae	Phrynobatrachus jimzimkusi	CR	10.8375	13.6791	12.0618	YES	0	0	0	Decreasing
55465	Amphibians	Hylidae	Ptychohyla dendrophasma	CR	11.6243	13.2781	12.0548	YES	0	0	0	Decreasing
55257	Amphibians	Aromobatidae	Aromobates meridensis	CR	11.8509	13.673	12.0524	YES	0	0	0	Decreasing
22685219	Birds	Psittacidae	Lathamus discolor	CR	13.2817	13.2961	12.0445	YES	0	0	0	Decreasing
56851	Amphibians	Eleutherodactylidae	Eleutherodactylus pezopetrus	CR	11.0817	13.197	11.9892	YES	0	0	1	Decreasing
75976755	Lepidosaurs	Chamaeleonidae	Rhampholeon hattinghi	CR	10.4978	13.1867	11.9718	YES	0	0	0	Decreasing
136186	Amphibians	Microhylidae	Plethodontohyla fonetana	EN	21.033	24.8157	11.9632	YES	0	0	0	Decreasing
169384	Ray-finned fish	Rivulidae	Cynodonichthys kuelpmanni	CR	11.508	13.0422	11.963	YES	0	0	0	Unknown
47103060	Lepidosaurs	Scincidae	Panopa croizati	CR	12.7943	13.0862	11.9506	YES	0	0	0	Decreasing
57368	Amphibians	Telmatobiidae	Telmatobius vilamensis	CR	3.38523	12.9485	11.9417	YES	0	0	0	Decreasing
22697583	Birds	Balaenicipitidae	Balaeniceps rex	VU	51.5492	51.6447	11.9207	YES	0	0	0	Decreasing
2593	Lepidosaurs	Scincidae	Barkudia insularis	CR	6.71231	13.1188	11.9074	YES	0	0	0	Unknown
22697548	Birds	Threskiornithidae	Nipponia nippon	EN	23.993	24.2579	11.8999	YES	0	0	0	Increasing
109480565	Lepidosaurs	Scincidae	Nangura spinosa	EN	24.0746	24.0746	11.8806	YES	0	0	0	Decreasing
190988	Amphibians	Plethodontidae	Cryptotriton sierraminensis	CR	5.88005	13.0837	11.873	YES	0	0	0	Stable
61761	Amphibians	Bufonidae	Werneria iboundji	CR	3.35733	13.1917	11.8661	YES	0	0	0	Decreasing
22689335	Birds	Strigidae	Heteroglaux blewitti	EN	24.4207	24.4212	11.8657	YES	0	0	0	Decreasing
57335	Amphibians	Telmatobiidae	Telmatobius dankoi	CR	3.39507	13.324	11.8436	YES	0	0	0	Decreasing
10309	Testudines	Chelidae	Hydromedusa maximiliani	VU	39.6185	49.1454	11.8162	YES	0	0	1	NA
172794	Lepidosaurs	Gekkonidae	Lygodactylus mirabilis	CR	12.718	13.0359	11.8019	YES	0	0	0	Unknown
172943	Lepidosaurs	Gekkonidae	Uroplatus pietschmanni	EN	23.447	24.8501	11.7898	YES	0	0	0	Unknown
NA	Lepidosaurs	Gerrhosauridae	Broadleysaurus major	NA	47.5899	47.5899	11.7884	NO	0	0	0	NA
197297	Ray-finned fish	Galaxiidae	Galaxias prognathus	CR	11.4653	12.7908	11.7741	YES	0	0	0	Decreasing
56418	Amphibians	Craugastoridae	Craugastor angelicus	CR	11.2507	13.0056	11.7638	YES	0	0	0	Decreasing
61836	Amphibians	Mantellidae	Boophis sambirano	EN	17.1376	24.2388	11.7548	YES	0	0	0	Decreasing
NA	Testudines	Chelidae	Chelus fimbriata	NA	54.457	54.457	11.7448	NO	0	0	0	NA
87633164	Amphibians	Plethodontidae	Thorius schmidti	CR	7.93451	12.8067	11.7421	YES	0	0	0	Decreasing
56765	Amphibians	Craugastoridae	Craugastor milesi	CR	7.03382	13.0005	11.7219	YES	0	0	0	Unknown
91311866	Ray-finned fish	Osphronemidae	Parosphromenus gunawani	CR	9.9289	13.1016	11.6921	YES	0	0	0	Unknown
22695185	Birds	Accipitridae	Necrosyrtes monachus	CR	12.8515	12.8656	11.6731	YES	0	0	0	Decreasing
57505	Amphibians	Mantellidae	Boehmantis microtympanum	VU	48.9909	48.9909	11.6693	YES	0	0	0	Decreasing
19951	Ray-finned fish	Pseudomugilidae	Scaturiginichthys vermeilipinnis	CR	4.55734	12.9148	11.6436	YES	0	0	0	Decreasing
57959	Amphibians	Microhylidae	Cophyla milloti	EN	23.4452	25.2527	11.6324	YES	0	0	0	Decreasing
74995782	Lepidosaurs	Dactyloidae	Anolis luciae	EN	19.8882	25.6088	11.622	YES	0	0	0	Decreasing
104679625	Lepidosaurs	Dibamidae	Dibamus bogadeki	EN	18.1376	24.1161	11.6124	YES	0	0	0	Unknown
NA	Ray-finned fish	Scophthalmidae	Scophthalmus aquosus	NA	49.6731	49.6731	11.6106	NO	0	0	0	NA
173018	Amphibians	Nyctibatrachidae	Nyctibatrachus dattatreyaensis	CR	12.5804	12.8371	11.574	YES	0	0	0	Unknown
54461	Amphibians	Bufonidae	Rhaebo atelopoides	CR	4.35989	12.9291	11.5712	YES	0	0	0	Decreasing
161698	Chondrichthyes	Dasyatidae	Makararaja chindwinensis	DD	48.3089	48.4021	11.5706	NO	0	0	0	Unknown
197294	Ray-finned fish	Galaxiidae	Galaxias macronasus	CR	8.12194	12.544	11.5529	YES	0	0	0	Decreasing
64370	Lepidosaurs	Xenosauridae	Xenosaurus newmanorum	EN	16.6589	24.4055	11.5522	YES	0	0	1	Decreasing
39329	Chondrichthyes	Squatinidae	Squatina argentina	CR	7.66203	12.7538	11.5392	NO	0	0	0	Decreasing
135750	Amphibians	Microhylidae	Plethodontohyla guentheri	EN	20.42	24.5511	11.5326	YES	0	0	0	Decreasing
NA	Chondrichthyes	Pristidae	Pristis microdon	NA	25.0241	59.1021	11.523	NO	0	0	0	NA
197288	Ray-finned fish	Galaxiidae	Galaxias cobitinis	CR	8.12194	12.621	11.518	YES	0	0	0	Unknown
59370	Amphibians	Plethodontidae	Pseudoeurycea aurantia	CR	2.3093	12.7398	11.5158	YES	0	0	0	Decreasing
161465	Chondrichthyes	Dasyatidae	Pastinachus solocirostris	EN	21.8223	23.6451	11.5136	YES	0	0	0	Decreasing
714	Mammals	Ailuridae	Ailurus fulgens	EN	23.5443	23.5443	11.5085	YES	0	0	0	Decreasing
59237	Amphibians	Plethodontidae	Dendrotriton bromeliacius	CR	11.7533	12.6785	11.4875	YES	0	0	0	Decreasing
49562307	Amphibians	Mantellidae	Gephyromantis atsingy	EN	23.4368	24	11.4741	YES	0	0	0	Decreasing
61334	Ray-finned fish	Sciaenidae	Bahaba taipingensis	CR	8.12386	12.9332	11.4599	YES	0	0	0	Decreasing
194306	Ray-finned fish	Albulidae	Pterothrissus gissu	NA	15.4736	51.9956	11.4465	NO	0	0	0	Unknown
10215	Amphibians	Craugastoridae	Holoaden bradei	CR	10.2312	12.492	11.437	YES	0	1	1	Decreasing
47143971	Amphibians	Rhacophoridae	Rhacophorus vampyrus	EN	20.7562	23.7628	11.4266	YES	0	0	0	NA
18383	Ray-finned fish	Retropinnidae	Prototroctes maraena	VU	47.5509	47.5512	11.4	YES	0	0	0	Decreasing
175361	Amphibians	Arthroleptidae	Arthroleptis langeri	EN	22.9397	24.2821	11.3651	YES	0	0	0	Decreasing
194305	Ray-finned fish	Albulidae	Nemoossis belloci	NA	15.4736	52.6559	11.3603	NO	0	0	0	Unknown
39596	Testudines	Geoemydidae	Heosemys depressa	CR	10.6148	12.6048	11.358	YES	0	0	0	Decreasing
99943609	Lepidosaurs	Gekkonidae	Cnemaspis temiah	CR	12.405	12.4975	11.356	YES	0	0	0	Decreasing
132523146	Ray-finned fish	Goodeidae	Hubbsina turneri	CR	11.6471	11.8737	11.3475	YES	0	0	0	Decreasing
22697742	Birds	Fregatidae	Fregata andrewsi	CR	12.5292	12.6555	11.3408	YES	0	0	0	Decreasing
56302	Amphibians	Eleutherodactylidae	Adelophryne maranguapensis	EN	21.1914	23.9606	11.3349	YES	0	0	1	Decreasing
39352	Chondrichthyes	Triakidae	Galeorhinus galeus	CR	50.8119	52.5814	11.3336	YES	0	0	0	NA
57515	Amphibians	Mantellidae	Guibemantis punctatus	CR	12.1849	12.5819	11.3303	YES	0	0	0	Decreasing
18398	Testudines	Testudinidae	Psammobates geometricus	CR	10.6594	12.3383	11.3155	YES	0	0	0	Decreasing
85341796	Amphibians	Hylidae	Ecnomiohyla rabborum	CR	4.98716	12.5053	11.3081	YES	0	1	0	Decreasing
22920	Mammals	Lemuridae	Varecia rubra	CR	0.925376	12.3623	11.3069	YES	0	0	0	Decreasing
55568	Amphibians	Hylidae	Megastomatohyla mixomaculata	EN	5.97754	23.251	11.3	YES	0	0	0	Decreasing
59395	Amphibians	Plethodontidae	Pseudoeurycea saltator	CR	0.751878	12.6934	11.2995	YES	0	0	0	Decreasing
22918	Mammals	Lemuridae	Varecia variegata	CR	0.924814	12.4624	11.2946	YES	0	0	0	Decreasing
NA	Ray-finned fish	Polycentridae	Monocirrhus polyacanthus	NA	36.4915	39.814	11.2894	NO	0	0	0	NA
89183450	Amphibians	Plethodontidae	Cryptotriton xucaneborum	CR	5.65459	12.3585	11.2821	YES	0	0	0	Decreasing
6229	Chondrichthyes	Dalatiidae	Dalatias licha	VU	41.7102	42.57	11.2697	NO	0	0	0	Decreasing
61803	Amphibians	Craugastoridae	Craugastor nefrens	CR	8.55825	12.731	11.2434	YES	0	0	0	Decreasing
169811	Lepidosaurs	Scincidae	Brachymeles cebuensis	CR	10.7759	12.4343	11.2401	YES	0	0	1	Decreasing
59228	Amphibians	Plethodontidae	Chiropterotriton mosaueri	CR	5.75642	12.3017	11.2299	YES	0	0	0	Unknown
55098	Amphibians	Dendrobatidae	Colostethus jacobuspetersi	CR	10.0729	12.5559	11.2263	YES	0	0	0	Decreasing
59222	Amphibians	Plethodontidae	Chiropterotriton chiropterus	CR	5.67721	12.6166	11.2196	YES	0	0	0	Decreasing
54463	Amphibians	Bufonidae	Rhaebo olallai	CR	3.90128	12.2285	11.217	YES	0	0	0	Decreasing
5263	Amphibians	Conrauidae	Conraua goliath	EN	21.3813	23.0273	11.1969	YES	0	0	0	Decreasing
12761	Mammals	Manidae	Manis crassicaudata	EN	5.15424	22.9531	11.1949	YES	0	0	0	Decreasing
56876	Amphibians	Craugastoridae	Craugastor pozo	CR	7.84177	12.2326	11.192	YES	0	0	0	Decreasing
NA	Amphibians	Chikilidae	Chikila gaiduwani	NA	33.0279	49.8998	11.1666	NO	0	0	0	NA
135870	Amphibians	Hynobiidae	Pseudohynobius kuankuoshuiensis	CR	10.7332	12.3376	11.1638	YES	0	0	0	Unknown
59238	Amphibians	Plethodontidae	Dendrotriton cuchumatanus	CR	6.00473	12.2398	11.1611	YES	0	0	0	Decreasing
57019	Amphibians	Eleutherodactylidae	Eleutherodactylus turquinensis	CR	11.5784	12.3824	11.1512	YES	0	0	1	Decreasing
57362	Amphibians	Telmatobiidae	Telmatobius simonsi	CR	8.68446	12.2135	11.1223	YES	0	0	0	Decreasing
55872	Amphibians	Hylidae	Plectrohyla chrysopleura	CR	5.62094	12.1722	11.1209	YES	0	0	0	Decreasing
164583	Lepidosaurs	Lacertidae	Eremias pleskei	CR	11.4928	12.2662	11.1187	YES	0	0	1	Decreasing
194310	Amphibians	Plethodontidae	Dendrotriton chujorum	CR	6.00473	12.272	11.11	YES	0	0	0	Unknown
19796	Testudines	Geoemydidae	Sacalia bealei	EN	17.1404	23.1275	11.1043	YES	0	0	1	NA
9944	Ray-finned fish	Terapontidae	Hephaestus adamsoni	CR	10.9636	12.5839	11.0902	YES	0	0	0	Decreasing
54896	Amphibians	Bufonidae	Werneria tandyi	CR	0.820392	12.19	11.0553	YES	0	0	0	Decreasing
174664	Amphibians	Pyxicephalidae	Arthroleptella rugosa	CR	11.9404	12.2461	11.0518	YES	0	0	0	Decreasing
54894	Amphibians	Bufonidae	Werneria mertensiana	CR	0.756526	12.2864	11.0453	YES	0	0	0	Decreasing
3854	Chondrichthyes	Odontaspididae	Carcharias taurus	VU	19.1478	46.5981	11.0425	YES	0	0	0	Decreasing
60177	Chondrichthyes	Trygonorrhinidae	Zapteryx exasperata	DD	40.0826	58.4214	11.0394	NO	0	0	0	Unknown
15323	Ray-finned fish	Salmonidae	Oncorhynchus formosanus	CR	13.649	13.649	11.0391	YES	0	0	1	NA
107604987	Chondrichthyes	Dasyatidae	Maculabatis arabica	CR	9.47734	11.7806	11.0347	NO	0	0	0	Decreasing
5961	Testudines	Geoemydidae	Cuora mccordi	CR	9.46349	12.2792	11.0286	YES	0	0	1	NA
61418	Chondrichthyes	Squatinidae	Squatina oculata	CR	7.66454	12.0459	11.023	NO	0	0	0	Decreasing
56396	Amphibians	Craugastoridae	Craugastor adamastus	CR	7.58167	12.0702	11.0066	YES	0	1	0	Unknown
172568	Lepidosaurs	Chamaeleonidae	Rhampholeon chapmanorum	CR	8.37955	12.2292	10.9955	YES	0	0	0	Decreasing
57435	Amphibians	Mantellidae	Boophis williamsi	CR	11.4837	12.0197	10.9901	YES	0	0	0	Decreasing
59498	Amphibians	Herpelidae	Boulengerula taitana	EN	17.3074	22.7276	10.9529	YES	0	0	0	Decreasing
NA	Ray-finned fish	Mugilidae	Neomyxus leuciscus	NA	42.2479	43.8373	10.9494	NO	0	0	0	NA
59223	Amphibians	Plethodontidae	Chiropterotriton chondrostega	EN	17.9758	23.5206	10.9476	YES	0	0	0	Decreasing
59447	Amphibians	Salamandridae	Echinotriton chinhaiensis	CR	10.3174	12.3137	10.9475	YES	0	0	1	Decreasing
61920	Amphibians	Herpelidae	Boulengerula niedeni	EN	17.3858	22.5015	10.9336	YES	0	0	0	Unknown
19797	Testudines	Geoemydidae	Sacalia quadriocellata	EN	17.1404	23.2916	10.9186	YES	0	0	0	Decreasing
55254	Amphibians	Aromobatidae	Aromobates duranti	CR	7.63816	11.9037	10.911	YES	0	0	0	Decreasing
59401	Amphibians	Plethodontidae	Pseudoeurycea unguidentis	CR	6.97153	12.3346	10.9045	YES	0	1	0	Decreasing
56942	Amphibians	Craugastoridae	Craugastor saltuarius	CR	7.32775	11.8431	10.9026	YES	0	1	0	Decreasing
56888	Amphibians	Craugastoridae	Craugastor punctariolus	CR	6.3057	12.1881	10.897	YES	0	1	0	Decreasing
59559	Amphibians	Indotyphlidae	Hypogeophis brevis	EN	22.872	22.939	10.8925	YES	0	0	0	Unknown
60344	Ray-finned fish	Anguillidae	Anguilla anguilla	CR	8.74771	11.5831	10.8756	YES	0	0	0	Decreasing
NA	Testudines	Chelidae	Hydromedusa tectifera	NA	39.6185	47.6339	10.8586	NO	0	0	0	NA
22724459	Birds	Cuculidae	Carpococcyx viridis	CR	8.2671	11.8364	10.8503	YES	0	0	0	Decreasing
58175	Amphibians	Pipidae	Xenopus largeni	EN	20.1157	22.7942	10.845	YES	0	0	0	Unknown
59644	Amphibians	Rhinatrematidae	Epicrionops parkeri	VU	35.0406	46.304	10.8411	YES	0	0	0	Unknown
21652	Testudines	Testudinidae	Testudo kleinmanni	CR	11.3724	11.8376	10.8403	YES	0	0	1	Decreasing
136168	Amphibians	Microhylidae	Anodonthyla hutchisoni	EN	21.78	22.6917	10.8363	YES	0	0	0	Decreasing
48101669	Amphibians	Megophryidae	Leptobrachella firthi	EN	14.7092	22.3955	10.8319	NO	0	0	0	Decreasing
186159	Amphibians	Rhacophoridae	Raorchestes chlorosomma	CR	11.6796	12.0373	10.827	YES	0	0	0	Unknown
68568328	Amphibians	Mantellidae	Boophis ankarafensis	CR	10.3619	11.7846	10.7843	YES	0	0	0	Decreasing
59227	Amphibians	Plethodontidae	Chiropterotriton magnipes	EN	19.4422	22.6611	10.7761	YES	0	0	0	Decreasing
56582	Amphibians	Craugastoridae	Craugastor epochthidius	CR	6.93179	11.8403	10.765	YES	0	1	0	Decreasing
193482	Lepidosaurs	Chamaeleonidae	Calumma tarzan	CR	11.8195	11.8435	10.7359	YES	0	0	0	Decreasing
176323	Lepidosaurs	Chamaeleonidae	Rhampholeon spinosus	EN	19.7756	22.5671	10.7311	YES	0	0	0	Decreasing
60209	Chondrichthyes	Squalidae	Cirrhigaleus asper	DD	54.8148	57.2609	10.7016	NO	0	0	0	Unknown
56730	Amphibians	Eleutherodactylidae	Eleutherodactylus lucioi	CR	5.66947	11.8046	10.6834	NO	0	0	1	Decreasing
61909	Amphibians	Plethodontidae	Pseudoeurycea obesa	CR	7.86585	11.5672	10.683	YES	0	0	0	Unknown
182909	Ray-finned fish	Anabantidae	Ctenopoma nebulosum	EN	20.1852	22.4064	10.6694	YES	0	0	0	Unknown
42760243	Lepidosaurs	Chamaeleonidae	Rhampholeon gorongosae	EN	19.4316	22.2681	10.6644	YES	0	0	0	Decreasing
NA	Lepidosaurs	Scincidae	Sphenomorphus sarasinorum	NA	41.0151	41.0489	10.6621	NO	0	0	0	NA
39367	Chondrichthyes	Carcharhinidae	Carcharhinus borneensis	EN	21.7009	23.2062	10.6588	YES	0	0	0	Decreasing
18067	Ray-finned fish	Cyprinidae	Poropuntius tawarensis	CR	8.43082	11.3007	10.6305	YES	0	0	0	Decreasing
4615	Testudines	Cheloniidae	Chelonia mydas	EN	17.9901	21.6008	10.6176	YES	0	0	1	Decreasing
55104	Amphibians	Aromobatidae	Aromobates leopardalis	CR	6.25431	11.6769	10.6065	YES	0	1	0	Decreasing
97357437	Testudines	Geoemydidae	Cuora galbinifrons	CR	6.93186	11.6676	10.5826	YES	0	0	0	Decreasing
102664572	Lepidosaurs	Carphodactylidae	Phyllurus kabikabi	CR	9.75411	11.6399	10.5789	YES	0	0	0	Unknown
58488	Amphibians	Ranidae	Pterorana khare	VU	39.7846	46.2498	10.5718	YES	0	0	1	Decreasing
97210381	Lepidosaurs	Gekkonidae	Cnemaspis psychedelica	EN	20.2715	22.5077	10.5708	YES	0	0	0	Unknown
203186	Lepidosaurs	Xantusiidae	Cricosaura typica	NT	82.7719	82.7719	10.5683	NO	0	0	0	Stable
19889	Ray-finned fish	Anabantidae	Sandelia bainsii	EN	13.2206	22.7404	10.5524	YES	0	0	0	Decreasing
171728748	Chondrichthyes	Pristiophoridae	Pliotrema warreni	LC	87.442	87.442	10.5285	NO	0	0	0	Stable
77342769	Amphibians	Aromobatidae	Aromobates walterarpi	CR	6.40067	11.3742	10.5279	YES	0	0	0	Decreasing
136130	Amphibians	Telmatobiidae	Telmatobius espadai	CR	8.14473	11.5627	10.5106	YES	0	1	0	Decreasing
54898	Amphibians	Bufonidae	Wolterstorffina mirei	EN	7.51097	21.8488	10.4912	YES	0	0	0	Decreasing
59410	Amphibians	Plethodontidae	Thorius dubitus	CR	9.86674	11.4622	10.4816	YES	0	0	0	Decreasing
59152	Amphibians	Plethodontidae	Bolitoglossa decora	CR	10.893	11.8883	10.4772	YES	0	0	0	Decreasing
10826	Mammals	Indriidae	Indri indri	CR	11.2378	11.2378	10.4424	YES	0	0	0	Decreasing
6494	Testudines	Dermochelyidae	Dermochelys coriacea	VU	44.1556	44.3893	10.4419	YES	0	0	0	Decreasing
59304	Amphibians	Plethodontidae	Nyctanolis pernix	VU	45.1578	45.3988	10.4228	YES	0	0	0	Decreasing
54420	Amphibians	Arthroleptidae	Astylosternus nganhanus	CR	9.17268	11.1351	10.4225	YES	0	0	0	Decreasing
19740	Ray-finned fish	Percidae	Romanichthys valsanicola	CR	10.7332	10.8361	10.4157	YES	0	0	1	Unknown
22695289	Birds	Accipitridae	Terathopius ecaudatus	EN	21.6532	21.6532	10.4131	YES	0	0	0	Decreasing
59016	Amphibians	Rhacophoridae	Rhacophorus pseudomalabaricus	CR	10.8366	11.3557	10.4131	YES	0	0	1	Decreasing
172834	Lepidosaurs	Scincidae	Pseudoacontias menamainty	CR	6.96982	11.5717	10.376	YES	0	0	0	Unknown
54490	Amphibians	Bufonidae	Atelopus arthuri	CR	4.60993	11.405	10.3686	YES	0	0	1	Decreasing
172948	Lepidosaurs	Gekkonidae	Phelsuma serraticauda	EN	21.3904	21.4048	10.351	YES	0	0	0	Decreasing
20795	Ray-finned fish	Polyprionidae	Stereolepis gigas	CR	5.51692	11.2411	10.3345	YES	0	0	1	Unknown
172706	Lepidosaurs	Scincidae	Eurylepis poonaensis	EN	8.64051	21.4979	10.3149	YES	0	0	1	Unknown
56996	Amphibians	Craugastoridae	Craugastor taylori	CR	8.23964	11.5524	10.3131	YES	0	0	0	Unknown
NA	Ray-finned fish	Valenciidae	Valencia robertae	NA	6.44979	43.2723	10.3123	NO	0	0	0	NA
75601781	Lepidosaurs	Leptotyphlopidae	Mitophis pyrites	EN	4.94466	21.247	10.306	YES	0	0	0	Unknown
49830568	Ray-finned fish	Heptapteridae	Phreatobius sanguijuela	CR	4.28439	11.4394	10.3005	YES	0	0	0	Unknown
881	Ray-finned fish	Goodeidae	Allotoca maculata	CR	9.74501	10.7953	10.3	YES	0	0	0	Decreasing
15944	Ray-finned fish	Pangasiidae	Pangasianodon gigas	CR	10.757	12.4031	10.2861	YES	0	0	0	Decreasing
NA	Ray-finned fish	Belonidae	Platybelone lovii	NA	41.7345	41.7345	10.2852	NO	0	0	0	NA
39378	Chondrichthyes	Carcharhinidae	Galeocerdo cuvier	NT	84.9461	84.9461	10.2723	NO	0	0	0	Decreasing
98393682	Lepidosaurs	Eublepharidae	Goniurosaurus zhelongi	EN	6.26039	21.5118	10.2703	YES	0	0	0	Decreasing
56761	Amphibians	Craugastoridae	Craugastor merendonensis	CR	6.53666	11.1209	10.2074	YES	1	1	0	Unknown
58405	Amphibians	Nyctibatrachidae	Nyctibatrachus vasanthi	EN	21.6836	21.7618	10.2011	YES	0	0	1	Decreasing
54360	Amphibians	Plethodontidae	Cryptotriton monzoni	CR	5.90125	11.2776	10.1867	YES	0	0	0	Decreasing
56649	Amphibians	Craugastoridae	Strabomantis helonotus	CR	7.6934	11.2762	10.16	YES	0	0	1	Decreasing
56742	Amphibians	Eleutherodactylidae	Eleutherodactylus mariposa	CR	9.7335	11.2649	10.1571	YES	0	0	1	Decreasing
172827	Lepidosaurs	Gekkonidae	Paragehyra gabriellae	EN	14.2212	21.8224	10.1452	YES	0	0	0	Decreasing
161695	Chondrichthyes	Hemigaleidae	Chaenogaleus macrostoma	VU	45.1918	45.3222	10.1383	YES	0	0	0	Decreasing
54684	Amphibians	Bufonidae	Xanthophryne koynayensis	EN	7.40923	20.394	10.1306	YES	0	0	1	Decreasing
74995512	Lepidosaurs	Dactyloidae	Anolis insolitus	EN	16.236	20.2864	10.1253	YES	0	0	0	Unknown
56725	Amphibians	Eleutherodactylidae	Eleutherodactylus locustus	CR	6.15405	11.0636	10.1208	YES	0	0	0	Decreasing
22685533	Birds	Psittacidae	Cyanopsitta spixii	EW	11.1916	11.1935	10.1176	YES	0	0	0	NA
190982	Amphibians	Arthroleptidae	Arthroleptis perreti	EN	20.7909	21.3558	10.1126	YES	0	0	1	Unknown
161546	Chondrichthyes	Dasyatidae	Urogymnus lobistoma	EN	46.3089	46.5918	10.1037	NO	0	0	0	Decreasing
59423	Amphibians	Plethodontidae	Thorius papaloae	CR	9.99927	11.1498	10.096	YES	0	0	0	Decreasing
56498	Amphibians	Craugastoridae	Craugastor catalinae	CR	6.9025	11.4521	10.0828	YES	0	1	0	Decreasing
163447	Testudines	Geoemydidae	Cuora bourreti	CR	1.4115	11.1968	10.0814	YES	0	0	0	Decreasing
88383344	Amphibians	Hynobiidae	Pachyhynobius shangchengensis	VU	42.3665	42.4358	10.0791	YES	0	0	0	Decreasing
64373	Lepidosaurs	Xenosauridae	Xenosaurus platyceps	EN	16.3578	20.4791	10.0733	YES	0	0	1	Decreasing
22730	Ray-finned fish	Umbridae	Umbra krameri	VU	42.2034	42.3497	10.0581	YES	0	0	1	Decreasing
57125	Amphibians	Leptodactylidae	Leptodactylus fallax	CR	10.8791	11.2124	10.0418	YES	0	0	0	Decreasing
39333	Chondrichthyes	Heterodontidae	Heterodontus francisci	DD	34.0597	39.3989	10.0403	NO	0	0	0	Unknown
163463	Testudines	Geoemydidae	Cuora picturata	CR	1.41382	11.2352	10.0383	YES	0	0	0	Decreasing
51061032	Amphibians	Plethodontidae	Nototriton tomamorum	CR	10.3233	11.1101	10.0356	YES	0	0	0	Decreasing
NA	Ray-finned fish	Scopelarchidae	Benthalbella macropinna	NA	45.844	45.8441	10.0284	NO	0	0	0	NA
12775	Testudines	Testudinidae	Manouria impressa	VU	21.6418	42.5093	10.0274	YES	0	0	0	Decreasing
9402	Testudines	Testudinidae	Gopherus flavomarginatus	CR	8.72867	11.0805	10.0245	YES	0	0	0	Decreasing
75605902	Lepidosaurs	Sphaerodactylidae	Sphaerodactylus shrevei	EN	13.1018	20.1044	10.0083	YES	0	0	0	Decreasing
12646	Mammals	Nesomyidae	Macrotarsomys ingens	EN	21.461	21.6285	10.0015	YES	0	0	0	Decreasing
22712042	Birds	Hirundinidae	Eurochelidon sirintarae	CR	6.04848	10.9443	9.98919	YES	0	0	0	Decreasing
NA	Lepidosaurs	Eublepharidae	Hemitheconyx taylori	NA	38.2712	39.0404	9.9873	NO	0	0	0	NA
7150	Amphibians	Eleutherodactylidae	Eleutherodactylus eneidae	CR	5.84968	10.9879	9.97894	YES	0	1	0	Unknown
104023514	Chondrichthyes	Myliobatidae	Aetomylaeus milvus	EN	12.1015	20.2135	9.97802	NO	0	0	0	Decreasing
169845	Lepidosaurs	Gekkonidae	Luperosaurus joloensis	EN	15.673	20.7794	9.95685	YES	0	0	0	Decreasing
21581	Amphibians	Telmatobiidae	Telmatobius atacamensis	CR	6.11733	10.8676	9.94857	YES	0	0	0	Decreasing
54635	Amphibians	Bufonidae	Incilius fastidiosus	CR	10.7356	11.0495	9.92628	YES	0	1	0	Decreasing
18655	Mammals	Pteropodidae	Mirimiri acrodonta	CR	10.6753	10.9319	9.92377	YES	0	0	0	Decreasing
23179	Mammals	Tachyglossidae	Zaglossus bruijni	CR	6.27759	11.015	9.92292	YES	0	0	0	Decreasing
56665	Amphibians	Craugastoridae	Craugastor inachus	CR	6.98267	10.8085	9.9088	YES	0	0	0	Decreasing
54471	Amphibians	Bufonidae	Ansonia latidisca	EN	21.8411	22.5761	9.90809	YES	0	0	0	Decreasing
143828186	Amphibians	Craugastoridae	Craugastor castanedai	CR	7.15611	10.6755	9.90554	NO	0	0	0	Decreasing
49546770	Amphibians	Mantellidae	Boophis tsilomaro	CR	8.69717	10.8775	9.90007	YES	0	0	0	Decreasing
56863	Amphibians	Eleutherodactylidae	Eleutherodactylus pituinus	EN	20.0686	20.995	9.8979	YES	0	0	1	Decreasing
161613	Chondrichthyes	Torpedinidae	Torpedo suessii	CR	7.33409	10.9186	9.89721	NO	0	1	0	Unknown
58805	Amphibians	Rhacophoridae	Theloderma moloch	VU	44.7991	45.5137	9.87707	NO	0	0	1	Decreasing
9942	Testudines	Geoemydidae	Heosemys spinosa	EN	19.7428	20.3264	9.87568	YES	0	0	0	Decreasing
202435	Ray-finned fish	Percidae	Crystallaria cincotta	CR	8.49967	10.3393	9.87341	YES	0	0	0	Decreasing
178272	Lepidosaurs	Dactyloidae	Anolis cusuco	EN	13.4206	19.9717	9.87195	YES	0	0	0	Decreasing
45536685	Amphibians	Telmatobiidae	Telmatobius mendelsoni	CR	6.07535	10.8545	9.86673	YES	0	1	0	Decreasing
61749	Amphibians	Bufonidae	Nannophryne apolobambica	CR	6.82284	10.9438	9.86602	YES	0	0	0	Decreasing
58161	Amphibians	Pipidae	Pipa myersi	EN	19.2572	20.4661	9.85896	YES	0	0	0	Decreasing
176164	Lepidosaurs	Scincidae	Nannoscincus exos	CR	10.5274	10.7095	9.84894	YES	0	0	0	Decreasing
56485	Amphibians	Craugastoridae	Strabomantis cadenai	CR	7.90469	10.806	9.84131	YES	0	1	0	Unknown
55492	Amphibians	Hylidae	Isthmohyla graceae	CR	5.63735	10.9423	9.83824	YES	0	0	0	Decreasing
57337	Amphibians	Telmatobiidae	Telmatobius edaphonastes	CR	5.75834	10.5871	9.83457	YES	0	1	0	Decreasing
57354	Amphibians	Telmatobiidae	Telmatobius philippii	CR	6.11023	10.7548	9.8293	YES	0	0	0	Decreasing
61835	Amphibians	Telmatobiidae	Telmatobius timens	CR	6.09225	10.8466	9.82493	YES	0	0	0	Decreasing
56516	Amphibians	Craugastoridae	Craugastor coffeus	CR	6.76702	10.8663	9.82458	YES	0	0	0	Decreasing
14506	Ray-finned fish	Galaxiidae	Neochanna diversus	EN	20.1713	20.5859	9.82366	YES	0	0	0	Decreasing
195320	Chondrichthyes	Dasyatidae	Urogymnus polylepis	EN	14.2809	19.9806	9.82334	NO	0	0	0	Decreasing
78586413	Amphibians	Telmatobiidae	Telmatobius ventriflavum	CR	6.29841	10.7245	9.81632	YES	0	0	0	Decreasing
59363	Amphibians	Plethodontidae	Plethodon welleri	EN	20.0067	20.008	9.81115	YES	0	0	1	Decreasing
56853	Amphibians	Craugastoridae	Craugastor phasma	CR	6.6956	11.0156	9.80723	YES	0	1	0	Unknown
22684225	Birds	Cuculidae	Centropus steerii	CR	10.2029	10.8547	9.80368	YES	0	0	0	Decreasing
197043	Ray-finned fish	Mugilidae	Neochelon falcipinnis	NA	49.4726	49.4726	9.79574	NO	0	0	0	Unknown
7664	Testudines	Chelidae	Elusor macrurus	EN	17.6836	20.2835	9.79382	YES	0	0	1	NA
178498	Lepidosaurs	Xenophidiidae	Xenophidion acanthognathus	DD	28.2054	44.4488	9.78211	NO	0	0	0	Unknown
56807	Amphibians	Craugastoridae	Craugastor olanchano	CR	5.9802	10.6168	9.77975	YES	0	1	0	Decreasing
58849	Amphibians	Rhacophoridae	Raorchestes griet	CR	8.47716	10.6449	9.77682	YES	0	0	1	Decreasing
4055	Amphibians	Calyptocephalellidae	Calyptocephalella gayi	VU	41.7375	42.2431	9.77679	YES	0	0	0	Decreasing
75312135	Lepidosaurs	Leiocephalidae	Leiocephalus pratensis	CR	8.54718	10.86	9.77299	YES	1	1	0	Unknown
136322	Mammals	Tachyglossidae	Zaglossus attenboroughi	CR	6.19455	11.106	9.77255	YES	1	0	0	Decreasing
22682507	Birds	Bucerotidae	Berenicornis comatus	EN	17.1137	20.402	9.76938	YES	0	0	0	Decreasing
12119	Mammals	Lipotidae	Lipotes vexillifer	CR	10.6752	10.7206	9.76888	YES	0	1	0	Decreasing
58121	Amphibians	Phrynobatrachidae	Phrynobatrachus kinangopensis	VU	39.0267	42.0465	9.76344	YES	0	0	0	Decreasing
56541	Amphibians	Eleutherodactylidae	Eleutherodactylus cubanus	CR	10.1925	10.9486	9.7613	YES	0	0	1	Decreasing
57347	Amphibians	Telmatobiidae	Telmatobius laticeps	CR	5.63461	10.8657	9.74356	YES	0	1	0	Decreasing
54460	Amphibians	Bufonidae	Altiphrynoides malcolmi	EN	5.88396	19.7023	9.74246	YES	0	0	0	Decreasing
61802	Amphibians	Craugastoridae	Craugastor campbelli	CR	6.29662	10.7239	9.73868	YES	0	0	0	Decreasing
61366030	Lepidosaurs	Chamaeleonidae	Rhampholeon bruessoworum	CR	5.5603	10.9572	9.73598	YES	0	0	0	Decreasing
1272	Amphibians	Cryptobranchidae	Andrias davidianus	CR	6.69023	10.7269	9.73113	YES	0	0	1	Decreasing
172776	Lepidosaurs	Gekkonidae	Phelsuma vanheygeni	EN	20.1743	20.2784	9.72406	YES	0	0	0	Unknown
60219	Chondrichthyes	Carcharhinidae	Carcharhinus signatus	EN	38.6569	43.1395	9.7231	YES	0	0	0	NA
21583	Amphibians	Telmatobiidae	Telmatobius pefauri	CR	6.24007	10.7808	9.71899	YES	0	1	0	Unknown
57360	Amphibians	Telmatobiidae	Telmatobius scrocchii	CR	6.21949	10.8038	9.71006	YES	0	0	0	Decreasing
54410	Amphibians	Arthroleptidae	Cardioglossa trifasciata	CR	8.42978	10.4732	9.70379	YES	0	0	0	Decreasing
6009	Testudines	Trionychidae	Cycloderma frenatum	EN	16.5166	20.1157	9.69909	YES	0	0	0	Decreasing
4531	Ray-finned fish	Goodeidae	Characodon lateralis	CR	2.13305	10.7849	9.69716	YES	0	0	0	Decreasing
NA	Ray-finned fish	Mugilidae	Myxus elongatus	NA	42.2479	43.6885	9.69484	NO	0	0	0	NA
60199	Chondrichthyes	Mobulidae	Mobula tarapacana	EN	12.5268	19.2902	9.69415	YES	0	0	0	Decreasing
59645	Amphibians	Rhinatrematidae	Epicrionops peruvianus	DD	34.41	45.8822	9.69398	NO	0	0	0	Unknown
61885	Amphibians	Rhacophoridae	Raorchestes nerostagona	EN	19.5939	19.7986	9.68437	YES	0	0	1	Decreasing
161570	Chondrichthyes	Carcharhinidae	Lamiopsis temminckii	EN	9.789	19.9893	9.68031	YES	0	0	0	Decreasing
39369	Chondrichthyes	Carcharhinidae	Carcharhinus hemiodon	CR	7.66757	10.9738	9.67909	YES	0	0	0	Unknown
59416	Amphibians	Plethodontidae	Thorius magnipes	CR	7.79944	10.5585	9.66818	YES	0	0	0	Decreasing
161406	Chondrichthyes	Pentanchidae	Galeus sauteri	LC	44.8521	45.6267	9.66287	NO	0	0	0	Stable
58402	Amphibians	Nyctibatrachidae	Nyctibatrachus minor	EN	17.5208	19.8944	9.65971	YES	0	0	1	Decreasing
56913	Amphibians	Craugastoridae	Craugastor rhyacobatrachus	CR	6.111	10.9634	9.63248	YES	0	1	0	Decreasing
8819	Ray-finned fish	Galaxiidae	Galaxiella nigrostriata	EN	15.6656	19.8758	9.62886	YES	0	0	0	Decreasing
57331	Amphibians	Telmatobiidae	Telmatobius cirrhacelis	CR	5.51821	10.758	9.62576	YES	0	1	1	Decreasing
18435530	Amphibians	Bufonidae	Atelopus orcesi	CR	4.3645	10.6252	9.62023	YES	0	1	0	Decreasing
91309381	Ray-finned fish	Osphronemidae	Betta cracens	CR	9.48342	10.5414	9.60997	YES	0	0	0	Unknown
8805	Ray-finned fish	Galaxiidae	Galaxias fontanus	EN	15.0154	19.3793	9.59955	YES	0	0	0	Decreasing
12244	Ray-finned fish	Mugilidae	Liza luciae	EN	18.7364	20.9156	9.59612	YES	0	0	1	NA
202432	Ray-finned fish	Centrarchidae	Archoplites interruptus	EN	19.6285	19.6322	9.59515	YES	0	0	0	Decreasing
172529	Lepidosaurs	Chamaeleonidae	Rhampholeon temporalis	EN	16.341	20.5091	9.58657	YES	0	0	0	Decreasing
55432	Amphibians	Hylidae	Isthmohyla calypsa	CR	6.45376	10.7249	9.58062	YES	0	1	0	Unknown
6031	Lepidosaurs	Iguanidae	Cyclura pinguis	CR	10.4729	10.5953	9.57111	YES	0	0	0	Increasing
172740	Lepidosaurs	Chamaeleonidae	Furcifer belalandaensis	CR	10.5066	10.5339	9.56209	YES	0	0	0	Decreasing
172876	Lepidosaurs	Gekkonidae	Uroplatus malama	VU	40.3805	40.5768	9.55044	YES	0	0	0	Decreasing
154426201	Lepidosaurs	Dactyloidae	Anolis sminthus	EN	18.3828	21.0558	9.54901	YES	0	0	0	Decreasing
194100	Lepidosaurs	Gekkonidae	Cyrtodactylus jeyporensis	CR	9.3495	10.7017	9.54233	YES	0	0	0	Unknown
104677699	Lepidosaurs	Agamidae	Physignathus cocincinus	VU	42.2242	42.8507	9.53927	YES	0	0	0	Decreasing
55685	Amphibians	Hylidae	Ecnomiohyla valancifer	CR	5.87304	10.5639	9.53838	NO	0	0	0	Unknown
57330	Amphibians	Telmatobiidae	Telmatobius ceiorum	CR	5.8567	10.2139	9.52312	YES	0	1	0	Decreasing
60411	Ray-finned fish	Cyprinodontidae	Aphanius sirhani	CR	11.7615	11.7632	9.50387	YES	0	0	0	Stable
59088	Amphibians	Hynobiidae	Batrachuperus yenyuanensis	EN	19.0289	19.1468	9.49948	YES	0	0	0	Decreasing
54427	Amphibians	Arthroleptidae	Leptodactylodon axillaris	CR	4.18453	10.4955	9.49159	YES	0	0	0	Unknown
59551	Amphibians	Chikilidae	Chikila fulleri	DD	31.5997	47.8428	9.48885	NO	1	0	1	Unknown
19085174	Ray-finned fish	Cobitidae	Cobitis kellei	CR	10.7895	10.9662	9.48275	YES	0	1	0	Unknown
59641	Amphibians	Rhinatrematidae	Epicrionops lativittatus	DD	32.5039	43.4093	9.47804	NO	1	0	0	Unknown
135600	Ray-finned fish	Cyprinodontidae	Aphanius almiriensis	CR	8.75777	10.5442	9.46747	YES	0	0	1	Decreasing
104699508	Lepidosaurs	Gekkonidae	Cyrtodactylus takouensis	CR	10.2681	10.521	9.46529	YES	0	0	0	Unknown
22704507	Birds	Dasyornithidae	Dasyornis brachypterus	EN	13.5834	19.9244	9.45058	YES	0	0	0	Decreasing
190943	Amphibians	Microhylidae	Anodonthyla theoi	CR	7.36865	10.385	9.44871	YES	0	0	0	Decreasing
161577	Chondrichthyes	Arhynchobatidae	Arhynchobatis asperrimus	DD	41.4411	41.5575	9.4471	NO	0	0	0	Unknown
186166	Amphibians	Rhacophoridae	Raorchestes sushili	CR	6.60208	10.3023	9.44266	YES	0	0	0	Unknown
59427	Amphibians	Plethodontidae	Thorius smithi	CR	5.84399	10.5049	9.43421	YES	0	0	0	Decreasing
186163	Amphibians	Rhacophoridae	Raorchestes kaikatti	CR	6.53123	10.3102	9.42589	YES	0	0	0	Decreasing
42760305	Lepidosaurs	Chamaeleonidae	Rhampholeon viridis	EN	16.5842	20.2516	9.405	YES	0	0	0	Decreasing
57534	Amphibians	Mantellidae	Gephyromantis zavona	EN	18.9182	19.3811	9.40226	YES	0	0	0	Decreasing
7142	Amphibians	Eleutherodactylidae	Eleutherodactylus jasperi	CR	6.35752	10.3427	9.3927	YES	0	1	0	Unknown
56537	Amphibians	Craugastoridae	Craugastor cruzi	CR	6.54466	10.3283	9.39022	YES	0	1	0	Decreasing
11200	Chondrichthyes	Lamnidae	Lamna nasus	VU	39.5309	40.5206	9.38482	YES	0	0	0	Decreasing
NA	Chondrichthyes	Odontaspididae	Carcharias tricuspidatus	NA	19.1478	38.0172	9.38145	NO	0	0	0	NA
55613	Amphibians	Hylidae	Sarcohyla psarosema	CR	4.97558	10.2549	9.38142	YES	0	1	0	Decreasing
55675	Amphibians	Hylidae	Isthmohyla tica	CR	4.24812	10.1496	9.37763	YES	0	0	0	Decreasing
180566	Ray-finned fish	Aplocheilidae	Aplocheilus dayi	EN	17.1759	19.4708	9.36526	YES	0	0	0	Decreasing
14261	Mammals	Mystacinidae	Mystacina tuberculata	VU	3.44862	40.4519	9.36378	YES	0	0	0	Decreasing
55260	Amphibians	Aromobatidae	Aromobates serranus	CR	5.53788	10.3081	9.36098	YES	0	1	0	Decreasing
NA	Amphibians	Chikilidae	Chikila alcocki	NA	31.8986	46.6386	9.35854	NO	0	0	0	NA
39388	Chondrichthyes	Sphyrnidae	Sphyrna zygaena	VU	41.6164	41.7719	9.35038	YES	0	0	0	Decreasing
54559	Amphibians	Bufonidae	Atelopus tricolor	CR	4.25861	10.3786	9.34293	YES	0	0	0	Decreasing
8821	Ray-finned fish	Galaxiidae	Galaxiella munda	EN	15.6656	19.8633	9.33371	YES	0	0	0	Decreasing
57338	Amphibians	Telmatobiidae	Telmatobius fronteriensis	CR	5.60721	10.2183	9.32219	YES	0	0	0	Decreasing
55259	Amphibians	Aromobatidae	Aromobates orostoma	CR	5.83452	10.2928	9.3209	YES	0	0	0	Decreasing
49830703	Ray-finned fish	Rivulidae	Anablepsoides speciosus	CR	9.54754	10.2499	9.31011	YES	0	0	0	Unknown
136160	Amphibians	Mantellidae	Gephyromantis azzurrae	EN	14.6777	19.281	9.29798	YES	0	0	0	Decreasing
75306501	Lepidosaurs	Leiocephalidae	Leiocephalus endomychus	CR	8.27583	10.2053	9.29401	YES	0	1	0	Decreasing
62256	Testudines	Trionychidae	Trionyx triunguis	VU	38.7017	38.7646	9.29391	YES	0	0	0	Decreasing
56598	Amphibians	Craugastoridae	Craugastor fecundus	CR	6.07969	10.0759	9.29155	YES	0	1	0	Decreasing
74856459	Lepidosaurs	Amphisbaenidae	Amphisbaena leali	CR	8.08421	10.3823	9.28664	YES	0	0	0	Unknown
8707	Ray-finned fish	Fundulidae	Fundulus julisia	EN	19.8925	20.0114	9.28112	YES	0	0	0	Unknown
180662	Ray-finned fish	Cyprinidae	Catlocarpio siamensis	CR	6.30278	10.6381	9.27859	YES	0	0	0	Decreasing
78459186	Amphibians	Plethodontidae	Cryptotriton necopinus	CR	5.46767	10.1841	9.27416	YES	0	0	0	Decreasing
59564	Amphibians	Herpelidae	Herpele multiplicata	DD	39.7625	42.9228	9.25767	NO	1	0	0	Unknown
135744	Amphibians	Telmatobiidae	Telmatobius chusmisensis	EN	11.0054	18.909	9.25588	YES	0	0	0	Decreasing
57473	Amphibians	Mantellidae	Gephyromantis corvus	EN	14.8737	19.2791	9.25255	YES	0	0	0	Decreasing
55048	Amphibians	Dendrobatidae	Ectopoglossus atopoglossus	CR	6.69275	10.2194	9.24912	NO	0	1	0	Decreasing
10588	Mammals	Erinaceidae	Neohylomys hainanensis	EN	18.9302	18.977	9.24538	YES	0	0	0	Decreasing
54501	Amphibians	Bufonidae	Atelopus coynei	CR	3.23467	10.2681	9.23697	YES	0	0	1	Decreasing
75085311	Lepidosaurs	Dactyloidae	Anolis rimarum	CR	6.42355	10.1073	9.23201	YES	0	0	0	Decreasing
10269	Ray-finned fish	Acipenseridae	Huso huso	CR	9.47387	9.47485	9.22267	YES	0	0	1	Decreasing
75605892	Lepidosaurs	Sphaerodactylidae	Sphaerodactylus schwartzi	EN	16.3682	19.4425	9.22137	YES	0	0	0	Unknown
22697641	Birds	Cathartidae	Vultur gryphus	VU	38.5597	39.0089	9.21938	YES	0	0	0	Decreasing
107649398	Ray-finned fish	Cyprinidae	Pseudobarbus burchelli	CR	7.65214	10.223	9.21506	YES	0	0	0	Decreasing
60162	Chondrichthyes	Dasyatidae	Taeniurops meyeni	VU	36.6679	40.7718	9.20689	YES	0	0	0	Decreasing
NA	Ray-finned fish	Galaxiidae	Galaxias platei	NA	43.6624	43.6624	9.20279	NO	0	0	0	NA
167874	Ray-finned fish	Cyprinidae	Danionella dracula	NA	46.1499	46.1561	9.20153	NO	0	0	1	Unknown
22726971	Birds	Alcedinidae	Alcedo euryzona	CR	10.1113	10.1229	9.19554	YES	0	0	0	Decreasing
NA	Ray-finned fish	Sphyraenidae	Sphyraena forsteri	NA	50.1605	50.1605	9.18741	NO	0	0	0	NA
161437	Chondrichthyes	Pentanchidae	Pentanchus profundicolus	LC	45.4652	45.4652	9.18592	NO	0	0	0	Stable
135828	Amphibians	Eleutherodactylidae	Eleutherodactylus juanariveroi	CR	4.36524	10.0858	9.18293	YES	0	0	0	Decreasing
55099	Amphibians	Aromobatidae	Allobates juanii	EN	13.9287	19.0782	9.1796	YES	0	0	0	Decreasing
75317710	Lepidosaurs	Leiocephalidae	Leiocephalus rhutidira	CR	7.66627	10.1647	9.17884	YES	0	1	0	Unknown
14765	Testudines	Trionychidae	Nilssonia formosa	EN	19.0243	19.0243	9.17876	YES	0	0	0	Decreasing
155187257	Birds	Procellariidae	Pelecanoides whenuahouensis	CR	10.033	10.3032	9.17527	YES	0	0	0	Increasing
196453	Amphibians	Craugastoridae	Ceuthomantis smaragdinus	VU	31.3721	39.2031	9.17442	YES	0	0	0	Unknown
59372	Amphibians	Plethodontidae	Pseudoeurycea brunnata	CR	7.19019	9.97988	9.17057	YES	0	1	0	Decreasing
55908	Amphibians	Hylidae	Quilticohyla acrochorda	CR	6.30063	10.1848	9.16852	YES	0	0	0	Decreasing
57509	Amphibians	Mantellidae	Mantidactylus pauliani	CR	9.9744	10.1002	9.16484	YES	0	0	0	Decreasing
75605882	Lepidosaurs	Sphaerodactylidae	Sphaerodactylus samanensis	CR	7.72366	10.0132	9.15846	YES	0	0	0	Decreasing
NA	Chondrichthyes	Dasyatidae	Taeniura grabata	NA	36.8569	40.6483	9.15055	NO	0	0	0	NA
48103132	Amphibians	Rhacophoridae	Rhacophorus calcaneus	EN	19.3381	19.7065	9.14305	YES	0	0	0	Decreasing
158466	Amphibians	Bufonidae	Atelopus eusebiodiazi	CR	3.75895	10.2412	9.11386	YES	0	1	0	Decreasing
55875	Amphibians	Hylidae	Plectrohyla glandulosa	CR	5.49513	10.1066	9.10739	YES	0	0	0	Decreasing
7148	Amphibians	Eleutherodactylidae	Eleutherodactylus sisyphodemus	CR	7.98348	10.0678	9.10446	YES	0	0	0	Decreasing
192091	Lepidosaurs	Xenophidiidae	Xenophidion schaeferi	DD	28.2054	45.3495	9.08579	NO	0	0	0	Unknown
54547	Amphibians	Bufonidae	Atelopus sanjosei	CR	4.01911	10.0724	9.08563	YES	0	0	0	Decreasing
178566	Lepidosaurs	Gekkonidae	Cnemaspis anaikattiensis	CR	7.26407	9.98513	9.08229	YES	0	0	0	Unknown
60218	Chondrichthyes	Carcharhinidae	Isogomphodon oxyrhynchus	CR	7.41061	10.0991	9.07191	NO	0	0	0	Decreasing
91211508	Ray-finned fish	Siluridae	Kryptopterus mononema	CR	8.67865	10.5393	9.06852	YES	0	1	0	Unknown
135992	Amphibians	Microhylidae	Cophixalus misimae	CR	7.06334	9.86632	9.06458	YES	0	0	0	Decreasing
170206	Ray-finned fish	Sparidae	Polysteganus undulosus	CR	9.3165	9.54422	9.04335	YES	0	0	1	Increasing
13555	Ray-finned fish	Eleotridae	Milyeringa veritas	EN	3.15372	19.2309	9.04256	YES	0	0	0	Decreasing
47755615	Lepidosaurs	Gekkonidae	Alsophylax tadjikiensis	CR	6.80371	9.94001	9.03893	YES	0	0	0	Unknown
NA	Ray-finned fish	Trichodontidae	Trichodon trichodon	NA	31.5841	34.9525	9.03614	NO	0	0	0	NA
89930126	Lepidosaurs	Anguidae	Anniella grinnelli	EN	14.5132	18.1653	9.03588	YES	0	0	0	NA
41118	Amphibians	Microhylidae	Cophixalus concinnus	CR	7.54292	10.1422	9.03066	YES	0	0	1	Stable
7147	Amphibians	Eleutherodactylidae	Eleutherodactylus semipalmatus	CR	4.32094	9.78746	9.01497	YES	0	1	1	Decreasing
48101708	Amphibians	Megophryidae	Leptobrachella melica	EN	16.9414	18.9009	9.01373	YES	0	0	0	Decreasing
75605372	Lepidosaurs	Sphaerodactylidae	Sphaerodactylus cochranae	CR	7.45246	10.0574	9.00391	YES	0	0	0	Unknown
60469196	Ray-finned fish	Cirrhitidae	Amblycirrhitus earnshawi	EN	18.2401	19.1418	9.00264	YES	0	0	0	Unknown
164598	Lepidosaurs	Gekkonidae	Alsophylax laevis	CR	6.8394	9.98007	8.98997	YES	0	0	1	Decreasing
54528	Amphibians	Bufonidae	Atelopus monohernandezii	CR	3.31729	9.95277	8.98742	YES	0	1	0	Decreasing
57009	Amphibians	Eleutherodactylidae	Eleutherodactylus toa	EN	18.8474	19.2483	8.98212	YES	0	0	1	Decreasing
54550	Amphibians	Bufonidae	Atelopus sernai	CR	3.50538	9.82889	8.97802	YES	0	1	0	Decreasing
2773	Ray-finned fish	Osphronemidae	Betta chloropharynx	CR	10.5409	10.5411	8.97622	YES	0	0	0	Unknown
22704502	Birds	Dasyornithidae	Dasyornis longirostris	EN	13.2861	18.8758	8.97476	YES	0	0	0	Decreasing
172773	Lepidosaurs	Chamaeleonidae	Palleon nasus	VU	36.0323	38.2044	8.97386	YES	0	0	0	Decreasing
75606669	Lepidosaurs	Tropidophiidae	Tropidophis stullae	CR	7.14498	9.94888	8.97193	YES	0	0	0	Decreasing
135712	Ray-finned fish	Cobitidae	Cobitis illyrica	CR	10.6754	10.8876	8.95749	YES	0	0	1	Unknown
56449	Amphibians	Eleutherodactylidae	Eleutherodactylus bakeri	CR	8.9715	9.79667	8.95334	YES	0	0	1	Decreasing
57962	Amphibians	Microhylidae	Cophyla tetra	EN	17.2119	18.5845	8.95304	YES	0	0	0	Decreasing
4965	Testudines	Emydidae	Glyptemys insculpta	EN	8.58128	18.2835	8.94985	YES	0	0	1	Decreasing
NA	Ray-finned fish	Glaucosomatidae	Glaucosoma magnificum	NA	34.5313	34.9763	8.94754	NO	0	0	0	NA
9013	Testudines	Testudinidae	Geochelone platynota	CR	5.80718	9.82244	8.9429	YES	0	0	0	Increasing
75606581	Lepidosaurs	Tropidophiidae	Tropidophis parkeri	CR	6.59702	9.73049	8.94176	YES	0	0	0	Unknown
169553	Ray-finned fish	Osphronemidae	Sphaerichthys vaillanti	EN	14.8353	18.266	8.9403	YES	0	0	0	Decreasing
75310301	Lepidosaurs	Leiocephalidae	Leiocephalus onaneyi	CR	7.79951	9.68295	8.9368	YES	0	0	0	Unknown
59040	Amphibians	Rhinophrynidae	Rhinophrynus dorsalis	LC	162.692	162.692	8.93612	NO	0	0	0	Stable
55658	Amphibians	Hylidae	Sarcohyla siopela	CR	5.02468	9.92445	8.92586	YES	0	1	0	Decreasing
59174	Amphibians	Plethodontidae	Bolitoglossa longissima	CR	8.98034	9.93576	8.92528	YES	0	0	0	Decreasing
74995767	Lepidosaurs	Dactyloidae	Anolis longitibialis	EN	18.0967	18.8451	8.92478	YES	0	0	0	Unknown
5957	Testudines	Geoemydidae	Cuora yunnanensis	CR	7.88782	9.80558	8.91779	YES	0	0	1	Decreasing
135730	Amphibians	Microhylidae	Cophixalus timidus	CR	7.63257	9.69935	8.91449	NO	0	0	0	Unknown
55000	Amphibians	Centrolenidae	Celsiella vozmedianoi	EN	14.7053	17.9514	8.91228	YES	0	0	0	Decreasing
77342836	Amphibians	Aromobatidae	Aromobates zippeli	CR	5.39394	10.0121	8.91178	YES	0	0	0	Decreasing
56641	Amphibians	Craugastoridae	Craugastor gulosus	CR	6.12356	9.87741	8.90892	YES	0	0	0	Unknown
2772	Ray-finned fish	Osphronemidae	Betta burdigala	CR	9.41823	10.1357	8.90149	YES	0	0	0	Unknown
8371	Amphibians	Salamandridae	Euproctus platycephalus	EN	16.8178	18.3986	8.89683	YES	0	0	1	Decreasing
54557	Amphibians	Bufonidae	Atelopus subornatus	CR	4.17087	9.93273	8.89467	YES	0	1	0	Decreasing
59413	Amphibians	Plethodontidae	Thorius insperatus	CR	8.36873	9.87427	8.89076	YES	0	0	0	Decreasing
7146	Amphibians	Eleutherodactylidae	Eleutherodactylus karlschmidti	CR	5.16911	9.93305	8.88238	YES	0	1	0	Unknown
55143	Amphibians	Dendrobatidae	Hyloxalus ruizi	CR	6.45696	9.64656	8.88167	YES	0	1	0	Decreasing
44581	Chondrichthyes	Triakidae	Mustelus fasciatus	CR	6.54279	9.53083	8.87949	NO	0	0	0	Decreasing
98152257	Lepidosaurs	Eublepharidae	Goniurosaurus kuroiwae	VU	23.4925	39.0371	8.87792	YES	0	0	0	Decreasing
59417	Amphibians	Plethodontidae	Thorius minutissimus	CR	6.70513	9.79126	8.8772	YES	0	0	0	Decreasing
55255	Amphibians	Aromobatidae	Aromobates haydeeae	CR	5.61328	9.84204	8.86711	YES	0	1	0	Decreasing
58125	Amphibians	Phrynobatrachidae	Phrynobatrachus manengoubensis	CR	9.37444	9.78942	8.86422	YES	0	1	0	Decreasing
75606416	Lepidosaurs	Tropidophiidae	Tropidophis caymanensis	CR	7.27951	9.81277	8.86351	YES	0	0	0	Unknown
55330	Amphibians	Hemiphractidae	Gastrotheca dendronastes	EN	14.0541	18.4526	8.85833	YES	0	0	0	Decreasing
55471	Amphibians	Hylidae	Ecnomiohyla echinata	CR	4.87495	9.82553	8.85828	NO	1	1	0	Unknown
3326	Mammals	Leporidae	Bunolagus monticularis	CR	8.71768	9.92449	8.85808	YES	0	0	0	Decreasing
4529	Ray-finned fish	Goodeidae	Characodon audax	EN	2.13305	19.3177	8.8543	YES	0	0	0	Decreasing
182184	Ray-finned fish	Nothobranchiidae	Aphyosemion amoenum	EN	15.6912	18.9376	8.85027	YES	0	0	1	Unknown
55442	Amphibians	Hylidae	Sarcohyla charadricola	CR	4.58609	9.91644	8.84766	YES	1	1	0	Decreasing
9772	Amphibians	Heleophrynidae	Heleophryne hewitti	EN	14.4441	18.99	8.84088	NO	0	0	0	Unknown
91307122	Ray-finned fish	Osphronemidae	Betta albimarginata	EN	13.2567	20.4185	8.83681	YES	0	0	0	Decreasing
55873	Amphibians	Hylidae	Plectrohyla dasypus	CR	4.1715	9.7399	8.8362	YES	0	0	0	Decreasing
178382	Lepidosaurs	Carphodactylidae	Orraya occultus	VU	37.445	37.445	8.8362	YES	0	0	0	Unknown
57958	Amphibians	Microhylidae	Cophyla mavomavo	EN	17.5253	18.8935	8.83388	YES	0	0	0	Decreasing
NA	Lepidosaurs	Scincidae	Otosaurus cumingi	NA	37.6391	37.6391	8.83367	NO	0	0	0	NA
55603	Amphibians	Hylidae	Isthmohyla pictipes	CR	4.73015	10.0244	8.83266	YES	0	0	0	Decreasing
5336	Lepidosaurs	Cordylidae	Smaug giganteus	VU	37.7789	37.7789	8.83097	YES	0	0	0	Decreasing
8766	Lepidosaurs	Chamaeleonidae	Furcifer minor	EN	18.0072	18.033	8.82589	YES	0	0	1	Decreasing
53876177	Ray-finned fish	Rivulidae	Cynodonichthys uroflammeus	EN	10.4945	19.0329	8.81475	YES	0	0	0	Unknown
54429	Amphibians	Arthroleptidae	Leptodactylodon blanci	EN	11.5785	18.4224	8.8077	YES	0	0	0	Unknown
59234	Amphibians	Plethodontidae	Cryptotriton alvarezdeltoroi	EN	13.9165	18.3042	8.80398	YES	0	0	0	Decreasing
180665	Ray-finned fish	Cyprinidae	Balantiocheilos ambusticauda	CR	4.64207	10.0091	8.80153	YES	0	1	0	Decreasing
54507	Amphibians	Bufonidae	Atelopus eusebianus	CR	4.34361	9.88073	8.79866	YES	0	1	0	Decreasing
56799	Amphibians	Craugastoridae	Craugastor obesus	CR	5.89867	9.7324	8.7951	YES	0	0	0	Unknown
55074	Amphibians	Dendrobatidae	Hyloxalus edwardsi	CR	6.72931	9.63162	8.79135	YES	0	1	0	Decreasing
54354	Amphibians	Limnodynastidae	Philoria loveridgei	EN	8.78282	17.9063	8.78539	YES	0	0	1	Decreasing
56563	Amphibians	Craugastoridae	Pristimantis diogenes	CR	8.16072	9.6875	8.78406	NO	0	0	0	Decreasing
151283927	Amphibians	Eleutherodactylidae	Eleutherodactylus manantlanensis	CR	6.1235	9.78762	8.78398	YES	0	0	0	Unknown
182821	Ray-finned fish	Nothobranchiidae	Scriptaphyosemion etzeli	CR	8.83419	9.09172	8.77915	YES	0	0	0	Unknown
54434	Amphibians	Arthroleptidae	Leptodactylodon ornatus	EN	11.2322	17.7753	8.77676	YES	0	0	0	Decreasing
58380	Amphibians	Micrixalidae	Micrixalus kottigeharensis	CR	7.85159	9.63056	8.77197	NO	0	0	1	Decreasing
13610	Ray-finned fish	Eleotridae	Mogurnda furva	CR	8.66306	9.53143	8.76854	YES	0	0	0	Decreasing
2649	Amphibians	Plethodontidae	Batrachoseps campi	EN	8.53238	18.0161	8.74854	YES	0	0	1	Decreasing
193429	Amphibians	Brevicipitidae	Callulina stanleyi	CR	8.35413	9.56866	8.747	YES	0	0	0	Unknown
55807	Amphibians	Hylidae	Osteopilus crucialis	EN	18.2469	18.7055	8.74338	YES	0	0	0	Decreasing
57382	Amphibians	Limnodynastidae	Philoria richmondensis	EN	8.42945	18.0145	8.73678	YES	0	0	1	Decreasing
57381	Amphibians	Limnodynastidae	Philoria pughi	EN	8.98556	17.902	8.72952	YES	0	0	1	Decreasing
NA	Ray-finned fish	Adrianichthyidae	Adrianichthys oophorus	NA	12.1052	38.4751	8.7256	NO	0	0	0	NA
57361	Amphibians	Telmatobiidae	Telmatobius sibiricus	CR	7.39174	9.54416	8.71968	YES	0	1	0	Decreasing
125853495	Ray-finned fish	Adrianichthyidae	Oryzias soerotoi	CR	7.46225	9.48082	8.71348	YES	0	0	0	Unknown
NA	Amphibians	Chikilidae	Chikila darlong	NA	32.967	46.459	8.70926	NO	0	0	0	NA
21972	Mammals	Muridae	Tokudaia muenninki	CR	6.65721	9.48331	8.70459	YES	0	0	0	Decreasing
58013	Amphibians	Microhylidae	Stumpffia roseifemoralis	EN	16.8533	18.5503	8.70407	YES	0	0	0	Decreasing
17519	Amphibians	Ceratobatrachidae	Platymantis insulatus	CR	7.56802	9.57942	8.70085	YES	0	0	0	Decreasing
53875841	Ray-finned fish	Rivulidae	Cynodonichthys glaucus	EN	17.6952	18.4543	8.70044	YES	0	0	0	Unknown
76317577	Amphibians	Microhylidae	Paedophryne kathismaphlox	CR	6.69211	9.79811	8.70042	YES	0	0	0	Decreasing
135154	Ray-finned fish	Cyprinidae	Xenocypris yunnanensis	CR	5.95495	9.54283	8.69798	YES	0	0	1	Unknown
55390	Amphibians	Hylidae	Isthmohyla angustilineata	CR	4.53679	9.44984	8.68601	NO	0	0	0	Decreasing
172750	Lepidosaurs	Scincidae	Paracontias minimus	CR	8.16138	9.553	8.68268	YES	0	0	0	Decreasing
56976	Amphibians	Craugastoridae	Craugastor stadelmani	CR	6.35276	9.44513	8.68075	YES	0	0	0	Decreasing
54553	Amphibians	Bufonidae	Atelopus sonsonensis	CR	4.01978	9.64109	8.6791	YES	0	1	0	Unknown
61889	Amphibians	Rhacophoridae	Pseudophilautus stuarti	CR	7.72933	9.37607	8.6703	YES	0	0	0	Decreasing
203133	Lepidosaurs	Dactyloidae	Anolis yoroensis	EN	18.1847	19.6054	8.66411	YES	0	0	0	Decreasing
178439	Lepidosaurs	Sphaerodactylidae	Gonatodes seigliei	EN	18.7018	18.8816	8.66339	YES	0	0	0	Decreasing
NA	Ray-finned fish	Trichodontidae	Arctoscopus japonicus	NA	31.5841	35.0471	8.66136	NO	0	0	0	NA
136097	Amphibians	Aromobatidae	Allobates caribe	CR	7.01954	9.77849	8.65911	YES	0	0	0	Decreasing
54462	Amphibians	Bufonidae	Rhaebo colomai	EN	3.98926	17.8287	8.65766	YES	0	0	0	Decreasing
3083	Lepidosaurs	Chamaeleonidae	Brookesia perarmata	EN	17.9057	17.9514	8.64792	YES	0	0	0	Decreasing
42687277	Lepidosaurs	Chamaeleonidae	Brookesia tristis	EN	11.2128	17.9713	8.64588	YES	0	0	0	Decreasing
61524	Lepidosaurs	Lacertidae	Phoenicolacerta kulzeri	EN	17.9062	17.91	8.64452	YES	0	0	1	Decreasing
4695	Testudines	Trionychidae	Chitra chitra	CR	5.85338	9.51687	8.64322	YES	0	0	0	Decreasing
55431	Amphibians	Hylidae	Sarcohyla calvicollina	CR	4.37625	9.59471	8.63241	YES	0	1	0	Decreasing
840	Lepidosaurs	Lacertidae	Algyroides marchi	EN	17.1336	17.5223	8.63193	YES	0	0	1	Decreasing
61900	Amphibians	Plethodontidae	Bolitoglossa oresbia	CR	8.07552	9.45743	8.62501	YES	0	0	0	Decreasing
59381	Amphibians	Plethodontidae	Pseudoeurycea goebeli	CR	3.8992	9.60515	8.62459	YES	0	0	0	Decreasing
55639	Amphibians	Hylidae	Sarcohyla sabrina	CR	4.32264	9.3697	8.62407	YES	0	1	0	Decreasing
176134	Lepidosaurs	Scincidae	Geoscincus haraldmeieri	CR	8.70369	9.57611	8.6115	YES	0	0	0	Unknown
21532	Amphibians	Myobatrachidae	Taudactylus liemi	NT	13.6357	68.3056	8.60862	NO	0	0	1	Stable
59143	Amphibians	Plethodontidae	Bolitoglossa carri	CR	7.9585	9.38362	8.60837	YES	0	0	0	Decreasing
57234	Amphibians	Craugastoridae	Noblella lynchi	EN	14.3311	17.6821	8.60588	NO	0	0	0	Decreasing
55329	Amphibians	Hemiphractidae	Gastrotheca cornuta	EN	13.8274	18.3376	8.60559	YES	0	0	1	Decreasing
41828	Chondrichthyes	Hypnidae	Hypnos monopterygius	LC	150.793	150.793	8.59776	NO	0	0	0	Unknown
57001	Amphibians	Eleutherodactylidae	Eleutherodactylus tetajulia	CR	5.15186	9.55711	8.59622	YES	0	0	1	Decreasing
22678901	Birds	Phasianidae	Xenoperdix udzungwensis	EN	17.7945	17.8664	8.58541	YES	0	0	0	Stable
161520	Chondrichthyes	Dasyatidae	Fontitrygon margaritella	DD	16.5609	40.161	8.58487	NO	0	0	0	Decreasing
19168	Amphibians	Ranidae	Babina holsti	EN	5.96917	18.4132	8.57944	YES	0	0	0	Decreasing
109480101	Lepidosaurs	Scincidae	Lissolepis coventryi	EN	19.0169	19.173	8.57879	YES	0	0	0	Decreasing
54355	Amphibians	Limnodynastidae	Philoria sphagnicolus	EN	9.33536	17.7464	8.57099	YES	0	0	1	Decreasing
91309930	Ray-finned fish	Osphronemidae	Betta hendra	CR	8.02195	9.42092	8.56759	YES	0	0	0	Unknown
8816	Ray-finned fish	Galaxiidae	Galaxias zebratus	NA	37.37	38.0391	8.54863	NO	0	0	1	Unknown
NA	Ray-finned fish	Mugilidae	Gracilimugil argenteus	NA	38.7306	38.945	8.54314	NO	0	0	0	NA
59000	Amphibians	Rhacophoridae	Rhacophorus lateralis	EN	17.4785	18.5565	8.54226	NO	0	0	1	Decreasing
121097935	Mammals	Hominidae	Pongo abelii	CR	1.97387	9.39185	8.53918	YES	0	0	0	Decreasing
54502	Amphibians	Bufonidae	Atelopus cruciger	CR	4.14093	9.49325	8.53682	NO	0	0	0	Stable
55041	Amphibians	Dendrobatidae	Hyloxalus abditaurantius	CR	6.25444	9.39176	8.53499	YES	0	1	0	Decreasing
17975	Mammals	Hominidae	Pongo pygmaeus	CR	1.97387	9.37186	8.52941	YES	0	0	0	Decreasing
NA	Ray-finned fish	Latidae	Psammoperca waigiensis	NA	50.5416	50.5416	8.51697	NO	0	0	0	NA
NA	Ray-finned fish	Catostomidae	Myxocyprinus asiaticus	NA	48.88	48.88	8.51556	NO	0	0	0	NA
56946	Amphibians	Craugastoridae	Craugastor sandersoni	EN	11.5476	18.7212	8.51017	YES	0	0	0	Decreasing
19172	Amphibians	Ranidae	Babina subaspera	EN	5.86521	18.2846	8.50932	YES	0	0	0	Stable
59032	Amphibians	Rhacophoridae	Theloderma bicolor	EN	17.4057	17.821	8.50458	YES	0	0	1	Unknown
55918	Amphibians	Hylidae	Atlantihyla spinipollex	EN	12.4871	17.9531	8.50087	YES	0	0	0	Decreasing
196575	Lepidosaurs	Gekkonidae	Lepidodactylus euaensis	CR	7.79777	9.59276	8.49791	YES	0	0	0	Stable
54541	Amphibians	Bufonidae	Atelopus pictiventris	CR	3.25448	9.57683	8.49164	YES	0	1	0	Decreasing
6623	Ray-finned fish	Cyprinidae	Dionda diaboli	EN	17.2689	17.2692	8.49161	YES	0	0	0	Decreasing
58011	Amphibians	Microhylidae	Stumpffia psologlossa	EN	16.7083	17.8978	8.47804	YES	0	0	0	Decreasing
55071	Amphibians	Dendrobatidae	Hyloxalus delatorreae	CR	7.17516	9.28895	8.47094	YES	0	0	0	Decreasing
39616	Testudines	Geoemydidae	Siebenrockiella crassicollis	VU	20.8561	36.1701	8.46907	YES	0	0	0	Decreasing
21623	Amphibians	Calyptocephalellidae	Telmatobufo bullocki	EN	16.3352	17.5935	8.4686	YES	0	0	0	Decreasing
91308798	Ray-finned fish	Osphronemidae	Betta antoni	EN	14.2514	17.7783	8.46447	YES	0	0	0	Unknown
5958	Testudines	Geoemydidae	Cuora amboinensis	EN	17.4257	17.7045	8.43338	YES	0	0	0	Decreasing
54353	Amphibians	Limnodynastidae	Philoria kundagungan	EN	8.81155	17.6975	8.43022	YES	0	0	1	Decreasing
61446	Lepidosaurs	Sphaerodactylidae	Euleptes europaea	NT	64.8285	66.4594	8.41489	NO	0	0	1	Unknown
17080	Testudines	Chelidae	Mesoclemmys dahli	CR	5.20841	9.29716	8.40932	YES	0	0	1	NA
NA	Ray-finned fish	Chironemidae	Chironemus maculosus	NA	33.4695	33.4755	8.399	NO	0	0	0	NA
41835	Chondrichthyes	Ginglymostomatidae	Nebrius ferrugineus	VU	32.3123	36.0073	8.39747	YES	0	0	0	Decreasing
22706449	Birds	Oriolidae	Oriolus mellianus	EN	17.894	17.9439	8.39207	YES	0	0	0	Decreasing
89183310	Amphibians	Craugastoridae	Noblella madreselva	CR	7.09116	9.28535	8.39189	NO	0	0	0	Decreasing
54534	Amphibians	Bufonidae	Atelopus nicefori	CR	3.11525	8.94797	8.39013	YES	0	1	0	Decreasing
55302	Amphibians	Hylidae	Argenteohyla siemersi	EN	17.462	17.563	8.3892	YES	0	0	1	Decreasing
44579408	Lepidosaurs	Sphaerodactylidae	Lepidoblepharis miyatai	CR	7.15996	9.32276	8.38328	YES	0	1	0	Unknown
61518	Lepidosaurs	Lacertidae	Atlantolacerta andreanskyi	NT	67.2861	67.2861	8.38319	NO	0	0	1	Stable
182964	Ray-finned fish	Cyprinodontidae	Aphanius saourensis	CR	6.33541	9.04721	8.38281	YES	0	0	1	Unknown
135845	Amphibians	Hyperoliidae	Hyperolius watsonae	CR	7.93044	8.96551	8.37781	YES	0	0	0	Decreasing
54497	Amphibians	Bufonidae	Atelopus certus	CR	3.06925	9.20924	8.37298	NO	0	0	0	Decreasing
136066	Amphibians	Craugastoridae	Ceuthomantis aracamuni	VU	30.8226	37.2498	8.36515	YES	0	0	0	Unknown
178429	Lepidosaurs	Tropidophiidae	Tropidophis hendersoni	CR	6.16047	9.29039	8.35729	YES	0	0	0	Unknown
56409	Amphibians	Eleutherodactylidae	Eleutherodactylus amadeus	CR	8.38468	9.23593	8.35543	YES	0	0	1	Decreasing
19483002	Ray-finned fish	Cyprinodontidae	Aphanius danfordii	CR	9.92007	9.92018	8.35028	YES	0	0	0	Decreasing
59240	Amphibians	Plethodontidae	Dendrotriton rabbi	CR	2.04351	9.20342	8.34697	YES	0	0	0	Decreasing
59461	Amphibians	Salamandridae	Laotriton laoensis	EN	17.0403	17.0403	8.33989	YES	0	0	0	Decreasing
197276	Ray-finned fish	Anguillidae	Anguilla dieffenbachii	EN	17.3368	17.3368	8.33989	YES	0	0	0	Unknown
75605559	Lepidosaurs	Sphaerodactylidae	Sphaerodactylus nycteropus	CR	6.49314	8.91841	8.33807	YES	1	0	0	Unknown
55456	Amphibians	Hylidae	Sarcohyla crassa	CR	3.99369	9.10024	8.3364	YES	0	0	0	Decreasing
54539	Amphibians	Bufonidae	Atelopus peruensis	CR	3.95303	9.1404	8.32416	YES	0	1	0	Decreasing
56603	Amphibians	Craugastoridae	Craugastor fleischmanni	CR	8.29615	9.39904	8.32105	YES	0	0	0	Decreasing
54510	Amphibians	Bufonidae	Atelopus farci	CR	3.52039	9.0195	8.3141	YES	0	1	0	Decreasing
54433	Amphibians	Arthroleptidae	Leptodactylodon mertensi	EN	10.8746	17.4927	8.31352	YES	0	0	0	Unknown
61911	Amphibians	Plethodontidae	Aquiloeurycea quetzalanensis	CR	7.12604	9.36513	8.31096	YES	0	0	0	Decreasing
178554	Lepidosaurs	Gekkonidae	Gekko badenii	EN	13.7653	17.5079	8.30126	YES	0	0	0	Decreasing
184439	Ray-finned fish	Cobitidae	Cobitis jadovaensis	CR	8.11306	9.83182	8.29853	YES	0	0	1	Unknown
55874	Amphibians	Hylidae	Plectrohyla exquisita	CR	3.87664	9.02937	8.29138	YES	0	0	0	Decreasing
55322	Amphibians	Hemiphractidae	Gastrotheca angustifrons	CR	6.72598	9.12727	8.28347	YES	0	1	0	Decreasing
136193	Mammals	Erinaceidae	Hylomys megalotis	DD	34.4621	34.4621	8.27873	NO	0	0	0	Unknown
49583995	Amphibians	Microhylidae	Stumpffia hara	CR	7.62033	9.27323	8.27301	YES	0	0	0	Decreasing
57803	Amphibians	Microhylidae	Dasypops schirchi	VU	34.7148	35.999	8.25733	YES	0	0	1	Decreasing
53875516	Ray-finned fish	Rivulidae	Cynodonichthys birkhahni	EN	19.4866	20.9618	8.25724	YES	0	0	0	Unknown
54426	Amphibians	Arthroleptidae	Leptodactylodon albiventris	EN	10.7405	17.3209	8.25658	YES	0	0	0	Decreasing
88219153	Amphibians	Mantellidae	Guibemantis diphonus	CR	7.99203	9.13753	8.25358	NO	0	0	0	Decreasing
121382794	Amphibians	Hylidae	Plectrohyla calvata	CR	4.23073	9.05416	8.25135	YES	0	0	0	Unknown
NA	Lepidosaurs	Pseudaspididae	Pseudaspis cana	NA	30.2498	35.3112	8.24855	NO	0	0	0	NA
55193	Amphibians	Dendrobatidae	Excidobates mysteriosus	EN	12.0065	16.7933	8.24604	YES	0	0	0	Decreasing
78521184	Amphibians	Craugastoridae	Noblella personina	EN	14.0747	17.6894	8.24482	NO	0	0	0	Decreasing
61374	Ray-finned fish	Cyprinidae	Pelasgus laconicus	CR	8.81927	8.82064	8.23493	YES	0	0	1	Decreasing
78901981	Amphibians	Bufonidae	Ansonia vidua	CR	7.64963	9.06833	8.23411	NO	0	0	0	Decreasing
78500583	Amphibians	Dendrobatidae	Excidobates condor	EN	12.0202	16.7823	8.22854	YES	0	0	0	Stable
NA	Ray-finned fish	Eleginopsidae	Eleginops maclovinus	NA	40.8109	40.8109	8.22469	NO	0	0	0	NA
63722	Lepidosaurs	Anguidae	Anniella geronimensis	EN	15.1038	17.3218	8.22163	YES	0	0	1	Decreasing
55313	Amphibians	Hylidae	Duellmanohyla soralia	EN	10.4155	17.4637	8.22006	YES	0	0	0	Decreasing
75605475	Lepidosaurs	Sphaerodactylidae	Sphaerodactylus lazelli	CR	6.45496	9.03462	8.21956	YES	1	1	0	Unknown
18435537	Amphibians	Bufonidae	Atelopus pastuso	CR	3.68126	8.89842	8.21041	YES	0	1	0	Unknown
169392	Ray-finned fish	Atherinopsidae	Atherinella jiloaensis	CR	7.54612	9.16624	8.20956	YES	0	0	1	Decreasing
172878	Lepidosaurs	Chamaeleonidae	Brookesia bonsi	CR	7.24948	9.12164	8.20912	YES	0	0	0	Decreasing
178322	Lepidosaurs	Sphaerodactylidae	Sphaerodactylus williamsi	CR	6.66987	9.06934	8.20881	YES	0	1	0	Decreasing
76317576	Amphibians	Phrynobatrachidae	Phrynobatrachus rainerguentheri	DD	40.651	41.8401	8.20821	NO	0	0	0	Unknown
22704154	Birds	Notiomystidae	Notiomystis cincta	VU	34.4349	34.4374	8.20672	YES	0	0	0	Stable
2119	Amphibians	Petropedetidae	Arthroleptides dutoiti	CR	7.67638	9.04428	8.20222	YES	1	1	0	Decreasing
54438	Amphibians	Arthroleptidae	Leptodactylodon stevarti	EN	11.2382	17.3759	8.19782	YES	0	0	0	Unknown
55883	Amphibians	Hylidae	Plectrohyla pycnochila	CR	4.01481	9.17603	8.18769	YES	1	1	0	Unknown
54554	Amphibians	Bufonidae	Atelopus sorianoi	CR	3.67173	8.82999	8.17418	YES	0	1	0	Decreasing
NA	Ray-finned fish	Eleotridae	Milyeringa brooksi	NA	3.15372	35.008	8.16636	NO	0	0	0	NA
182151	Ray-finned fish	Nothobranchiidae	Fundulopanchax scheeli	CR	5.75027	8.81714	8.16539	YES	0	0	0	Unknown
60178	Chondrichthyes	Trygonorrhinidae	Zapteryx xyster	VU	15.2395	34.3937	8.16296	NO	0	0	0	Decreasing
203128	Lepidosaurs	Dactyloidae	Anolis villai	CR	6.48762	8.88216	8.15928	YES	0	0	0	Decreasing
172803	Lepidosaurs	Gekkonidae	Phelsuma masohoala	CR	6.91209	9.08007	8.15215	YES	0	0	0	Unknown
176177	Lepidosaurs	Diplodactylidae	Dierogekko koniambo	CR	7.18469	9.04951	8.14836	YES	0	0	0	Decreasing
61437	Lepidosaurs	Scincidae	Janetaescincus braueri	EN	4.93783	17.7882	8.14834	YES	0	0	0	Decreasing
56962	Amphibians	Craugastoridae	Pristimantis signifer	CR	6.97894	8.89367	8.14496	YES	0	0	0	Decreasing
39258	Lepidosaurs	Diploglossidae	Celestus anelpistus	CR	6.28281	8.82597	8.14197	YES	0	1	0	Unknown
172599	Lepidosaurs	Scincidae	Eutropis clivicola	EN	15.89	17.6559	8.14036	YES	0	0	1	Unknown
59050	Amphibians	Ambystomatidae	Ambystoma amblycephalum	CR	6.8396	8.98778	8.12914	YES	0	0	0	Decreasing
76317613	Amphibians	Microhylidae	Oreophryne ezra	CR	6.39038	9.01422	8.12902	YES	0	0	0	Decreasing
58946	Amphibians	Rhacophoridae	Taruga eques	EN	7.43299	17.3535	8.12823	YES	0	0	0	Decreasing
164691443	Ray-finned fish	Poeciliidae	Phallichthys quadripunctatus	EN	13.4449	16.3851	8.11763	YES	0	0	0	Decreasing
58868	Amphibians	Rhacophoridae	Pseudophilautus macropus	CR	6.00747	9.06692	8.11744	YES	0	0	1	Decreasing
22735692	Birds	Rostratulidae	Rostratula australis	EN	15.6603	16.5451	8.11392	YES	0	0	0	Decreasing
193487	Lepidosaurs	Scincidae	Paracontias fasika	CR	4.97949	9.08017	8.11328	YES	0	0	0	Decreasing
61438	Lepidosaurs	Scincidae	Janetaescincus veseyfitzgeraldi	EN	4.93783	17.506	8.10046	YES	0	0	0	Decreasing
NA	Lepidosaurs	Dactyloidae	Anolis barbouri	NA	35.8004	35.8169	8.08959	NO	0	0	0	NA
22696628	Birds	Podicipedidae	Podiceps gallardoi	CR	8.14602	8.93955	8.08588	YES	0	0	0	Stable
190995	Amphibians	Aromobatidae	Mannophryne speeri	CR	5.2383	9.00943	8.07331	YES	0	0	0	Decreasing
NA	Ray-finned fish	Mugilidae	Squalomugil nasutus	NA	36.4567	36.4983	8.06247	NO	0	0	0	NA
NA	Lepidosaurs	Scincidae	Sphenomorphus indicus	NA	35.6561	35.8341	8.05845	NO	0	0	0	NA
NA	Chondrichthyes	Dasyatidae	Himantura pacifica	NA	19.6239	30.4316	8.0477	NO	0	0	0	NA
151182898	Lepidosaurs	Carphodactylidae	Phyllurus pinnaclensis	CR	6.82744	8.84017	8.04067	YES	0	0	0	Decreasing
18435526	Amphibians	Bufonidae	Atelopus gigas	CR	3.94222	9.01661	8.03948	YES	1	1	0	Unknown
29479	Lepidosaurs	Anguidae	Abronia frosti	CR	7.00531	8.85241	8.03593	YES	0	0	0	Decreasing
56815	Amphibians	Eleutherodactylidae	Eleutherodactylus orientalis	CR	7.74435	8.7311	8.02872	YES	0	0	1	Decreasing
55462	Amphibians	Hylidae	Isthmohyla debilis	CR	4.94007	8.96004	8.01317	YES	0	0	0	Decreasing
39331	Chondrichthyes	Squatinidae	Squatina occulta	CR	8.0096	8.92566	8.01052	NO	0	0	0	Decreasing
123768950	Testudines	Geoemydidae	Cuora trifasciata	CR	4.44948	8.9203	8.00884	YES	0	0	0	Decreasing
18582	Amphibians	Myobatrachidae	Pseudophryne corroboree	CR	7.33219	8.83759	8.00573	YES	0	0	1	Decreasing
86466968	Amphibians	Microhylidae	Rhombophryne tany	EN	11.3012	16.3276	7.99794	NO	0	0	0	Decreasing
178564	Lepidosaurs	Sphaerodactylidae	Sphaerodactylus callocricus	CR	6.51266	8.85373	7.99497	YES	0	0	0	Decreasing
58012	Amphibians	Microhylidae	Stumpffia pygmaea	EN	12.6649	16.7452	7.99333	YES	0	0	0	Decreasing
22684795	Birds	Cacatuidae	Cacatua haematuropygia	CR	8.93846	8.96318	7.99121	YES	0	0	0	Decreasing
55210	Amphibians	Dendrobatidae	Andinobates viridis	CR	6.91876	9.05112	7.98871	YES	0	1	0	Unknown
54545	Amphibians	Bufonidae	Atelopus quimbaya	CR	3.15285	8.89374	7.98037	YES	0	1	0	Unknown
39613	Testudines	Geoemydidae	Mauremys mutica	EN	10.039	16.2419	7.97046	YES	0	0	0	Decreasing
57004	Amphibians	Eleutherodactylidae	Eleutherodactylus thorectes	CR	7.52396	8.84729	7.96851	YES	0	0	1	Unknown
136045	Amphibians	Nyctibatrachidae	Nyctibatrachus minimus	DD	38.3001	38.5607	7.96773	NO	0	0	1	Unknown
55915	Amphibians	Hylidae	Atlantihyla panchoi	CR	4.61171	8.71474	7.95602	NO	0	0	0	Decreasing
58954	Amphibians	Rhacophoridae	Taruga longinasus	EN	3.56223	17.1099	7.955	YES	0	0	0	Decreasing
202436	Ray-finned fish	Elassomatidae	Elassoma alabamae	CR	8.70763	8.78489	7.95452	YES	0	0	0	Decreasing
54543	Amphibians	Bufonidae	Atelopus planispina	CR	2.54058	8.62875	7.95303	YES	0	1	0	Decreasing
10714	Mammals	Nesomyidae	Hypogeomys antimena	EN	16.8939	16.9812	7.94715	YES	0	0	0	Unknown
54431	Amphibians	Arthroleptidae	Leptodactylodon bueanus	EN	10.0412	16.835	7.94696	YES	0	0	0	Decreasing
56324	Amphibians	Batrachylidae	Atelognathus praebasalticus	EN	11.3487	16.3953	7.93292	YES	0	0	0	Decreasing
55812	Amphibians	Hylidae	Osteopilus wilderi	EN	14.7036	16.9155	7.93281	YES	0	0	0	Decreasing
81646342	Amphibians	Bufonidae	Atelopus ebenoides	CR	3.88145	8.70921	7.93037	YES	0	1	0	Decreasing
70680197	Chondrichthyes	Carcharhinidae	Carcharhinus dussumieri	EN	15.6811	16.7984	7.92156	YES	0	0	0	Decreasing
135890	Amphibians	Bufonidae	Atelopus pyrodactylus	CR	3.38444	8.63394	7.92119	YES	0	0	0	Decreasing
54773	Amphibians	Bufonidae	Incilius tacanensis	EN	16.8274	16.8402	7.91555	YES	0	0	0	Unknown
58015	Amphibians	Microhylidae	Stumpffia tridactyla	DD	36.0097	37.3184	7.90875	NO	0	0	0	Decreasing
39339	Chondrichthyes	Alopiidae	Alopias vulpinus	VU	33.7366	34.5153	7.90656	NO	0	0	0	Decreasing
136053	Amphibians	Craugastoridae	Microkayla ankohuma	CR	6.30676	8.83406	7.90069	NO	0	0	0	Unknown
55527	Amphibians	Hylidae	Sarcohyla labedactyla	CR	4.12947	8.80758	7.89793	YES	0	0	0	Decreasing
55809	Amphibians	Hylidae	Osteopilus marianae	EN	14.6752	16.9495	7.89677	YES	0	0	0	Decreasing
NA	Ray-finned fish	Paralichthyidae	Xystreurys rasile	NA	33.2979	33.8414	7.89159	NO	0	0	0	NA
49581681	Amphibians	Mantellidae	Spinomantis nussbaumi	CR	7.09985	8.77537	7.89118	YES	0	0	0	Decreasing
55887	Amphibians	Hylidae	Plectrohyla teuchestes	CR	3.78288	8.62701	7.88859	YES	0	0	0	Decreasing
75605940	Lepidosaurs	Sphaerodactylidae	Sphaerodactylus sommeri	CR	6.52974	8.73039	7.88518	YES	0	0	0	Decreasing
58746	Amphibians	Ranidae	Lithobates vibicarius	EN	15.6068	16.2762	7.88368	YES	0	0	0	Decreasing
178257	Lepidosaurs	Dactyloidae	Anolis loveridgei	EN	14.6548	17.2008	7.88238	YES	0	0	0	Decreasing
NA	Ray-finned fish	Hoplichthyidae	Hoplichthys prosemion	NA	34.8346	35.0312	7.8782	NO	0	0	0	NA
59407	Amphibians	Plethodontidae	Thorius arboreus	CR	7.37562	8.70236	7.8703	YES	0	0	0	Decreasing
119243838	Amphibians	Plethodontidae	Thorius longicaudus	CR	5.16326	8.72088	7.86746	YES	0	1	0	Unknown
21567292	Amphibians	Bufonidae	Atelopus nocturnus	CR	3.16564	8.93065	7.86222	YES	0	0	0	Unknown
161058712	Ray-finned fish	Eleotridae	Mogurnda aiwasoensis	CR	7.44461	8.66979	7.86205	YES	0	0	0	Unknown
63166	Chondrichthyes	Rhinobatidae	Rhinobatos penggali	VU	25.9767	34.281	7.85605	NO	0	0	0	Decreasing
57052	Amphibians	Eleutherodactylidae	Eleutherodactylus warreni	CR	5.34815	8.67612	7.85129	YES	0	0	1	Unknown
176325	Lepidosaurs	Xenodermidae	Achalinus jinggangensis	CR	7.36786	8.66989	7.85097	YES	0	0	0	Decreasing
54537	Amphibians	Bufonidae	Atelopus palmatus	CR	3.02081	8.69547	7.83485	YES	0	0	0	Decreasing
176187	Lepidosaurs	Diplodactylidae	Dierogekko kaalaensis	CR	4.8356	8.67223	7.83377	YES	0	0	0	Decreasing
2271	Ray-finned fish	Goodeidae	Ataeniobius toweri	EN	15.8081	15.8086	7.829	YES	0	0	0	Unknown
54524	Amphibians	Bufonidae	Atelopus lynchi	CR	3.09991	8.88284	7.82605	YES	0	1	0	Decreasing
NA	Lepidosaurs	Scincidae	Lipinia relicta	NA	33.4179	33.5462	7.82342	NO	0	0	0	NA
42706	Chondrichthyes	Scyliorhinidae	Cephaloscyllium albipinnum	CR	8.77031	9.08976	7.8234	NO	0	0	0	Decreasing
39412	Chondrichthyes	Dasyatidae	Taeniura lymma	LC	61.6669	61.7377	7.81978	NO	0	0	0	Increasing
55247	Amphibians	Aromobatidae	Mannophryne neblina	CR	5.73522	8.61538	7.81825	YES	1	0	0	Decreasing
55577	Amphibians	Hylidae	Charadrahyla nephila	EN	9.40899	16.4233	7.81565	YES	0	0	0	Unknown
60095	Chondrichthyes	Urolophidae	Urolophus javanicus	CR	7.37625	8.65086	7.81542	NO	0	1	0	Unknown
5963	Testudines	Geoemydidae	Cuora zhoui	CR	3.5339	8.73408	7.81461	YES	0	0	1	NA
49584796	Amphibians	Microhylidae	Stumpffia madagascariensis	EN	12.4493	16.713	7.81286	YES	0	0	0	Decreasing
89183465	Amphibians	Plethodontidae	Cryptotriton veraepacis	CR	6.05163	8.54861	7.80905	YES	0	0	0	Decreasing
55583	Amphibians	Hylidae	Sarcohyla pachyderma	CR	3.89048	8.62284	7.80814	YES	1	1	0	Decreasing
59441	Amphibians	Salamandridae	Cynops ensicauda	EN	16.177	16.5384	7.80591	YES	0	0	0	Decreasing
55363	Amphibians	Hemiphractidae	Gastrotheca walkeri	VU	33.1851	37.3108	7.79731	NO	0	0	0	Unknown
56659	Amphibians	Eleutherodactylidae	Eleutherodactylus hypostenor	EN	10.7397	16.5683	7.79669	YES	0	0	1	Decreasing
55323	Amphibians	Hemiphractidae	Gastrotheca antomia	CR	5.58124	8.66931	7.79493	YES	0	1	0	Decreasing
75605887	Lepidosaurs	Sphaerodactylidae	Sphaerodactylus schuberti	CR	6.14895	8.63548	7.79471	YES	0	0	0	Unknown
161674	Chondrichthyes	Hexatrygonidae	Hexatrygon bickelli	LC	136.023	136.023	7.77844	NO	0	0	0	Unknown
203101	Lepidosaurs	Dactyloidae	Anolis kreutzi	CR	6.07643	8.60069	7.77256	YES	0	0	0	Decreasing
55355	Amphibians	Hemiphractidae	Gastrotheca psychrophila	EN	14.4569	16.669	7.76612	YES	0	0	0	Decreasing
54542	Amphibians	Bufonidae	Atelopus pinangoi	CR	2.30371	8.46501	7.75903	YES	0	1	0	Decreasing
NA	Lepidosaurs	Sphaerodactylidae	Coleodactylus brachystoma	NA	34.217	35.03	7.75187	NO	0	0	0	NA
135999	Amphibians	Craugastoridae	Microkayla guillei	CR	5.8968	8.68751	7.74875	NO	0	0	0	Unknown
176150	Lepidosaurs	Diplodactylidae	Dierogekko thomaswhitei	CR	4.82527	8.67341	7.74698	YES	0	0	0	Decreasing
56468	Amphibians	Craugastoridae	Craugastor bocourti	EN	12.8874	16.4446	7.7456	YES	0	0	0	Decreasing
NA	Ray-finned fish	Odontobutidae	Odontobutis interrupta	NA	33.556	33.5562	7.74509	NO	0	0	0	NA
135839	Amphibians	Dicroglossidae	Nannophrys naeyakai	EN	7.86628	16.0487	7.74168	YES	0	0	0	Decreasing
161483	Chondrichthyes	Rajidae	Hongeo koreana	CR	36.9271	38.2512	7.73615	NO	0	0	0	Decreasing
56414	Amphibians	Craugastoridae	Craugastor andi	CR	4.88584	8.27624	7.73478	YES	0	1	0	Decreasing
161485	Chondrichthyes	Triakidae	Mustelus punctulatus	VU	28.4215	33.735	7.72541	NO	0	0	0	Decreasing
60161	Chondrichthyes	Dasyatidae	Himantura schmardae	EN	19.5829	30.333	7.72511	NO	0	0	0	Decreasing
60235	Chondrichthyes	Heterodontidae	Heterodontus mexicanus	LC	28.3565	31.9143	7.72384	NO	0	0	0	Stable
12399	Ray-finned fish	Bythitidae	Lucifuga simile	CR	7.74282	8.56096	7.71282	YES	0	0	0	Unknown
10253	Lepidosaurs	Diplodactylidae	Toropuku stephensi	EN	15.9894	15.9894	7.7109	YES	0	0	0	Unknown
56499	Amphibians	Craugastoridae	Ceuthomantis cavernibardus	DD	30.5314	34.789	7.70941	NO	0	0	1	Unknown
136150	Amphibians	Craugastoridae	Microkayla saltator	CR	6.1335	8.1789	7.70522	NO	0	0	0	Decreasing
10252	Lepidosaurs	Diplodactylidae	Tukutuku rakiurae	EN	15.8665	15.8668	7.70258	YES	0	0	0	Decreasing
78521935	Amphibians	Plethodontidae	Oedipina leptopoda	EN	14.9304	16.6303	7.69857	YES	0	0	0	Decreasing
56856	Amphibians	Craugastoridae	Pristimantis phragmipleuron	CR	6.37011	8.43228	7.69467	NO	0	1	0	Unknown
203404	Ray-finned fish	Cyprinidae	Acanthobrama hadiyahensis	CR	7.5649	9.47442	7.69269	YES	0	0	0	Decreasing
61762	Amphibians	Bufonidae	Werneria submontana	EN	4.42897	15.744	7.68565	YES	0	0	0	Decreasing
73727195	Amphibians	Megophryidae	Leptobrachella botsfordi	CR	6.30155	8.37904	7.68215	NO	0	0	0	Decreasing
NA	Amphibians	Allophrynidae	Allophryne relicta	NA	31.4091	32.1198	7.6786	NO	0	0	0	NA
80161781	Amphibians	Bufonidae	Adenomus kandianus	EN	7.93884	16.1418	7.67818	YES	0	0	0	Decreasing
54495	Amphibians	Bufonidae	Atelopus carbonerensis	CR	3.39943	8.39486	7.6775	YES	0	1	0	Decreasing
55360	Amphibians	Hemiphractidae	Gastrotheca stictopleura	EN	14.3019	16.5884	7.67677	YES	0	0	0	Decreasing
63658	Lepidosaurs	Gekkonidae	Phelsuma antanosy	CR	8.36488	8.46964	7.67338	YES	0	0	0	Decreasing
18917676	Lepidosaurs	Eublepharidae	Goniurosaurus bawanglingensis	EN	9.59291	15.9187	7.66623	YES	0	0	0	Decreasing
41226	Amphibians	Ceratobatrachidae	Alcalus mariae	EN	11.6599	15.6142	7.65727	NO	0	0	0	Decreasing
55243	Amphibians	Aromobatidae	Mannophryne cordilleriana	CR	7.4935	8.36151	7.64812	YES	0	0	0	Stable
56633	Amphibians	Eleutherodactylidae	Eleutherodactylus griphus	CR	7.36955	8.41175	7.64804	YES	0	0	0	Decreasing
17468	Ray-finned fish	Cyprinidae	Plagopterus argentissimus	CR	7.46633	8.25996	7.64175	YES	0	0	0	Decreasing
1319	Lepidosaurs	Dactyloidae	Anolis roosevelti	CR	5.1176	8.83182	7.64117	YES	1	1	0	Unknown
51061050	Amphibians	Plethodontidae	Oedipina chortiorum	CR	4.9299	8.49329	7.63852	YES	0	0	0	Decreasing
126710128	Chondrichthyes	Mobulidae	Mobula hypostoma	EN	9.96011	15.6452	7.63733	YES	0	0	0	Decreasing
23900	Amphibians	Bombinatoridae	Barbourula busuangensis	NT	34.5114	60.8572	7.63336	NO	0	0	0	Decreasing
59291	Amphibians	Plethodontidae	Pseudoeurycea orchileucos	EN	15.4212	15.9122	7.62643	YES	0	0	0	Decreasing
54515	Amphibians	Bufonidae	Atelopus guanujo	CR	3.24895	8.28333	7.6235	YES	0	1	0	Decreasing
79788960	Amphibians	Microhylidae	Cophyla noromalalae	EN	10.8444	15.5874	7.62285	NO	0	0	0	Decreasing
54551	Amphibians	Bufonidae	Atelopus simulatus	CR	3.50049	8.48563	7.62109	YES	0	1	0	Unknown
54371	Amphibians	Arthroleptidae	Arthroleptis francei	VU	27.6402	32.2203	7.61897	YES	0	0	0	Decreasing
10041	Testudines	Geoemydidae	Heosemys annandalii	EN	13.9863	15.9023	7.617	YES	0	0	0	Decreasing
135889	Amphibians	Telmatobiidae	Telmatobius sanborni	CR	5.67504	8.34474	7.61498	YES	0	0	0	Decreasing
4094	Lepidosaurs	Diploglossidae	Celestus duquesneyi	CR	5.11944	8.25012	7.61447	YES	0	0	0	Decreasing
22728808	Birds	Oceanitidae	Fregetta maoriana	CR	6.78504	8.2752	7.6134	YES	0	0	0	Unknown
NA	Ray-finned fish	Callichthyidae	Dianema urostriatum	NA	20.2976	27.4423	7.6131	NO	0	0	0	NA
74994414	Lepidosaurs	Dactyloidae	Anolis altavelensis	CR	5.40913	8.16153	7.61179	YES	0	0	0	Unknown
57226	Amphibians	Craugastoridae	Microkayla pinguis	CR	5.60134	8.33385	7.61135	NO	0	0	0	Decreasing
55459	Amphibians	Hylidae	Sarcohyla cyanomma	CR	3.91878	8.42066	7.61086	YES	0	1	0	Decreasing
11661	Ray-finned fish	Cobitidae	Parabotia curtus	CR	7.08038	8.5417	7.61076	YES	0	0	0	Decreasing
NA	Lepidosaurs	Scincidae	Sphenomorphus maculatus	NA	29.9811	30.4152	7.59493	NO	0	0	0	NA
75605414	Lepidosaurs	Sphaerodactylidae	Sphaerodactylus elasmorhynchus	CR	6.09072	8.3755	7.59014	YES	1	1	0	Unknown
18597	Mammals	Bovidae	Pseudoryx nghetinhensis	CR	8.41234	8.41897	7.58917	YES	0	0	0	Decreasing
10615	Amphibians	Hynobiidae	Hynobius hidamontanus	EN	16.4892	16.6253	7.58733	YES	0	0	0	Decreasing
61405	Chondrichthyes	Rajidae	Leucoraja melitensis	CR	5.87254	8.25754	7.58535	NO	0	0	0	Decreasing
NA	Ray-finned fish	Notocheiridae	Notocheirus hubbsi	NA	39.9326	61.9469	7.58311	NO	0	0	0	NA
100339944	Amphibians	Microhylidae	Rhombophryne savaka	EN	10.2771	15.0296	7.57967	NO	0	0	0	Decreasing
9281	Chondrichthyes	Carcharhinidae	Glyphis gangeticus	CR	1.70162	8.17976	7.57341	YES	0	0	0	Decreasing
63167	Chondrichthyes	Rhinobatidae	Rhinobatos jimbaranensis	VU	27.0134	34.2442	7.5623	NO	0	0	0	Decreasing
59495	Amphibians	Herpelidae	Boulengerula changamwensis	EN	14.4051	15.4692	7.56068	YES	0	0	0	Unknown
4097	Lepidosaurs	Diploglossidae	Celestus occiduus	CR	5.75246	8.5601	7.55193	YES	1	1	0	Unknown
NA	Ray-finned fish	Trachinidae	Echiichthys vipera	NA	29.5316	29.5316	7.55185	NO	0	0	0	NA
176204	Lepidosaurs	Diplodactylidae	Eurydactylodes occidentalis	CR	8.16811	8.24518	7.55107	YES	0	0	0	Decreasing
60203	Chondrichthyes	Triakidae	Mustelus schmitti	CR	17.269	18.0267	7.55018	YES	0	0	0	Decreasing
56090	Amphibians	Hyperoliidae	Arlequinus krebsi	EN	11.7139	15.274	7.54631	NO	0	0	0	Decreasing
57367	Amphibians	Telmatobiidae	Telmatobius verrucosus	CR	5.39277	8.27275	7.54541	YES	0	0	0	Decreasing
63109	Chondrichthyes	Arhynchobatidae	Rioraja agassizii	VU	31.414	32.1895	7.5438	YES	0	0	0	Decreasing
79130249	Amphibians	Microhylidae	Rhombophryne vaventy	EN	10.7004	15.2506	7.54278	NO	0	0	0	Decreasing
57499	Amphibians	Mantellidae	Wakea madinika	DD	33.0718	33.0718	7.5417	NO	0	0	0	Unknown
NA	Ray-finned fish	Callichthyidae	Dianema longibarbis	NA	20.2976	27.8263	7.54043	NO	0	0	0	NA
22695250	Birds	Accipitridae	Trigonoceps occipitalis	CR	7.93692	8.38023	7.53835	YES	0	0	0	Decreasing
19017787	Ray-finned fish	Cyprinidae	Acanthobrama tricolor	CR	8.14402	9.37137	7.53264	YES	0	1	0	Unknown
NA	Lepidosaurs	Teiidae	Medopheos edracanthus	NA	35.3424	35.3424	7.53097	NO	0	0	0	NA
5959	Testudines	Geoemydidae	Cuora aurocapitata	CR	1.04349	8.35435	7.52992	NO	0	0	1	NA
4096	Lepidosaurs	Diploglossidae	Celestus microblepharis	CR	5.6436	8.34113	7.52582	YES	1	0	0	Decreasing
54527	Amphibians	Bufonidae	Atelopus minutulus	CR	3.91419	8.18909	7.5239	YES	0	1	0	Decreasing
5493	Ray-finned fish	Atherinidae	Craterocephalus kailolae	CR	7.4309	8.27373	7.52243	YES	0	0	0	Unknown
NA	Ray-finned fish	Pholidichthyidae	Pholidichthys leucotaenia	NA	2.4036	32.0019	7.52192	NO	0	0	0	NA
177448	Lepidosaurs	Prosymnidae	Prosymna ornatissima	CR	6.13122	8.25765	7.51895	YES	0	0	0	Unknown
100339930	Amphibians	Microhylidae	Rhombophryne botabota	EN	11.187	16.0804	7.51356	NO	0	0	0	Decreasing
5956	Testudines	Geoemydidae	Cuora pani	CR	1.1602	8.30677	7.51251	NO	0	0	1	NA
NA	Ray-finned fish	Parazenidae	Cyttopsis cypho	NA	27.1202	27.6378	7.5105	NO	0	0	0	NA
136038	Amphibians	Bufonidae	Atelopus petersi	CR	3.28984	8.25743	7.50867	YES	0	1	1	Decreasing
12581	Ray-finned fish	Percichthyidae	Macquaria australasica	EN	11.3687	14.9854	7.50618	YES	0	0	0	Decreasing
75605435	Lepidosaurs	Sphaerodactylidae	Sphaerodactylus epiurus	CR	6.34348	8.2076	7.50258	YES	0	0	0	Decreasing
56693	Amphibians	Eleutherodactylidae	Eleutherodactylus klinikowskii	EN	0.843585	15.8665	7.49783	YES	0	0	1	Decreasing
7143	Amphibians	Eleutherodactylidae	Eleutherodactylus cavernicola	CR	4.68326	8.38139	7.49175	YES	0	0	0	Decreasing
180971	Ray-finned fish	Osphronemidae	Betta fusca	CR	8.42937	8.4932	7.48805	YES	0	1	0	Unknown
110847130	Chondrichthyes	Mobulidae	Mobula mobular	EN	9.32111	14.7347	7.48467	NO	0	0	0	Decreasing
54506	Amphibians	Bufonidae	Atelopus erythropus	CR	2.96505	8.16713	7.48069	YES	0	1	0	Decreasing
59420	Amphibians	Plethodontidae	Thorius narismagnus	CR	3.98143	8.18017	7.47196	YES	0	0	0	Decreasing
59394	Amphibians	Plethodontidae	Pseudoeurycea ruficauda	EN	7.73266	15.6116	7.46901	YES	0	0	0	Decreasing
19085854	Ray-finned fish	Cobitidae	Cobitis splendens	CR	7.47788	8.95848	7.46272	YES	0	0	0	Decreasing
187832	Amphibians	Rhacophoridae	Pseudophilautus tanu	EN	11.0061	15.9919	7.45466	NO	0	0	0	Decreasing
57069	Amphibians	Eleutherodactylidae	Eleutherodactylus zugi	EN	0.849735	15.7615	7.4541	YES	0	0	1	Decreasing
86466943	Amphibians	Microhylidae	Rhombophryne ornata	EN	10.6776	15.7609	7.4525	NO	0	0	0	Decreasing
189814	Amphibians	Rhacophoridae	Raorchestes resplendens	CR	7.84656	8.143	7.45197	YES	0	0	1	Decreasing
54895	Amphibians	Bufonidae	Werneria preussi	EN	3.26089	15.6331	7.44801	YES	0	0	0	Decreasing
NA	Amphibians	Rhacophoridae	Mercurana myristicapalustris	NA	37.071	37.3857	7.43031	NO	0	0	0	NA
212	Ray-finned fish	Cyprinidae	Acheilognathus elongatus	CR	8.24342	9.15612	7.42576	YES	0	0	1	Unknown
178278	Lepidosaurs	Dactyloidae	Anolis juangundlachi	CR	5.584	8.2054	7.42458	YES	0	0	0	Unknown
192931	Amphibians	Megophryidae	Leptobrachella applebyi	EN	13.0163	15.8463	7.42211	NO	0	0	0	Decreasing
55455	Amphibians	Hylidae	Hyloscirtus colymba	EN	11.5149	15.8071	7.42049	YES	0	0	0	Decreasing
170622240	Amphibians	Plethodontidae	Bolitoglossa celaque	CR	3.0038	8.20798	7.41465	YES	0	0	0	Stable
54538	Amphibians	Bufonidae	Atelopus pedimarmoratus	CR	2.76617	8.24362	7.41402	YES	1	1	0	Decreasing
56642	Amphibians	Eleutherodactylidae	Eleutherodactylus gundlachi	EN	15.6016	15.7162	7.41272	YES	0	0	1	Stable
58902	Amphibians	Rhacophoridae	Raorchestes shillongensis	CR	4.96259	8.05663	7.4126	YES	0	0	1	Decreasing
57454	Amphibians	Mantellidae	Mantidactylus albofrenatus	EN	15.0526	15.3764	7.40961	YES	0	0	0	Decreasing
18917757	Lepidosaurs	Eublepharidae	Goniurosaurus orientalis	EN	8.52667	15.5761	7.40731	YES	0	0	0	Decreasing
4592	Ray-finned fish	Labridae	Cheilinus undulatus	EN	13.2773	14.8563	7.39072	YES	0	0	1	Decreasing
NA	Ray-finned fish	Pholidichthyidae	Pholidichthys anguis	NA	2.4036	28.5886	7.38927	NO	0	0	0	NA
NA	Ray-finned fish	Muraenolepididae	Notomuraenobathys microcephalus	NA	34.4039	34.4089	7.38211	NO	0	0	0	NA
56310	Amphibians	Leptodactylidae	Adenomera lutzi	EN	13.1483	15.334	7.37914	NO	0	0	0	Decreasing
58905	Amphibians	Rhacophoridae	Pseudophilautus simba	CR	5.90497	8.24099	7.376	NO	0	0	0	Decreasing
78459148	Amphibians	Hemiphractidae	Cryptobatrachus ruthveni	EN	10.6418	15.1456	7.37498	YES	0	0	0	Unknown
61463	Lepidosaurs	Lacertidae	Acanthodactylus spinicauda	CR	6.01809	8.04578	7.37445	YES	0	0	1	Decreasing
57574	Amphibians	Megophryidae	Leptobrachella pluvialis	EN	10.6742	16.0062	7.37104	NO	0	0	0	Decreasing
59070	Amphibians	Ambystomatidae	Ambystoma taylori	CR	5.70257	8.1262	7.36831	NO	0	0	0	Unknown
135581	Ray-finned fish	Cobitidae	Cobitis taurica	CR	7.44022	8.6928	7.36796	YES	0	0	1	Unknown
79076234	Amphibians	Megophryidae	Leptobrachium kantonishikawai	CR	7.02789	8.18533	7.36606	NO	0	0	0	Decreasing
161631	Chondrichthyes	Rajidae	Leucoraja ocellata	EN	14.0756	16.1643	7.36562	NO	0	0	0	Decreasing
10722	Ray-finned fish	Osmeridae	Hypomesus transpacificus	CR	6.38116	7.95827	7.36558	YES	0	0	0	Decreasing
6005	Testudines	Trionychidae	Cyclanorbis senegalensis	VU	29.721	30.5894	7.3592	YES	0	0	0	Decreasing
NA	Lepidosaurs	Scincidae	Toenayar novemcarinata	NA	33.7324	34.144	7.35721	NO	0	0	0	NA
172935	Lepidosaurs	Gekkonidae	Paroedura tanjaka	EN	14.192	15.4263	7.3566	YES	0	0	1	Unknown
44659	Ray-finned fish	Bedotiidae	Rheocles derhami	CR	4.65311	8.72206	7.34904	YES	0	0	0	Decreasing
79101779	Amphibians	Rhacophoridae	Pseudophilautus sirilwijesundarai	CR	5.53346	8.00925	7.34744	YES	0	0	0	Decreasing
56234195	Lepidosaurs	Phyllodactylidae	Homonota rupicola	CR	4.69944	8.13169	7.34672	YES	0	0	0	Unknown
176214	Lepidosaurs	Diplodactylidae	Bavayia ornata	EN	15.0427	15.4197	7.34627	YES	0	0	0	Decreasing
57200	Amphibians	Craugastoridae	Psychrophrynella bagrecito	CR	5.5231	7.93588	7.34425	NO	0	0	0	Decreasing
55886	Amphibians	Hylidae	Plectrohyla tecunumani	CR	3.26241	8.17309	7.33926	YES	0	0	0	Decreasing
176145	Lepidosaurs	Scincidae	Lioscincus vivae	CR	6.83643	8.14856	7.33373	YES	0	0	0	Decreasing
64219	Lepidosaurs	Rhineuridae	Rhineura floridana	LC	130.063	130.063	7.32917	NO	0	0	1	Stable
56634	Amphibians	Eleutherodactylidae	Eleutherodactylus gryllus	EN	15.5831	15.7269	7.32759	YES	0	0	0	NA
56234213	Lepidosaurs	Phyllodactylidae	Homonota taragui	CR	4.68482	8.07738	7.3246	YES	0	0	0	Unknown
17628	Amphibians	Plethodontidae	Plethodon stormi	EN	13.8853	15.2209	7.32079	YES	0	0	1	Decreasing
56645	Amphibians	Eleutherodactylidae	Eleutherodactylus haitianus	EN	14.8791	15.5478	7.31848	YES	0	0	1	Decreasing
41758	Mammals	Platanistidae	Platanista gangetica	EN	15.1366	15.1444	7.3026	YES	0	0	0	Unknown
172532	Lepidosaurs	Chamaeleonidae	Rhampholeon platyceps	EN	8.4239	15.0676	7.30193	YES	0	0	0	Decreasing
59061	Amphibians	Ambystomatidae	Ambystoma leorae	CR	5.41886	8.00696	7.30008	YES	0	0	0	Decreasing
187929	Ray-finned fish	Balitoridae	Sewellia albisuera	CR	4.81208	7.87838	7.299	YES	0	0	1	Decreasing
64005	Lepidosaurs	Crotaphytidae	Crotaphytus antiquus	EN	15.0063	15.0074	7.29135	YES	0	0	1	Decreasing
NA	Lepidosaurs	Lacertidae	Holaspis guentheri	NA	24.8213	31.5302	7.29118	NO	0	0	0	NA
178478	Lepidosaurs	Dactyloidae	Anolis muralla	CR	5.62585	8.08783	7.28969	YES	0	0	0	Decreasing
29409	Lepidosaurs	Alopoglossidae	Ptychoglossus danieli	CR	6.82419	7.9897	7.28414	YES	0	0	0	Unknown
2173	Testudines	Trionychidae	Nilssonia nigricans	EW	5.80853	7.99987	7.2805	YES	0	0	0	Decreasing
56850	Amphibians	Craugastoridae	Pristimantis petrobardus	EN	10.2873	15.6837	7.27683	NO	0	0	0	Decreasing
172801	Lepidosaurs	Gekkonidae	Paroedura vazimba	VU	31.3547	31.5333	7.27346	YES	0	0	0	Decreasing
59606	Amphibians	Ichthyophiidae	Ichthyophis weberi	EN	10.9073	15.2729	7.27003	NO	0	0	0	Decreasing
54493	Amphibians	Bufonidae	Atelopus boulengeri	CR	3.85491	8.03455	7.26289	YES	0	0	1	Decreasing
57536	Amphibians	Mantellidae	Mantidactylus zolitschka	CR	7.69662	7.96233	7.25784	YES	0	0	0	Decreasing
56404	Amphibians	Eleutherodactylidae	Eleutherodactylus alcoae	EN	10.8341	15.2108	7.25702	YES	0	0	0	Unknown
18435521	Amphibians	Bufonidae	Atelopus ardila	CR	3.60934	7.99988	7.25518	NO	0	1	0	Decreasing
NA	Ray-finned fish	Belonidae	Strongylura strongylura	NA	32.9888	33.1094	7.25494	NO	0	0	0	NA
54491	Amphibians	Bufonidae	Atelopus balios	CR	2.78803	7.83127	7.25452	YES	0	0	0	Decreasing
54499	Amphibians	Bufonidae	Atelopus chocoensis	CR	2.83518	7.97742	7.25356	YES	0	1	0	Decreasing
150107194	Ray-finned fish	Cichlidae	Amphilophus flaveolus	CR	3.92133	7.63473	7.25036	YES	0	0	0	Decreasing
102709908	Lepidosaurs	Elapidae	Hemiaspis damelii	EN	14.7323	14.9265	7.24475	YES	0	0	0	Decreasing
10824	Testudines	Testudinidae	Indotestudo elongata	CR	5.76425	8.0079	7.2422	YES	0	0	0	Decreasing
136101	Amphibians	Craugastoridae	Microkayla harveyi	CR	5.34626	8.14993	7.23884	NO	0	0	0	Unknown
59391	Amphibians	Plethodontidae	Aquiloeurycea praecellens	CR	2.99356	8.01579	7.23774	NO	1	1	0	Decreasing
54514	Amphibians	Bufonidae	Atelopus glyphus	CR	2.54218	7.8519	7.23674	YES	0	0	0	Decreasing
78459104	Amphibians	Hemiphractidae	Cryptobatrachus pedroruizi	EN	10.2718	14.98	7.23614	YES	0	0	0	Decreasing
56973	Amphibians	Craugastoridae	Craugastor spatulatus	EN	11.0656	15.5866	7.23494	YES	0	0	0	Decreasing
56473	Amphibians	Eleutherodactylidae	Eleutherodactylus bresslerae	CR	6.12217	7.91961	7.23442	YES	0	0	1	Decreasing
225	Ray-finned fish	Acipenseridae	Acipenser nudiventris	CR	5.34748	7.6908	7.22899	YES	0	0	1	Decreasing
176154	Lepidosaurs	Diplodactylidae	Dierogekko inexpectatus	CR	6.38164	7.97036	7.22773	YES	0	0	0	Decreasing
14322	Ray-finned fish	Percichthyidae	Nannoperca variegata	EN	16.726	16.7381	7.22327	YES	0	0	0	Decreasing
19832	Mammals	Bovidae	Saiga tatarica	CR	7.89435	7.89435	7.221	YES	0	0	0	Decreasing
164562	Lepidosaurs	Lacertidae	Acanthodactylus harranensis	CR	6.13346	7.95477	7.21746	YES	0	0	1	Decreasing
NA	Lepidosaurs	Lacertidae	Meroles squamulosus	NA	30.9387	30.9699	7.21693	NO	0	0	0	NA
NA	Ray-finned fish	Cichlidae	Mikrogeophagus altispinosus	NA	29.1416	30.1703	7.21142	NO	0	0	0	NA
231	Ray-finned fish	Acipenseridae	Acipenser dabryanus	CR	5.34748	7.69274	7.21111	YES	0	1	1	Decreasing
48101579	Amphibians	Megophryidae	Leptobrachella bidoupensis	EN	12.6692	15.1541	7.20525	NO	0	0	0	Decreasing
18917767	Lepidosaurs	Eublepharidae	Goniurosaurus splendens	EN	8.88442	14.938	7.20486	YES	0	0	0	Decreasing
61844	Amphibians	Microhylidae	Choerophryne sanguinopicta	CR	5.7367	7.95843	7.20408	NO	0	0	0	Decreasing
23124	Amphibians	Pipidae	Xenopus gilli	EN	14.9908	15.0263	7.20393	YES	0	0	0	Decreasing
22692181	Birds	Heliornithidae	Heliopais personatus	EN	14.5132	15.0295	7.19997	YES	0	0	0	Decreasing
55587	Amphibians	Hylidae	Hyloscirtus pantostictus	CR	7.79498	7.92272	7.1999	YES	0	0	0	Decreasing
58890	Amphibians	Rhacophoridae	Pseudophilautus procax	CR	4.87215	7.84956	7.19637	NO	0	0	0	Unknown
181852	Ray-finned fish	Nothobranchiidae	Fundulopanchax arnoldi	EN	13.0888	14.8914	7.19541	YES	0	0	0	Decreasing
13160676	Ray-finned fish	Cyprinidae	Iberochondrostoma olisiponensis	CR	7.16764	7.46144	7.19417	YES	0	0	1	Decreasing
44505	Ray-finned fish	Aplocheilidae	Pachypanchax patriciae	EN	9.97095	15.2899	7.19233	YES	0	0	0	Unknown
57675	Amphibians	Microhylidae	Anodonthyla montana	VU	27.3484	31.1157	7.18727	YES	0	0	0	Stable
178176	Amphibians	Hyperoliidae	Morerella cyanophthalma	VU	15.9087	31.3526	7.185	NO	0	0	0	Decreasing
54436	Amphibians	Arthroleptidae	Leptodactylodon perreti	EN	4.27042	15.13	7.18472	YES	0	0	0	Decreasing
56525	Amphibians	Eleutherodactylidae	Eleutherodactylus corona	CR	5.54691	7.93698	7.18421	YES	0	0	1	Decreasing
NA	Testudines	Chelidae	Platemys platycephala	NA	31.1192	31.1281	7.18359	NO	0	0	0	NA
192140	Lepidosaurs	Viperidae	Protobothrops mangshanensis	EN	15.0121	15.2657	7.18129	YES	0	0	0	Decreasing
12650	Mammals	Thylacomyidae	Macrotis lagotis	VU	29.4072	29.4072	7.18018	YES	0	0	0	Decreasing
57192	Amphibians	Odontophrynidae	Proceratophrys moratoi	CR	6.64308	7.9154	7.17341	YES	0	1	1	Decreasing
178336	Lepidosaurs	Dactyloidae	Anolis nubilus	CR	7.86102	7.97203	7.17268	YES	0	0	0	Unknown
47103187	Lepidosaurs	Scincidae	Spondylurus lineolatus	CR	5.1905	8.0266	7.16786	YES	0	1	0	Decreasing
54526	Amphibians	Bufonidae	Atelopus mindoensis	CR	3.56951	7.76692	7.16751	YES	0	1	0	Decreasing
54558	Amphibians	Bufonidae	Atelopus tamaense	CR	3.18001	7.94314	7.16518	YES	0	0	0	Decreasing
59412	Amphibians	Plethodontidae	Thorius infernalis	CR	2.87751	7.85668	7.16428	YES	0	0	0	Decreasing
NA	Lepidosaurs	Viperidae	Deinagkistrodon acutus	NA	29.7311	29.732	7.15893	NO	0	0	0	NA
NA	Ray-finned fish	Malacanthidae	Malacanthus brevirostris	NA	26.4625	26.5905	7.15873	NO	0	0	0	NA
58254	Amphibians	Conrauidae	Conraua robusta	VU	29.0206	30.6863	7.15656	YES	0	0	0	Decreasing
57210	Amphibians	Craugastoridae	Phrynopus heimorum	CR	5.43284	7.88043	7.15131	NO	0	0	0	Decreasing
181696	Ray-finned fish	Nothobranchiidae	Fundulopanchax sjostedti	EN	14.3273	16.2726	7.14971	YES	0	0	0	Unknown
91315727	Ray-finned fish	Osphronemidae	Parosphromenus paludicola	EN	10.2556	14.5833	7.14818	YES	0	0	0	Unknown
87736069	Amphibians	Craugastoridae	Pristimantis hoogmoedi	CR	6.22383	7.86169	7.14728	NO	0	0	0	Decreasing
61505	Lepidosaurs	Lacertidae	Gallotia intermedia	CR	4.34018	7.75184	7.14664	YES	0	0	1	Increasing
57223	Amphibians	Craugastoridae	Oreobates pereger	EN	9.88475	14.8788	7.14664	YES	0	0	0	Unknown
194299	Ray-finned fish	Albulidae	Albula glossodonta	VU	35.8637	35.8637	7.14532	YES	0	0	0	Decreasing
172981	Lepidosaurs	Gekkonidae	Phelsuma klemmeri	EN	14.9652	14.9834	7.1452	YES	0	0	0	Unknown
136145	Amphibians	Craugastoridae	Microkayla kallawaya	CR	5.43336	7.91035	7.1449	NO	0	0	0	Decreasing
NA	Lepidosaurs	Lacertidae	Holaspis laevis	NA	24.8213	31.3331	7.13702	NO	0	0	0	NA
56432	Amphibians	Eleutherodactylidae	Eleutherodactylus armstrongi	EN	10.7192	15.1897	7.13688	YES	0	0	0	Decreasing
79681353	Amphibians	Megophryidae	Leptobrachella kecil	CR	5.40281	8.03	7.13507	NO	0	0	0	Decreasing
44462	Ray-finned fish	Ariidae	Arius uncinatus	CR	6.48105	8.22413	7.13441	YES	0	0	0	Decreasing
44497	Ray-finned fish	Cichlidae	Paretroplus gymnopreopercularis	CR	6.61906	7.70735	7.13285	YES	0	0	0	Decreasing
NA	Ray-finned fish	Mugilidae	Oedalechilus labeo	NA	33.9018	33.9018	7.1319	NO	0	0	0	NA
191699	Ray-finned fish	Goodeidae	Allotoca zacapuensis	CR	3.95253	7.77473	7.13112	YES	0	0	0	Decreasing
22696649	Birds	Sulidae	Papasula abbotti	EN	14.6481	14.6532	7.12789	YES	0	0	0	Stable
16545046	Ray-finned fish	Malacanthidae	Lopholatilus chamaeleonticeps	EN	16.9675	16.9678	7.11467	YES	0	0	0	Decreasing
196628	Lepidosaurs	Scincidae	Leiolopisma alazon	CR	4.49688	7.9877	7.1139	YES	0	0	0	Decreasing
22697478	Birds	Threskiornithidae	Bostrychia bocagei	CR	7.57851	7.73206	7.11238	YES	0	0	0	Decreasing
85628040	Amphibians	Microhylidae	Rhombophryne longicrus	EN	9.49848	14.6977	7.10857	NO	0	0	0	Decreasing
41871	Chondrichthyes	Centrophoridae	Centrophorus squamosus	EN	21.7837	30.1416	7.107	NO	0	0	0	Decreasing
NA	Amphibians	Dicroglossidae	Limnonectes sisikdagu	NA	34.9376	35.6198	7.10448	NO	0	0	0	NA
174591	Amphibians	Arthroleptidae	Arthroleptis krokosua	CR	7.59422	8.03115	7.1037	YES	0	0	0	Decreasing
NA	Lepidosaurs	Phyllodactylidae	Garthia gaudichaudii	NA	12.3036	33.3821	7.10312	NO	0	0	0	NA
44461	Ray-finned fish	Ariidae	Arius festinus	CR	5.64593	7.85348	7.10214	YES	0	0	0	Decreasing
65134839	Ray-finned fish	Hypoptychidae	Hypoptychus dybowskii	NA	30.7568	31.1473	7.09326	NO	0	0	0	Unknown
54535	Amphibians	Bufonidae	Atelopus oxyrhynchus	CR	2.44266	7.92708	7.09155	YES	0	1	0	Decreasing
NA	Ray-finned fish	Mugilidae	Agonostomus monticola	NA	34.3855	34.3869	7.08703	NO	0	0	0	NA
61454	Lepidosaurs	Lacertidae	Acanthodactylus beershebensis	CR	7.3217	7.91109	7.08417	YES	0	0	1	Decreasing
122055686	Ray-finned fish	Sillaginidae	Sillago parvisquamis	EN	16.3939	16.4319	7.08315	YES	0	0	0	Decreasing
NA	Ray-finned fish	Cichlidae	Mikrogeophagus ramirezi	NA	29.1416	30.2545	7.08272	NO	0	0	0	NA
114823717	Ray-finned fish	Gobiidae	Eviota ocellifer	CR	7.94459	8.11497	7.07781	YES	0	0	0	Decreasing
54489	Amphibians	Bufonidae	Atelopus arsyecue	CR	2.71358	7.85046	7.07554	YES	0	0	0	Decreasing
6506	Mammals	Talpidae	Desmana moschata	EN	13.24	14.7404	7.07496	YES	0	0	0	Decreasing
163414	Testudines	Geoemydidae	Cuora mouhotii	EN	14.2745	14.8791	7.0709	YES	0	0	0	Decreasing
18182	Ray-finned fish	Cyprinidae	Probarbus jullieni	CR	5.41162	7.63018	7.06629	YES	0	0	0	Decreasing
NA	Ray-finned fish	Sphyraenidae	Sphyraena jello	NA	30.5048	31.8669	7.06515	NO	0	0	0	NA
56567	Amphibians	Eleutherodactylidae	Eleutherodactylus dolomedes	CR	6.00443	7.89497	7.06298	YES	0	0	1	Decreasing
79101722	Amphibians	Rhacophoridae	Pseudophilautus bambaradeniyai	CR	5.08717	7.7792	7.06193	YES	0	0	0	Decreasing
61522	Lepidosaurs	Lacertidae	Parvilacerta fraasii	EN	13.4864	14.5792	7.05585	YES	0	0	1	Decreasing
191187	Ray-finned fish	Atherinopsidae	Chirostoma riojai	CR	6.14907	8.35561	7.05496	YES	0	0	0	Decreasing
57392	Amphibians	Mantellidae	Boophis blommersae	VU	29.276	29.5534	7.04794	YES	0	0	0	Decreasing
5933	Ray-finned fish	Cyprinodontidae	Cualac tessellatus	VU	33.1158	33.1158	7.047	YES	0	0	0	Unknown
59328	Amphibians	Plethodontidae	Parvimolge townsendi	VU	25.2558	29.6533	7.03237	YES	0	0	0	Decreasing
16577745	Amphibians	Phrynobatrachidae	Phrynobatrachus danko	EN	14.5136	14.8696	7.02815	YES	0	0	0	Decreasing
16892	Mammals	Phascolarctidae	Phascolarctos cinereus	VU	29.1375	29.2592	7.0234	YES	0	0	0	Decreasing
161675	Chondrichthyes	Pentanchidae	Holohalaelurus punctatus	EN	10.2346	14.3122	7.02268	NO	0	0	0	Decreasing
166191	Ray-finned fish	Cyprinidae	Procypris mera	NA	24.6774	26.9197	7.01719	NO	0	0	1	Unknown
180894	Ray-finned fish	Ellopostomatidae	Ellopostoma mystax	EN	4.07343	14.385	7.01244	YES	0	0	0	Decreasing
6557	Mammals	Rhinocerotidae	Diceros bicornis	CR	6.23582	7.69431	7.00486	YES	0	0	0	Increasing
5672	Crocodylians	Crocodylidae	Crocodylus mindorensis	CR	7.25406	7.66503	7.00257	YES	0	0	0	Decreasing
60324	Ray-finned fish	Chanidae	Chanos chanos	LC	126.3	126.3	7.00248	NO	0	0	0	Unknown
NA	Ray-finned fish	Cynodontidae	Rhaphiodon vulpinus	NA	28.3714	28.3719	7.00182	NO	0	0	0	NA
NA	Lepidosaurs	Lacertidae	Nucras boulengeri	NA	37.7762	38.6123	6.99497	NO	0	0	0	NA
59439	Amphibians	Salamandridae	Cynops chenggongensis	CR	5.11321	7.56096	6.99324	YES	0	0	0	Decreasing
203152	Lepidosaurs	Leiosauridae	Pristidactylus casuhatiensis	CR	6.38145	7.66852	6.98717	YES	0	0	0	Unknown
104717581	Lepidosaurs	Gekkonidae	Gekko lauhachindai	CR	5.68576	7.70061	6.98622	YES	0	0	0	Decreasing
22698530	Birds	Hydrobatidae	Hydrobates macrodactylus	CR	6.26494	7.65639	6.98092	YES	1	1	0	Unknown
NA	Ray-finned fish	Sphyraenidae	Sphyraena putnamae	NA	30.5048	31.6402	6.97881	NO	0	0	0	NA
66083824	Lepidosaurs	Sphaerodactylidae	Gonatodes purpurogularis	EN	14.5816	14.7543	6.97731	YES	0	0	0	Decreasing
57023	Amphibians	Eleutherodactylidae	Eleutherodactylus unicolor	VU	22.4614	29.3978	6.9738	YES	0	0	0	Decreasing
61479	Lepidosaurs	Scincidae	Chalcides mauritanicus	EN	14.6337	15.1655	6.97069	YES	0	0	1	Decreasing
54478	Amphibians	Bufonidae	Ghatophryne ornata	EN	8.49419	14.0831	6.96915	YES	0	0	1	Decreasing
178363	Lepidosaurs	Dactyloidae	Anolis amplisquamosus	CR	5.27831	7.8039	6.95774	YES	0	0	0	Decreasing
135994	Amphibians	Arthroleptidae	Arthroleptis nlonakoensis	EN	10.3706	14.4519	6.95493	NO	0	0	0	Decreasing
112682140	Amphibians	Microhylidae	Oreophryne matawan	CR	5.5506	7.74241	6.94389	NO	0	0	0	Decreasing
79101755	Amphibians	Rhacophoridae	Pseudophilautus newtonjayawardanei	CR	4.64309	7.63378	6.94383	YES	0	0	0	Decreasing
172792	Lepidosaurs	Gekkonidae	Uroplatus ebenaui	VU	29.2764	29.5487	6.93929	YES	0	0	0	Decreasing
NA	Lepidosaurs	Scincidae	Eutropis dissimilis	NA	27.6625	28.4173	6.93883	NO	0	0	0	NA
79101737	Amphibians	Rhacophoridae	Pseudophilautus jagathgunawardanai	CR	4.49823	7.63043	6.9319	YES	0	0	0	Decreasing
78576297	Amphibians	Plethodontidae	Pseudoeurycea kuautli	CR	3.91525	7.67974	6.9318	YES	0	0	0	Decreasing
23207	Ray-finned fish	Percidae	Zingel asper	CR	7.04562	7.32916	6.9272	YES	0	0	1	Decreasing
169440	Ray-finned fish	Nothobranchiidae	Aphyosemion alpha	EN	13.652	14.3142	6.92665	YES	0	0	1	Unknown
75084878	Lepidosaurs	Dactyloidae	Anolis reconditus	EN	13.3213	15.3844	6.92101	YES	0	0	0	Decreasing
13997902	Amphibians	Pipidae	Xenopus lenduensis	CR	6.93951	7.61834	6.92063	YES	0	0	0	Decreasing
58857	Amphibians	Rhacophoridae	Philautus jacobsoni	CR	6.59509	7.73439	6.9169	YES	1	1	0	Decreasing
18875	Ray-finned fish	Gasterosteidae	Pungitius hellenicus	CR	6.6235	7.71008	6.91531	YES	0	0	0	Decreasing
55461	Amphibians	Hylidae	Boana cymbalum	CR	6.59648	7.66432	6.912	YES	0	1	1	Decreasing
122900298	Ray-finned fish	Plotosidae	Neosilurus gloveri	CR	6.73229	7.67395	6.91093	YES	0	0	0	Decreasing
NA	Lepidosaurs	Dactyloidae	Anolis etheridgei	NA	25.7764	27.5751	6.90246	NO	0	0	0	NA
59387	Amphibians	Plethodontidae	Pseudoeurycea mixcoatl	CR	2.64431	7.64804	6.89199	YES	0	0	0	Decreasing
57408	Amphibians	Mantellidae	Boophis laurenti	EN	12.5023	14.3589	6.89116	YES	0	0	0	Decreasing
77342653	Amphibians	Aromobatidae	Aromobates ornatissimus	EN	7.57051	14.2593	6.88876	YES	0	0	0	Unknown
8813	Ray-finned fish	Galaxiidae	Galaxias postvectis	EN	14.3617	14.3617	6.88532	YES	0	0	0	Decreasing
198582	Ray-finned fish	Clupeidae	Sardinella maderensis	VU	36.787	37.1624	6.88213	YES	0	0	0	Unknown
NA	Ray-finned fish	Sphyraenidae	Sphyraena flavicauda	NA	34.2892	34.2907	6.88099	NO	0	0	0	NA
17822	Testudines	Podocnemididae	Podocnemis expansa	VU	29.2143	29.5991	6.87636	YES	0	0	1	NA
56493	Amphibians	Eleutherodactylidae	Eleutherodactylus caribe	CR	3.48583	7.65143	6.87356	YES	0	0	1	Unknown
178689	Lepidosaurs	Gekkonidae	Phelsuma flavigularis	EN	14.777	14.8446	6.87186	YES	0	0	0	Decreasing
164692174	Ray-finned fish	Poeciliidae	Priapichthys puetzi	CR	5.25139	7.4277	6.87127	YES	0	0	0	Unknown
79680110	Amphibians	Microhylidae	Stumpffia kibomena	EN	9.21909	13.9294	6.87119	NO	0	0	0	Decreasing
54509	Amphibians	Bufonidae	Atelopus famelicus	CR	2.69038	7.54796	6.8662	YES	0	0	0	Decreasing
58391	Amphibians	Dicroglossidae	Nannophrys marmorata	EN	10.5621	14.3677	6.86309	YES	0	0	0	Decreasing
56592	Amphibians	Eleutherodactylidae	Eleutherodactylus eunaster	CR	3.54674	7.68044	6.8588	YES	0	0	1	Unknown
61865	Amphibians	Ranidae	Huia melasma	DD	39.1254	39.1255	6.85347	NO	0	0	0	Unknown
8881	Lepidosaurs	Lacertidae	Gallotia simonyi	CR	1.29963	7.51228	6.85335	YES	0	0	1	Stable
181072	Ray-finned fish	Cyprinidae	Danio erythromicron	EN	13.8302	14.2325	6.85095	YES	0	0	0	Decreasing
191694	Ray-finned fish	Goodeidae	Allotoca catarinae	CR	1.7276	7.44865	6.85011	YES	0	0	0	Decreasing
178646	Lepidosaurs	Scincidae	Pseudoacontias angelorum	EN	7.06375	13.6149	6.85004	YES	0	0	1	Unknown
19495	Mammals	Rhinocerotidae	Rhinoceros sondaicus	CR	4.8557	7.42955	6.84684	YES	0	0	0	Stable
NA	Ray-finned fish	Platycephalidae	Platycephalus laevigatus	NA	33.3842	33.3842	6.84317	NO	0	0	0	NA
55060	Amphibians	Aromobatidae	Allobates caeruleodactylus	DD	35.6739	35.7929	6.84222	NO	0	0	1	Unknown
58866	Amphibians	Rhacophoridae	Pseudophilautus lunatus	CR	7.09825	7.57139	6.83326	YES	0	0	0	Decreasing
22685025	Birds	Psittacidae	Psittrichas fulgidus	VU	30.0475	30.0524	6.83209	YES	0	0	0	Decreasing
61502	Lepidosaurs	Lacertidae	Gallotia bravoana	CR	1.30256	7.57241	6.82861	YES	0	0	1	Increasing
54811	Amphibians	Bufonidae	Didynamipus sjostedti	VU	22.535	29.0853	6.82851	YES	0	0	0	Decreasing
57143	Amphibians	Leptodactylidae	Leptodactylus magistris	CR	6.11032	7.38305	6.8283	NO	0	0	0	Unknown
NA	Lepidosaurs	Agamidae	Ptyctolaemus gularis	NA	28.8733	29.5378	6.82726	NO	0	0	0	NA
59375	Amphibians	Plethodontidae	Pseudoeurycea conanti	EN	12.3845	14.1677	6.82626	YES	0	0	0	Unknown
10355	Amphibians	Hylidae	Bokermannohyla izecksohni	CR	6.02601	7.61664	6.82297	NO	0	1	1	Decreasing
NA	Chondrichthyes	Rhinobatidae	Rhinobatos microphthalmus	NA	8.8612	29.0971	6.82173	NO	0	0	0	NA
57983	Amphibians	Brevicipitidae	Probreviceps uluguruensis	EN	11.4331	14.0597	6.81912	YES	0	0	0	Unknown
56813	Amphibians	Eleutherodactylidae	Eleutherodactylus orcutti	CR	5.9307	7.49886	6.81332	YES	0	1	0	Decreasing
22697531	Birds	Threskiornithidae	Pseudibis davisoni	CR	6.87998	7.65785	6.80904	YES	0	0	0	Decreasing
48086163	Amphibians	Hylidae	Ololygon muriciensis	CR	6.53195	7.41769	6.8042	NO	0	0	0	Decreasing
57546	Amphibians	Megophryidae	Leptobrachella palmata	CR	5.82116	7.29991	6.80415	NO	0	0	0	Decreasing
21574	Ray-finned fish	Telmatherinidae	Marosatherina ladigesi	VU	19.9046	37.2065	6.80265	YES	0	0	0	Decreasing
NA	Lepidosaurs	Eublepharidae	Holodactylus africanus	NA	17.4741	32.0577	6.80183	NO	0	0	0	NA
172429	Ray-finned fish	Cyprinidae	Barbodes wynaadensis	CR	4.08196	7.88309	6.79871	YES	0	0	1	Decreasing
61501	Lepidosaurs	Lacertidae	Gallotia auaritae	CR	5.4322	7.54859	6.79597	YES	1	1	1	Unknown
56911	Amphibians	Craugastoridae	Pristimantis rhodoplichus	EN	10.9939	13.5088	6.79439	YES	0	0	0	Decreasing
158467	Amphibians	Bufonidae	Atelopus patazensis	CR	2.98142	7.62395	6.79435	YES	0	0	0	Decreasing
22698562	Birds	Hydrobatidae	Hydrobates homochroa	EN	12.9585	14.089	6.79347	YES	0	0	0	Decreasing
57322	Amphibians	Leptodactylidae	Rupirana cardosoi	NT	54.3596	54.3596	6.78992	NO	0	0	1	Decreasing
7145	Amphibians	Eleutherodactylidae	Eleutherodactylus junori	CR	5.90754	7.50432	6.78727	YES	0	0	0	Decreasing
57998	Amphibians	Microhylidae	Scaphiophryne gottlebei	EN	13.8451	13.8455	6.78677	YES	0	0	0	Decreasing
NA	Ray-finned fish	Glaucosomatidae	Glaucosoma hebraicum	NA	25.8814	26.8445	6.7857	NO	0	0	0	NA
161719	Chondrichthyes	Dasyatidae	Fluvitrygon kittipongi	EN	8.94439	13.6782	6.78482	NO	0	0	0	Decreasing
54540	Amphibians	Bufonidae	Atelopus petriruizi	CR	2.15857	7.43912	6.78462	NO	0	1	0	Decreasing
56526	Amphibians	Craugastoridae	Pristimantis cosnipatae	CR	5.69678	7.50802	6.7842	NO	0	0	0	Decreasing
187822	Amphibians	Rhacophoridae	Gracixalus quyeti	EN	13.8634	14.1274	6.78392	YES	0	0	0	Unknown
56034	Amphibians	Hemiphractidae	Stefania roraimae	EN	10.9324	13.8079	6.78227	YES	0	0	0	Unknown
9010	Testudines	Testudinidae	Aldabrachelys gigantea	VU	22.1847	28.0377	6.77924	YES	0	0	1	NA
112683348	Amphibians	Microhylidae	Oreophryne penelopeia	CR	5.92589	7.34182	6.77832	NO	0	0	0	Decreasing
136047	Amphibians	Craugastoridae	Oreobates ayacucho	EN	8.26776	14.5906	6.77801	NO	0	0	0	Unknown
9031	Amphibians	Myobatrachidae	Geocrinia alba	CR	6.86748	7.4553	6.77739	YES	0	0	1	Decreasing
22705877	Birds	Corvidae	Zavattariornis stresemanni	EN	14.0863	14.0863	6.77499	YES	0	0	0	Decreasing
56718	Amphibians	Craugastoridae	Pristimantis lichenoides	CR	5.21681	7.4667	6.77286	NO	0	0	0	Decreasing
NA	Ray-finned fish	Cyprinidae	Trigonopoma gracile	NA	29.4242	29.6083	6.77146	NO	0	0	0	NA
161717	Chondrichthyes	Somniosidae	Scymnodon ringens	VU	31.1062	31.485	6.77102	NO	0	0	0	Decreasing
58209	Amphibians	Ranidae	Amolops hainanensis	EN	12.0953	15.0955	6.76995	NO	0	0	0	Decreasing
56402	Amphibians	Craugastoridae	Pristimantis albericoi	CR	4.92918	7.43136	6.76813	NO	0	1	0	Unknown
90330470	Ray-finned fish	Osteoglossidae	Scleropages inscriptus	NA	22.2386	28.558	6.76741	NO	0	0	0	Unknown
182888	Ray-finned fish	Nothobranchiidae	Aphyosemion bamilekorum	EN	10.4502	13.5944	6.76479	YES	0	0	1	Unknown
NA	Ray-finned fish	Mugilidae	Sicamugil hamiltonii	NA	33.9627	33.9675	6.75946	NO	0	0	0	NA
54529	Amphibians	Bufonidae	Atelopus mucubajiensis	CR	2.47311	7.62464	6.75469	YES	0	0	0	Decreasing
169372	Ray-finned fish	Goodeidae	Allotoca diazi	CR	0.714701	7.4459	6.75105	YES	0	0	0	Decreasing
191108	Ray-finned fish	Anguillidae	Anguilla rostrata	EN	8.74771	14.2391	6.74676	YES	0	0	0	Decreasing
191697	Ray-finned fish	Goodeidae	Allotoca meeki	CR	0.714701	7.47055	6.74604	YES	0	0	0	Decreasing
174139	Lepidosaurs	Teiidae	Pholidoscelis corvinus	CR	5.78377	7.43453	6.74581	YES	0	0	0	Unknown
41576	Mammals	Cheirogaleidae	Cheirogaleus sibreei	CR	7.51997	7.76545	6.74471	YES	0	0	0	Decreasing
NA	Ray-finned fish	Anguillidae	Neoanguilla nepalensis	NA	27.4417	27.4417	6.73776	NO	0	0	0	NA
79101771	Amphibians	Rhacophoridae	Pseudophilautus samarakoon	CR	4.53919	7.39293	6.7374	YES	0	0	0	Decreasing
87736123	Amphibians	Craugastoridae	Pristimantis longicorpus	CR	6.09462	7.59248	6.73299	NO	0	0	0	Unknown
NA	Ray-finned fish	Cyprinidae	Procypris rabaudi	NA	24.6774	27.1769	6.73098	NO	0	0	0	NA
10800	Lepidosaurs	Iguanidae	Iguana delicatissima	CR	7.15099	7.36302	6.7204	YES	0	0	0	Decreasing
55236	Amphibians	Dendrobatidae	Ameerega silverstonei	EN	12.3413	14.7205	6.71898	YES	0	0	0	Decreasing
144231367	Amphibians	Dendrobatidae	Oophaga histrionica	CR	7.0593	7.33001	6.71896	YES	0	0	0	Decreasing
182306	Ray-finned fish	Nothobranchiidae	Epiplatys coccinatus	CR	7.08633	7.38015	6.71485	YES	0	0	0	Unknown
161425	Chondrichthyes	Rajidae	Raja undulata	EN	10.3991	13.921	6.71247	NO	0	0	1	Decreasing
59301	Amphibians	Plethodontidae	Nototriton saslaya	CR	6.94033	7.46548	6.70115	YES	0	0	0	Decreasing
135988	Amphibians	Brevicipitidae	Probreviceps durirostris	EN	7.62834	13.5635	6.69589	YES	0	0	0	Unknown
178708	Lepidosaurs	Viperidae	Protobothrops sieversorum	EN	12.0918	13.9064	6.69547	YES	0	0	0	Unknown
56590	Amphibians	Eleutherodactylidae	Eleutherodactylus etheridgei	EN	12.9952	13.6171	6.68326	YES	0	0	1	Stable
1118	Lepidosaurs	Teiidae	Pholidoscelis polops	EN	12.6365	13.7878	6.67835	YES	0	0	0	Unknown
78584355	Amphibians	Craugastoridae	Microkayla teqta	CR	5.47711	7.37379	6.67595	NO	0	0	0	Unknown
136131	Amphibians	Salamandridae	Calotriton arnoldi	CR	4.21918	7.28907	6.67057	YES	0	0	1	Decreasing
59452	Amphibians	Salamandridae	Notophthalmus meridionalis	EN	13.8435	14.0591	6.66985	YES	0	0	1	Decreasing
49570575	Amphibians	Microhylidae	Cophyla olgae	EN	8.46466	14.14	6.6654	NO	0	0	0	Decreasing
11374	Mammals	Pteropodidae	Latidens salimalii	EN	13.7436	14.2636	6.66356	YES	0	0	0	Decreasing
22693899	Birds	Charadriidae	Thinornis novaeseelandiae	EN	13.155	14.0221	6.65503	YES	0	0	0	Stable
58119	Amphibians	Phrynobatrachidae	Phrynobatrachus irangi	EN	11.3754	14.5592	6.65501	NO	0	0	0	Decreasing
49569966	Amphibians	Mantellidae	Guibemantis wattersoni	EN	13.3769	13.6728	6.6508	YES	0	0	0	Decreasing
57982	Amphibians	Brevicipitidae	Probreviceps rungwensis	EN	7.58423	13.8907	6.64844	YES	0	0	0	Unknown
56440	Amphibians	Eleutherodactylidae	Eleutherodactylus auriculatoides	EN	10.9279	13.9489	6.648	YES	0	0	1	Decreasing
57843	Amphibians	Microhylidae	Kalophrynus palmatissimus	EN	12.4102	14.2613	6.6466	NO	0	0	0	Decreasing
17763	Ray-finned fish	Atherinopsidae	Poblana ferdebueni	CR	3.70471	7.55158	6.64553	YES	0	0	0	Decreasing
22688565	Birds	Strigidae	Otus ireneae	EN	12.8944	14.2088	6.64541	YES	0	0	0	Decreasing
18917684	Lepidosaurs	Eublepharidae	Goniurosaurus catbaensis	EN	12.6705	14.1151	6.64496	YES	0	0	0	Unknown
78458778	Amphibians	Plethodontidae	Chiropterotriton miquihuanus	EN	7.30445	14.0486	6.64189	NO	0	0	0	Stable
NA	Lepidosaurs	Eublepharidae	Holodactylus cornii	NA	17.4741	30.7905	6.64012	NO	0	0	0	NA
15635	Crocodylians	Crocodylidae	Osteolaemus tetraspis	VU	25.3042	27.5169	6.63934	YES	0	0	1	NA
63131	Chondrichthyes	Rhinobatidae	Rhinobatos rhinobatos	CR	10.1817	13.3125	6.63601	NO	0	0	0	Decreasing
59134	Amphibians	Plethodontidae	Batrachoseps wrighti	VU	8.15336	28.4488	6.63118	YES	0	0	1	Decreasing
39361	Chondrichthyes	Triakidae	Triakis acutipinna	EN	11.0419	12.9478	6.62954	NO	0	0	0	Decreasing
56484	Amphibians	Craugastoridae	Pristimantis cacao	CR	5.39435	7.39233	6.62641	NO	0	0	0	Decreasing
59408	Amphibians	Plethodontidae	Thorius aureus	CR	5.14611	7.27515	6.62066	YES	0	0	0	Decreasing
40488	Mammals	Ornithorhynchidae	Ornithorhynchus anatinus	NT	49.6991	51.2378	6.61663	NO	0	0	0	Decreasing
48443321	Lepidosaurs	Phyllodactylidae	Phyllodactylus pulcher	CR	5.91052	7.16475	6.61009	YES	0	0	0	Decreasing
58829	Amphibians	Rhacophoridae	Raorchestes chalazodes	CR	4.61545	7.30658	6.60467	NO	0	0	1	Decreasing
4997	Lepidosaurs	Teiidae	Cnemidophorus vanzoi	CR	6.29302	7.49746	6.60415	YES	0	0	0	Increasing
NA	Lepidosaurs	Scincidae	Corucia zebrata	NA	27.2235	27.2235	6.591	NO	0	0	0	NA
102346280	Lepidosaurs	Scincidae	Larutia penangensis	CR	5.79148	7.35903	6.59046	YES	0	0	0	Unknown
22692053	Birds	Gruidae	Leucogeranus leucogeranus	CR	7.25552	7.25552	6.59038	YES	0	0	0	Decreasing
75084785	Lepidosaurs	Dactyloidae	Anolis placidus	EN	10.3912	13.6123	6.58797	YES	0	0	0	Decreasing
44595	Chondrichthyes	Rhinopteridae	Rhinoptera brasiliensis	VU	10.1078	13.6777	6.58783	NO	0	0	0	Decreasing
55443	Amphibians	Hylidae	Hyloscirtus charazani	CR	6.5911	7.45005	6.58671	YES	0	0	0	Decreasing
194324	Amphibians	Plethodontidae	Bolitoglossa tzultacaj	CR	5.10804	7.24949	6.58079	YES	0	0	0	Decreasing
44565	Chondrichthyes	Mitsukurinidae	Mitsukurina owstoni	LC	129.961	129.961	6.57691	NO	0	0	0	Unknown
84784918	Chondrichthyes	Myliobatidae	Aetomylaeus nichofii	VU	12.8582	28.1874	6.57546	NO	0	0	0	Decreasing
178183	Lepidosaurs	Scincidae	Panaspis annobonensis	CR	5.01274	7.47384	6.5646	YES	0	0	0	Unknown
56646	Amphibians	Craugastoridae	Pristimantis hamiotae	CR	4.79406	7.31442	6.56382	NO	0	0	1	Decreasing
41836	Chondrichthyes	Carcharhinidae	Negaprion acutidens	VU	24.5321	27.8612	6.56289	YES	0	0	0	Decreasing
56303	Amphibians	Eleutherodactylidae	Adelophryne pachydactyla	DD	33.9153	34.9918	6.56258	NO	0	0	1	Unknown
59077	Amphibians	Cryptobranchidae	Cryptobranchus alleganiensis	NT	46.3157	51.2349	6.56244	NO	0	0	1	Decreasing
19018610	Ray-finned fish	Cyprinidae	Alburnus nasreddini	CR	7.73126	7.83372	6.55414	YES	0	0	0	Decreasing
136021	Amphibians	Craugastoridae	Microkayla boettgeri	CR	5.06078	7.49656	6.5485	NO	0	0	0	Decreasing
59369	Amphibians	Plethodontidae	Pseudoeurycea aquatica	CR	3.25614	7.13378	6.54269	NO	0	1	0	Decreasing
41816	Chondrichthyes	Hemigaleidae	Hemigaleus microstoma	VU	26.6355	28.1893	6.53719	YES	0	0	0	Decreasing
176158	Lepidosaurs	Diplodactylidae	Dierogekko nehoueensis	CR	5.06076	7.26355	6.53639	YES	0	0	0	Decreasing
59289	Amphibians	Plethodontidae	Pseudoeurycea lineola	EN	13.3224	13.8177	6.53542	YES	0	0	0	Decreasing
10032	Mammals	Hippopotamidae	Choeropsis liberiensis	EN	5.19654	13.4723	6.53215	YES	0	0	0	Decreasing
NA	Testudines	Pelomedusidae	Pelusios marani	NA	27.7368	27.7368	6.52486	NO	0	0	0	NA
55241	Amphibians	Aromobatidae	Mannophryne caquetio	EN	12.2655	13.8842	6.52366	YES	0	0	0	Decreasing
NA	Lepidosaurs	Lacertidae	Pedioplanis lineoocellata	NA	29.0456	29.0456	6.52277	NO	0	0	0	NA
59365	Amphibians	Plethodontidae	Pseudoeurycea ahuitzotl	CR	3.43493	7.15439	6.51824	YES	0	0	0	Decreasing
109476597	Lepidosaurs	Scincidae	Lerista lineata	EN	14.055	14.2327	6.51809	YES	0	0	0	Unknown
NA	Ray-finned fish	Nemipteridae	Scaevius milii	NA	29.9322	29.9322	6.51621	NO	0	0	0	NA
43114861	Ray-finned fish	Ellopostomatidae	Ellopostoma megalomycter	VU	4.07343	27.9533	6.51306	YES	0	0	0	Decreasing
54408	Amphibians	Arthroleptidae	Cardioglossa pulchra	EN	11.299	13.6293	6.51177	YES	0	0	0	Unknown
229	Ray-finned fish	Acipenseridae	Acipenser stellatus	CR	3.59177	7.08574	6.50928	YES	0	0	1	Decreasing
57196	Amphibians	Leptodactylidae	Paratelmatobius mantiqueira	DD	31.9065	32.9773	6.505	NO	0	0	1	Decreasing
195408	Amphibians	Megophryidae	Megophrys sangzhiensis	CR	5.44106	6.96022	6.50368	NO	0	0	0	Decreasing
NA	Ray-finned fish	Osphronemidae	Parasphaerichthys lineatus	NA	28.1228	29.3308	6.49721	NO	0	0	0	NA
21624	Amphibians	Calyptocephalellidae	Telmatobufo venustus	EN	12.1234	13.4204	6.49634	YES	0	0	0	Unknown
49570767	Amphibians	Microhylidae	Cophyla rava	EN	8.47301	13.6838	6.49416	NO	0	0	0	Decreasing
57676	Amphibians	Microhylidae	Anodonthyla nigrigularis	EN	7.48423	13.5295	6.4936	YES	0	0	0	Decreasing
58379	Amphibians	Micrixalidae	Micrixalus gadgili	EN	9.99254	13.9344	6.48732	NO	0	0	1	Decreasing
22688340	Birds	Musophagidae	Tauraco bannermani	EN	13.5694	13.6705	6.48626	YES	0	0	0	Decreasing
7862	Ray-finned fish	Serranidae	Epinephelus striatus	CR	7.6546	7.65546	6.48572	YES	0	0	0	Decreasing
49981813	Lepidosaurs	Teiidae	Holcosus orcesi	CR	6.42052	6.9819	6.48334	YES	1	1	0	Unknown
57407	Amphibians	Mantellidae	Boophis jaegeri	EN	13.1281	13.3703	6.47726	YES	0	0	0	Decreasing
58062	Amphibians	Pyxicephalidae	Anhydrophryne ngongoniensis	EN	9.91414	13.1585	6.47586	NO	0	0	0	Stable
178262	Lepidosaurs	Sphaerodactylidae	Sphaerodactylus torrei	EN	12.3165	13.7648	6.47329	YES	0	0	0	Stable
2777	Ray-finned fish	Osphronemidae	Betta simplex	CR	6.96943	7.48568	6.47213	YES	0	0	0	Unknown
61860	Amphibians	Pyxicephalidae	Arthroleptella subvoce	CR	6.81256	7.16281	6.47212	YES	0	0	0	Unknown
61817	Amphibians	Craugastoridae	Pristimantis polemistes	CR	5.35931	7.15562	6.47207	YES	0	0	0	Decreasing
161455	Chondrichthyes	Pentanchidae	Cephalurus cephalus	LC	25.7713	28.3403	6.46932	NO	0	0	0	Stable
123423266	Ray-finned fish	Brachionichthyidae	Sympterichthys moultoni	EN	4.73428	13.3788	6.46673	YES	0	0	0	Decreasing
161555	Chondrichthyes	Rhinobatidae	Acroteriobatus leucospilus	EN	8.69592	12.95	6.46609	NO	0	0	0	Decreasing
58438	Amphibians	Dicroglossidae	Quasipaa shini	EN	12.737	13.3464	6.46165	YES	0	0	0	Decreasing
58687	Amphibians	Ranidae	Lithobates omiltemanus	EN	13.5284	13.8153	6.45712	YES	0	0	0	Stable
57668	Amphibians	Microhylidae	Choerophryne siegfriedi	CR	5.36401	7.17796	6.4554	NO	0	0	0	Decreasing
54530	Amphibians	Bufonidae	Atelopus muisca	CR	2.4172	7.20589	6.45481	YES	0	0	0	Decreasing
4968	Testudines	Emydidae	Clemmys guttata	EN	13.051	13.0563	6.44874	YES	0	0	1	Decreasing
197293	Ray-finned fish	Galaxiidae	Galaxias gollumoides	CR	6.59926	6.62034	6.44832	YES	0	0	0	Decreasing
16393900	Lepidosaurs	Scincidae	Melanoseps emmrichi	EN	9.33262	13.0527	6.44743	YES	0	0	0	Unknown
123357268	Ray-finned fish	Melanotaeniidae	Rhadinocentrus ornatus	VU	33.8182	33.8182	6.4435	YES	0	0	0	Decreasing
62290750	Birds	Charadriidae	Charadrius obscurus	CR	6.68075	7.04631	6.44192	YES	0	0	0	Decreasing
NA	Ray-finned fish	Anoplopomatidae	Anoplopoma fimbria	NA	12.5562	22.1583	6.44177	NO	0	0	0	NA
55342	Amphibians	Hemiphractidae	Gastrotheca litonedis	EN	12.9053	13.4908	6.43993	YES	0	0	0	Decreasing
75605387	Lepidosaurs	Sphaerodactylidae	Sphaerodactylus cryphius	EN	12.5658	13.6544	6.43899	YES	0	0	0	Decreasing
NA	Ray-finned fish	Mugilidae	Plicomugil labiosus	NA	30.6567	30.9539	6.43793	NO	0	0	0	NA
79075338	Amphibians	Salamandridae	Cynops fudingensis	CR	6.62737	6.99848	6.4307	YES	0	0	0	Decreasing
161059718	Ray-finned fish	Eleotridae	Mogurnda maccuneae	CR	6.48586	7.07918	6.42901	YES	0	0	0	Decreasing
14505	Ray-finned fish	Galaxiidae	Neochanna burrowsius	CR	5.95086	6.9748	6.42825	YES	0	0	0	Decreasing
136055	Amphibians	Microhylidae	Anodonthyla moramora	EN	7.54104	13.6451	6.42772	YES	0	0	0	Decreasing
56397	Amphibians	Eleutherodactylidae	Eleutherodactylus adelus	EN	10.2642	14.3986	6.42633	YES	0	0	1	Decreasing
54423	Amphibians	Arthroleptidae	Astylosternus ranoides	EN	10.0658	13.0395	6.42425	NO	0	0	0	Decreasing
8187	Lepidosaurs	Scincidae	Eulamprus leuraensis	EN	13.183	13.282	6.4205	YES	0	0	0	Decreasing
17064	Ray-finned fish	Cyprinidae	Chrosomus cumberlandensis	EN	12.9964	13.0486	6.41766	YES	0	0	0	Decreasing
50009685	Lepidosaurs	Teiidae	Pholidoscelis atratus	CR	5.18126	7.04643	6.41596	YES	0	0	0	Decreasing
NA	Lepidosaurs	Scincidae	Sphenomorphus apalpebratus	NA	33.3519	33.891	6.41578	NO	0	0	0	NA
NA	Ray-finned fish	Leiognathidae	Karalla daura	NA	24.4787	25.6831	6.41546	NO	0	0	0	NA
NA	Ray-finned fish	Rivulidae	Laimosemion breviceps	NA	31.8904	36.8083	6.41325	NO	0	0	0	NA
58863	Amphibians	Rhacophoridae	Pseudophilautus limbus	EN	10.143	13.7508	6.41073	NO	0	0	0	Decreasing
172860	Lepidosaurs	Pseudoxyrhophiidae	Pseudoxyrhopus ankafinaensis	CR	5.67951	7.16083	6.40601	YES	1	1	0	Unknown
57061	Amphibians	Craugastoridae	Pristimantis xylochobates	CR	4.39187	7.13933	6.40189	NO	0	0	0	Unknown
54500	Amphibians	Bufonidae	Atelopus chrysocorallus	CR	2.84634	6.96218	6.39175	YES	0	0	0	Decreasing
64293	Lepidosaurs	Boidae	Exiliboa placata	VU	27.0217	27.2816	6.39165	YES	0	0	1	Decreasing
54951	Amphibians	Centrolenidae	Vitreorana castroviejoi	EN	11.8349	12.8331	6.39109	YES	0	0	0	Stable
56978	Amphibians	Craugastoridae	Pristimantis stenodiscus	CR	4.77407	6.82672	6.38701	YES	1	0	0	Decreasing
14902	Ray-finned fish	Ictaluridae	Noturus gilberti	EN	13.2039	13.2652	6.38687	YES	0	0	0	Unknown
99941632	Lepidosaurs	Agamidae	Pseudocalotes flavigula	CR	4.99448	6.96721	6.38338	YES	0	0	0	Stable
59493	Amphibians	Typhlonectidae	Atretochoana eiselti	DD	31.8977	32.4484	6.38046	NO	0	0	1	Unknown
48442971	Lepidosaurs	Phyllodactylidae	Phyllodactylus sentosus	CR	5.91441	7.15999	6.37889	YES	0	0	0	Decreasing
22682447	Birds	Bucerotidae	Anthracoceros montani	CR	5.89671	6.98757	6.3784	YES	0	0	0	Decreasing
59399	Amphibians	Plethodontidae	Pseudoeurycea teotepec	CR	3.42183	7.04183	6.37824	YES	1	1	0	Decreasing
51061021	Amphibians	Plethodontidae	Nototriton picucha	CR	6.68125	7.00468	6.37427	YES	0	0	0	Decreasing
125200559	Amphibians	Aromobatidae	Anomaloglossus dewynteri	CR	4.87594	6.89	6.37406	NO	0	0	0	Decreasing
NA	Amphibians	Nyctibatrachidae	Nyctibatrachus anamallaiensis	NA	24.5543	28.2561	6.3623	NO	0	0	0	NA
176303	Lepidosaurs	Chamaeleonidae	Calumma gallus	EN	13.4217	13.4368	6.3607	YES	0	0	0	Decreasing
202257	Ray-finned fish	Catostomidae	Moxostoma robustum	EN	12.9724	12.9724	6.35726	YES	0	0	0	Unknown
59402	Amphibians	Plethodontidae	Pseudoeurycea werleri	EN	9.79927	13.4012	6.35544	YES	0	0	0	Unknown
172829	Lepidosaurs	Gekkonidae	Phelsuma seippi	EN	13.2774	13.2793	6.35539	YES	0	0	0	Unknown
195008	Amphibians	Eleutherodactylidae	Eleutherodactylus diplasius	EN	7.08953	12.859	6.35382	YES	0	0	0	Unknown
1117	Ray-finned fish	Goodeidae	Ameca splendens	CR	6.498	6.4982	6.34776	YES	0	0	0	Decreasing
NA	Lepidosaurs	Gekkonidae	Lygodactylus thomensis	NA	30.6698	31.2343	6.33827	NO	0	0	0	NA
55108	Amphibians	Aromobatidae	Allobates mandelorum	EN	9.92872	13.8143	6.33519	YES	0	0	0	Unknown
NA	Ray-finned fish	Cyprinidae	Danio feegradei	NA	34.6336	36.7036	6.3327	NO	0	0	0	NA
57067	Amphibians	Craugastoridae	Oreobates zongoensis	CR	5.17797	7.04696	6.33058	NO	0	0	0	Decreasing
NA	Lepidosaurs	Gekkonidae	Chondrodactylus bibronii	NA	23.0001	24.5327	6.32978	NO	0	0	0	NA
NA	Ray-finned fish	Salangidae	Neosalangichthys ishikawae	NA	24.8073	24.8073	6.32845	NO	0	0	0	NA
NA	Ray-finned fish	Gempylidae	Neoepinnula orientalis	NA	22.5458	24.6415	6.32507	NO	0	0	0	NA
172954	Lepidosaurs	Gekkonidae	Matoatoa brevipes	VU	16.6679	26.9803	6.32376	YES	0	0	0	Decreasing
NA	Ray-finned fish	Belonidae	Pseudotylosurus microps	NA	21.846	25.0339	6.31729	NO	0	0	0	NA
NA	Chondrichthyes	Carcharhinidae	Glyphis fowlerae	NA	1.70185	28.1972	6.31294	NO	0	0	0	NA
11533	Testudines	Cheloniidae	Lepidochelys kempii	CR	3.47957	6.88421	6.31165	YES	0	0	0	Unknown
57032	Amphibians	Craugastoridae	Pristimantis veletis	CR	5.04129	6.95857	6.31157	YES	0	0	0	Decreasing
172798	Lepidosaurs	Chamaeleonidae	Calumma furcifer	EN	13.2509	13.3083	6.30949	YES	0	0	0	Decreasing
22678646	Birds	Megapodiidae	Leipoa ocellata	VU	26.4729	26.4729	6.30806	YES	0	0	0	Decreasing
NA	Ray-finned fish	Belonidae	Pseudotylosurus angusticeps	NA	21.846	24.882	6.30753	NO	0	0	0	NA
57203	Amphibians	Craugastoridae	Niceforonia brunnea	EN	12.2305	13.7833	6.30605	NO	0	0	0	Decreasing
8807	Ray-finned fish	Galaxiidae	Galaxias parvus	VU	27.1374	27.2831	6.30602	YES	0	0	0	Unknown
741	Mammals	Cricetidae	Neomicroxus latebricola	EN	12.564	12.9513	6.30503	YES	0	0	0	Decreasing
59317	Amphibians	Plethodontidae	Oedipina maritima	CR	6.62831	6.97722	6.30383	YES	0	0	0	Decreasing
NA	Ray-finned fish	Lotidae	Molva molva	NA	25.0616	25.2721	6.3017	NO	0	0	0	NA
104680864	Lepidosaurs	Dibamidae	Dibamus somsaki	DD	19.5385	25.6979	6.29672	NO	0	0	0	Unknown
NA	Ray-finned fish	Leiognathidae	Karalla dussumieri	NA	24.4787	25.6573	6.29615	NO	0	0	0	NA
161652	Chondrichthyes	Pentanchidae	Holohalaelurus favus	EN	8.92834	12.8123	6.29324	NO	0	0	0	Decreasing
84543703	Birds	Alaudidae	Heteromirafra archeri	CR	3.92123	6.91289	6.29011	YES	0	0	0	Decreasing
39414	Chondrichthyes	Dasyatidae	Fontitrygon ukpam	EN	6.6214	13.0888	6.28958	NO	0	0	0	Decreasing
17764	Ray-finned fish	Atherinopsidae	Poblana letholepis	CR	1.66801	7.01261	6.28701	YES	0	0	0	Unknown
49570548	Amphibians	Mantellidae	Mantidactylus paidroa	EN	12.5753	12.7791	6.27692	YES	0	0	0	Decreasing
58784	Amphibians	Rhacophoridae	Buergeria oxycephala	VU	26.2775	26.9507	6.26682	YES	0	0	0	Decreasing
54468	Amphibians	Bufonidae	Ansonia guibei	CR	6.36618	6.87351	6.26386	YES	0	0	0	Decreasing
56512	Amphibians	Craugastoridae	Pristimantis chrysops	CR	4.66265	6.77766	6.25029	NO	0	0	0	Decreasing
197292	Ray-finned fish	Galaxiidae	Galaxias eldoni	CR	4.81155	6.64106	6.24934	YES	0	0	0	Decreasing
NA	Ray-finned fish	Scophthalmidae	Lepidorhombus whiffiagonis	NA	19.4258	22.6539	6.24757	NO	0	0	0	NA
22728459	Birds	Aegothelidae	Aegotheles tatei	DD	24.7646	27.6921	6.24698	NO	0	0	0	Unknown
57787	Amphibians	Microhylidae	Cophixalus sphagnicola	EN	8.97536	12.9972	6.2449	NO	0	0	0	Decreasing
59496	Amphibians	Herpelidae	Boulengerula denhardti	DD	20.7391	26.2067	6.24453	NO	0	0	0	Unknown
NA	Testudines	Podocnemididae	Podocnemis vogli	NA	26.1224	26.4077	6.2415	NO	0	0	0	NA
75605218	Lepidosaurs	Phyllodactylidae	Phyllodactylus sommeri	CR	5.70186	6.9325	6.24099	NO	0	0	0	Unknown
56529	Amphibians	Craugastoridae	Pristimantis cremnobates	EN	9.17852	12.4703	6.23925	NO	0	0	1	Decreasing
55102	Amphibians	Dendrobatidae	Colostethus latinasus	CR	5.97512	6.90887	6.23845	YES	0	0	0	Decreasing
NA	Lepidosaurs	Gymnophthalmidae	Alexandresaurus camacan	NA	25.6021	25.6021	6.23801	NO	0	0	0	NA
NA	Ray-finned fish	Scophthalmidae	Scophthalmus rhombus	NA	22.2557	23.264	6.23664	NO	0	0	0	NA
41740	Chondrichthyes	Centrophoridae	Centrophorus harrissoni	EN	11.4814	13.438	6.23425	NO	0	0	0	Decreasing
59400	Amphibians	Plethodontidae	Pseudoeurycea tlahcuiloh	CR	3.38605	6.73661	6.23273	YES	0	0	0	Decreasing
57925	Amphibians	Microhylidae	Oreophryne monticola	EN	7.55853	13.1039	6.22925	NO	0	0	0	Decreasing
16854228	Amphibians	Arthroleptidae	Cardioglossa manengouba	CR	3.00349	6.94866	6.2279	YES	0	0	0	Decreasing
22682517	Birds	Bucerotidae	Rhabdotorrhinus waldeni	CR	4.41324	6.92201	6.22132	YES	0	0	0	Decreasing
196298	Ray-finned fish	Mastacembelidae	Macrognathus pentophthalmos	CR	6.64237	7.06694	6.2159	YES	0	1	0	Decreasing
77187242	Amphibians	Aromobatidae	Allobates ignotus	EN	7.26665	12.7936	6.21147	YES	0	0	0	Decreasing
82462705	Amphibians	Bufonidae	Bufo tuberospinius	CR	6.59845	6.79795	6.21003	YES	0	0	0	Decreasing
NA	Chondrichthyes	Rhinobatidae	Rhinobatos spinosus	NA	7.84571	29.9155	6.2084	NO	0	0	0	NA
79101750	Amphibians	Rhacophoridae	Pseudophilautus karunarathnai	CR	4.47139	6.73367	6.2049	NO	0	0	0	Decreasing
187245	Ray-finned fish	Rivulidae	Austrolebias viarius	EN	10.2174	12.0865	6.20302	YES	0	0	0	Unknown
61545710	Amphibians	Plethodontidae	Cryptotriton nasalis	EN	9.60999	12.5698	6.20238	YES	0	0	0	Unknown
172837	Lepidosaurs	Gekkonidae	Lygodactylus bivittis	VU	27.2179	27.5973	6.20167	YES	0	0	0	Decreasing
8111	Ray-finned fish	Percidae	Etheostoma cinereum	VU	26.6986	26.6986	6.1991	YES	0	0	0	Unknown
NA	Ray-finned fish	Mugilidae	Sicamugil cascasia	NA	29.7779	29.9535	6.19425	NO	0	0	0	NA
188654	Ray-finned fish	Percidae	Gymnocephalus ambriaelacus	CR	5.78912	6.96432	6.1933	YES	0	0	1	Decreasing
49563555	Amphibians	Mantellidae	Gephyromantis mafy	CR	4.13903	6.90444	6.19311	YES	0	0	0	Decreasing
NA	Ray-finned fish	Rivulidae	Laimosemion kirovskyi	NA	39.014	40.5753	6.19149	NO	0	0	0	NA
69119609	Amphibians	Hyperoliidae	Hyperolius davenporti	CR	5.774	6.9228	6.18958	NO	0	0	0	Decreasing
18599	Ray-finned fish	Acipenseridae	Pseudoscaphirhynchus fedtschenkoi	CR	1.64085	6.80103	6.18864	YES	0	1	1	Unknown
69119695	Amphibians	Hyperoliidae	Hyperolius ruvuensis	CR	6.10323	6.78509	6.18816	NO	0	0	0	Decreasing
NA	Ray-finned fish	Drepaneidae	Drepane punctata	NA	34.8913	34.8913	6.18717	NO	0	0	0	NA
53858806	Ray-finned fish	Rivulidae	Laimosemion gransabanae	VU	21.8932	27.4409	6.18566	YES	0	0	0	Unknown
17762	Ray-finned fish	Atherinopsidae	Poblana alchichica	CR	0.385121	6.9209	6.18447	YES	0	0	0	Decreasing
NA	Ray-finned fish	Sillaginidae	Sillago robusta	NA	25.5427	34.6279	6.18255	NO	0	0	0	NA
58664	Amphibians	Ranidae	Lithobates miadis	CR	5.71075	6.78448	6.18162	YES	0	0	0	Stable
6985	Mammals	Echimyidae	Callistomys pictus	EN	12.663	12.6902	6.18087	YES	0	0	0	Decreasing
NA	Ray-finned fish	Sillaginidae	Sillago ingenuua	NA	29.9409	33.8534	6.17967	NO	0	0	0	NA
61923	Amphibians	Indotyphlidae	Indotyphlus maharashtraensis	DD	16.6739	24.5325	6.17611	NO	0	0	1	Unknown
178207	Lepidosaurs	Scincidae	Scelotes inornatus	CR	5.54831	6.72404	6.17598	YES	0	0	0	Decreasing
22678795	Birds	Odontophoridae	Ptilopachus nahani	VU	25.9019	25.9019	6.17135	YES	0	0	0	Decreasing
57198	Amphibians	Craugastoridae	Niceforonia adenobrachia	EN	8.41121	12.6194	6.168	NO	0	0	0	Decreasing
NA	Ray-finned fish	Anoplopomatidae	Erilepis zonifer	NA	12.5562	23.2385	6.16779	NO	0	0	0	NA
NA	Lepidosaurs	Scincidae	Eurylepis taeniolata	NA	8.71032	27.6127	6.16472	NO	0	0	0	NA
77342583	Amphibians	Aromobatidae	Aromobates cannatellai	CR	4.05894	6.7732	6.16442	YES	0	0	0	Stable
91309244	Ray-finned fish	Osphronemidae	Betta channoides	EN	11.2882	12.9602	6.16178	YES	0	0	0	Decreasing
59549	Amphibians	Indotyphlidae	Gegeneophis carnosus	DD	26.4302	27.9373	6.16172	NO	0	0	1	Unknown
56578	Amphibians	Eleutherodactylidae	Eleutherodactylus emiliae	EN	11.6837	13.2224	6.15981	YES	0	0	1	Decreasing
91311819	Ray-finned fish	Osphronemidae	Parosphromenus filamentosus	EN	9.96654	12.6671	6.15918	YES	0	0	0	Unknown
17765	Ray-finned fish	Atherinopsidae	Poblana squamata	CR	0.385121	6.95036	6.15915	YES	0	0	0	Decreasing
169819	Lepidosaurs	Scincidae	Sphenomorphus diwata	DD	27.3461	27.4375	6.15152	NO	0	0	1	Unknown
60113	Chondrichthyes	Gymnuridae	Gymnura zonura	EN	16.1575	26.4718	6.15053	NO	0	0	0	Decreasing
12124	Testudines	Trionychidae	Lissemys scutata	DD	27.2163	27.4848	6.14781	NO	0	0	0	Stable
51061249	Amphibians	Plethodontidae	Oedipina taylori	EN	9.23709	12.7845	6.14283	YES	0	0	0	Unknown
60633	Ray-finned fish	Cyprinidae	Acanthobrama centisquama	CR	5.56157	6.68742	6.14069	YES	0	1	0	Unknown
19383549	Ray-finned fish	Cyprinidae	Luciobarbus subquincunciatus	CR	4.29563	6.72963	6.13953	YES	0	0	0	Decreasing
91310746	Ray-finned fish	Osphronemidae	Betta simorum	VU	15.9004	25.1811	6.13569	YES	0	0	0	Decreasing
56093	Amphibians	Hyperoliidae	Chrysobatrachus cupreonitens	EN	8.72125	12.59	6.13562	NO	0	0	0	Decreasing
59568	Amphibians	Indotyphlidae	Indotyphlus battersbyi	DD	16.6739	24.3205	6.13068	NO	0	0	1	Unknown
10241	Testudines	Testudinidae	Chersobius signatus	EN	11.6529	12.7761	6.12429	YES	0	0	0	Decreasing
135598	Ray-finned fish	Cyprinidae	Alburnus mandrensis	CR	6.29158	6.87041	6.1204	YES	0	0	1	Unknown
41747	Chondrichthyes	Somniosidae	Centroscymnus coelolepis	NT	52.5914	52.5914	6.12034	NO	0	0	0	Decreasing
203171	Lepidosaurs	Sphaerodactylidae	Aristelliger reyesi	CR	5.57985	6.79048	6.11894	YES	0	0	0	Decreasing
112716154	Amphibians	Bufonidae	Capensibufo rosei	CR	5.40214	6.65798	6.1187	NO	0	0	0	Unknown
18600	Ray-finned fish	Acipenseridae	Pseudoscaphirhynchus hermanni	CR	0.471469	6.7125	6.11689	YES	0	0	1	Decreasing
102656174	Lepidosaurs	Scincidae	Scincella huanrenensis	CR	4.95783	6.81904	6.11568	YES	0	0	0	Decreasing
57326	Amphibians	Telmatobiidae	Telmatobius bolivianus	CR	4.97961	6.81382	6.1148	YES	0	1	0	Decreasing
NA	Ray-finned fish	Sillaginidae	Sillaginopodys chondropus	NA	19.6337	28.4387	6.11282	NO	0	0	0	NA
18601	Ray-finned fish	Acipenseridae	Pseudoscaphirhynchus kaufmanni	CR	0.471469	6.68536	6.11253	YES	0	0	1	Decreasing
99942442	Lepidosaurs	Dibamidae	Dibamus ingeri	DD	18.5644	25.1761	6.11146	NO	0	0	0	Unknown
8110	Ray-finned fish	Percidae	Etheostoma boschungi	EN	11.2833	12.9706	6.11018	YES	0	0	0	Decreasing
4696	Testudines	Trionychidae	Chitra indica	EN	5.85338	12.094	6.10895	YES	0	0	1	NA
59446	Amphibians	Salamandridae	Echinotriton andersoni	EN	9.88655	13.1359	6.10856	YES	0	0	0	Decreasing
22698320	Birds	Diomedeidae	Phoebastria irrorata	CR	6.54506	6.80905	6.10481	YES	0	0	0	Decreasing
59552	Amphibians	Indotyphlidae	Gegeneophis krishni	DD	28.3993	29.7571	6.10398	NO	0	0	1	Unknown
NA	Ray-finned fish	Cepolidae	Cepola schlegelii	NA	41.137	41.137	6.10298	NO	0	0	0	NA
54536	Amphibians	Bufonidae	Atelopus pachydermus	CR	2.95875	6.75007	6.10292	YES	0	1	0	Decreasing
61914	Amphibians	Salamandridae	Lyciasalamandra atifi	EN	12.3523	12.3954	6.10032	YES	0	0	1	Stable
135886	Amphibians	Centrolenidae	Nymphargus mixomaculatus	CR	5.29312	6.85034	6.09998	NO	0	0	0	Unknown
91310650	Ray-finned fish	Osphronemidae	Betta rutilans	CR	6.00031	6.9847	6.09389	YES	0	0	0	Unknown
107654052	Ray-finned fish	Cyprinidae	Pseudobarbus afer	EN	11.9138	12.9631	6.09303	YES	0	0	0	Decreasing
79101728	Amphibians	Rhacophoridae	Pseudophilautus dayawansai	CR	3.69124	6.96105	6.09175	NO	0	0	0	Decreasing
22682931	Birds	Brachypteraciidae	Brachypteracias leptosomus	VU	25.3369	25.3475	6.09108	YES	0	0	0	Decreasing
161566	Chondrichthyes	Dasyatidae	Maculabatis gerrardi	EN	25.5242	25.6686	6.0902	NO	0	0	0	Decreasing
59382	Amphibians	Plethodontidae	Pseudoeurycea juarezi	EN	0.753235	12.6875	6.08561	YES	0	0	0	Decreasing
57439	Amphibians	Mantellidae	Mantella bernhardi	VU	25.6	25.6	6.08182	YES	0	0	0	Decreasing
51146806	Amphibians	Plethodontidae	Oedipina petiola	CR	3.96597	6.58693	6.08016	YES	0	1	0	Decreasing
109474872	Lepidosaurs	Scincidae	Lerista ameles	EN	12.832	12.9252	6.07286	YES	0	0	0	Decreasing
1846	Ray-finned fish	Cyprinodontidae	Aphanius iberus	EN	6.33541	12.5118	6.07184	YES	0	0	1	Decreasing
56692	Amphibians	Craugastoridae	Pristimantis kelephus	CR	4.78437	6.82432	6.06815	NO	0	0	0	Decreasing
166996	Ray-finned fish	Psettodidae	Psettodes erumei	NA	20.2514	23.3814	6.06691	NO	0	0	0	Unknown
60200	Chondrichthyes	Mobulidae	Mobula thurstoni	EN	9.83009	12.3526	6.06553	YES	0	0	0	Decreasing
NA	Lepidosaurs	Hoplocercidae	Hoplocercus spinosus	NA	24.3029	24.3029	6.06456	NO	0	0	0	NA
5529	Mammals	Cricetidae	Cricetus cricetus	CR	6.79747	6.83221	6.06185	YES	0	0	0	Decreasing
8109	Ray-finned fish	Percidae	Etheostoma australe	EN	12.8944	12.8964	6.06123	YES	0	0	0	Decreasing
NA	Ray-finned fish	Sphyraenidae	Sphyraena helleri	NA	30.3942	30.3943	6.06015	NO	0	0	0	NA
44979651	Lepidosaurs	Elapoidea	Buhoma procterae	VU	22.1394	26.1337	6.0507	YES	0	0	0	Unknown
91315790	Ray-finned fish	Osphronemidae	Parosphromenus phoenicurus	CR	3.8035	6.55871	6.05012	YES	0	0	0	Unknown
181957	Ray-finned fish	Nothobranchiidae	Aphyosemion fulgens	EN	9.94269	12.3668	6.04668	YES	0	0	1	Unknown
195475	Chondrichthyes	Rhinidae	Rhynchobatus palpebratus	NT	6.30472	47.79	6.04297	NO	0	0	0	Decreasing
56877	Amphibians	Eleutherodactylidae	Eleutherodactylus probolaeus	EN	12.5982	12.8568	6.04287	YES	0	0	1	Decreasing
178611	Lepidosaurs	Sphaerodactylidae	Sphaerodactylus thompsoni	EN	11.6024	12.6621	6.04145	YES	0	0	0	Unknown
22700827	Birds	Tyrannidae	Calyptura cristata	CR	6.16578	6.51671	6.03762	YES	0	0	0	Decreasing
NA	Chondrichthyes	Glaucostegidae	Glaucostegus petiti	NA	7.80983	28.4614	6.0364	NO	0	0	0	NA
NA	Ray-finned fish	Sphyraenidae	Sphyraena acutipinnis	NA	20.7262	23.7817	6.03483	NO	0	0	0	NA
165727	Ray-finned fish	Chaetodontidae	Amphichaetodon melbae	NA	21.4396	22.0528	6.03344	NO	0	0	1	Unknown
55170	Amphibians	Dendrobatidae	Andinobates abditus	CR	4.95998	6.48291	6.03178	NO	0	1	0	Decreasing
58359	Amphibians	Dicroglossidae	Limnonectes microtympanum	EN	12.1157	13.02	6.02963	YES	0	0	0	Decreasing
176294	Lepidosaurs	Chamaeleonidae	Brookesia bekolosy	EN	7.93653	12.5666	6.02944	YES	0	0	0	Decreasing
199760	Lepidosaurs	Gekkonidae	Paroedura sanctijohannis	EN	11.7568	12.6331	6.02502	YES	0	0	0	Unknown
54422	Amphibians	Arthroleptidae	Astylosternus perreti	EN	9.7846	12.1074	6.02501	NO	0	0	0	Decreasing
55399	Amphibians	Hylidae	Myersiohyla aromatica	VU	10.0709	25.9712	6.02354	NO	0	0	0	Unknown
NA	Ray-finned fish	Triportheidae	Agoniates halecinus	NA	21.1708	24.0953	6.02294	NO	0	0	0	NA
22696007	Birds	Accipitridae	Harpyopsis novaeguineae	VU	25.6072	25.6644	6.02279	YES	0	0	0	Decreasing
16673	Mammals	Cricetidae	Peromyscus mayensis	CR	6.46798	6.58526	6.02152	YES	0	0	0	Decreasing
59425	Amphibians	Plethodontidae	Thorius pulmonaris	CR	5.72733	6.6108	6.02121	YES	0	0	0	Decreasing
60111	Chondrichthyes	Plesiobatidae	Plesiobatis daviesi	LC	116.027	116.027	6.01725	NO	0	0	0	Unknown
59142	Amphibians	Plethodontidae	Bolitoglossa capitana	CR	4.83081	6.51136	6.01686	YES	0	0	0	Decreasing
54418	Amphibians	Arthroleptidae	Astylosternus laurenti	EN	9.88548	12.4002	6.00928	NO	0	0	0	Decreasing
NA	Ray-finned fish	Cichlidae	Satanoperca acuticeps	NA	30.3866	30.3866	6.00806	NO	0	0	0	NA
44577293	Lepidosaurs	Dactyloidae	Anolis calimae	VU	17.4133	26.5637	6.00462	NO	0	0	0	Unknown
74855790	Lepidosaurs	Amphisbaenidae	Amphisbaena gonavensis	CR	4.9623	6.5222	6.00377	YES	0	0	0	Decreasing
57349	Amphibians	Telmatobiidae	Telmatobius marmoratus	EN	8.67532	12.5184	6.00143	YES	0	0	0	Decreasing
182717	Ray-finned fish	Cyprinidae	Enteromius bagbwensis	CR	6.62368	6.77713	5.99928	YES	0	0	0	Unknown
56300	Amphibians	Eleutherodactylidae	Adelophryne baturitensis	VU	20.8705	25.9367	5.9971	YES	0	0	1	Decreasing
202682	Ray-finned fish	Ictaluridae	Noturus crypticus	CR	5.70169	6.21539	5.9964	YES	0	0	0	Unknown
135503	Ray-finned fish	Cyprinidae	Alburnus vistonicus	CR	6.0353	7.1637	5.9956	YES	0	0	1	Unknown
NA	Lepidosaurs	Gymnophthalmidae	Leposoma baturitensis	NA	25.3521	25.3645	5.99341	NO	0	0	0	NA
6313	Mammals	Nesomyidae	Delanymys brooksi	VU	27.3258	27.8401	5.99251	YES	0	0	0	Decreasing
181673	Ray-finned fish	Nothobranchiidae	Fundulopanchax cinnamomeus	EN	13.7031	14.1515	5.99183	YES	0	0	1	Unknown
56886	Amphibians	Craugastoridae	Pristimantis pugnax	CR	4.84238	6.68062	5.99096	YES	0	0	0	Decreasing
49381365	Amphibians	Mantellidae	Boophis arcanus	EN	9.06528	12.4431	5.98895	YES	0	0	0	Decreasing
39360	Chondrichthyes	Triakidae	Scylliogaleus quecketti	VU	18.5368	27.7393	5.9867	NO	0	0	0	Decreasing
60112	Chondrichthyes	Platyrhinidae	Platyrhinoidis triseriata	LC	103.992	105.61	5.98624	NO	0	0	0	Unknown
21816	Amphibians	Cycloramphidae	Thoropa lutzi	EN	10.898	12.5331	5.98592	NO	0	0	1	Decreasing
197286	Ray-finned fish	Galaxiidae	Galaxias anomalus	CR	2.94997	6.48305	5.98013	YES	0	0	0	Decreasing
57401	Amphibians	Mantellidae	Boophis feonnyala	EN	9.06528	12.4142	5.97688	YES	0	0	0	Unknown
161321	Chondrichthyes	Squalidae	Cirrhigaleus australis	DD	15.6989	24.3831	5.97674	NO	0	0	0	Unknown
136176	Amphibians	Microhylidae	Paradoxophyla tiarano	DD	22.4769	24.5364	5.97341	NO	0	0	0	Decreasing
56423	Amphibians	Craugastoridae	Pristimantis anotis	CR	5.226	6.47827	5.97308	YES	0	1	0	Decreasing
56834	Amphibians	Eleutherodactylidae	Eleutherodactylus patriciae	EN	7.98198	12.405	5.97011	YES	0	0	1	Decreasing
59158	Amphibians	Plethodontidae	Bolitoglossa engelhardti	EN	12.2976	12.7351	5.96724	YES	0	0	0	Decreasing
103730380	Birds	Callaeidae	Callaeas cinereus	CR	5.17987	6.4753	5.96635	YES	0	1	0	Decreasing
91315810	Ray-finned fish	Osphronemidae	Parosphromenus quindecim	CR	2.90875	6.74299	5.96436	YES	0	0	0	Unknown
58834	Amphibians	Rhacophoridae	Pseudophilautus decoris	CR	3.71333	6.49805	5.96324	YES	0	0	0	Decreasing
56753	Amphibians	Craugastoridae	Craugastor megalotympanum	EN	7.70478	12.4348	5.96198	NO	0	0	0	Decreasing
22696116	Birds	Accipitridae	Polemaetus bellicosus	EN	12.277	12.277	5.95652	YES	0	0	0	Decreasing
14907	Ray-finned fish	Ictaluridae	Noturus taylori	EN	13.0587	13.0587	5.95472	YES	0	0	0	Decreasing
55335	Amphibians	Hemiphractidae	Gastrotheca galeata	DD	24.9	25.1291	5.9545	NO	0	0	0	Unknown
107649522	Ray-finned fish	Cyprinidae	Pseudobarbus phlegethon	EN	11.9138	12.9666	5.95322	YES	0	0	0	Decreasing
44218	Chondrichthyes	Pentanchidae	Apristurus macrorhynchus	LC	21.8504	30.5373	5.94338	NO	0	0	0	Stable
NA	Ray-finned fish	Triacanthidae	Trixiphichthys weberi	NA	30.4317	30.4322	5.9411	NO	0	0	0	NA
58544	Amphibians	Ranidae	Odorrana anlungensis	EN	11.9027	12.5342	5.93848	YES	0	0	0	Decreasing
56754	Amphibians	Eleutherodactylidae	Eleutherodactylus melacara	EN	8.07559	12.4659	5.93783	YES	0	0	1	Decreasing
191773	Ray-finned fish	Poeciliidae	Xenodexia ctenolepis	NA	18.6303	27.7	5.93582	NO	0	0	0	Unknown
2111	Ray-finned fish	Ariidae	Neoarius taylori	CR	4.53668	6.82447	5.93552	YES	0	0	0	Decreasing
15457	Ray-finned fish	Cichlidae	Oreochromis esculentus	CR	4.24214	6.57293	5.93326	YES	0	0	1	Decreasing
48100370	Amphibians	Rhacophoridae	Theloderma nebulosum	EN	10.8403	12.0936	5.93213	YES	0	0	0	Decreasing
18475	Ray-finned fish	Cyprinidae	Pseudobarbus quathlambae	EN	7.65214	12.592	5.93201	YES	0	0	0	Decreasing
NA	Ray-finned fish	Zeniontidae	Capromimus abbreviatus	NA	22.1142	25.7271	5.93071	NO	0	0	0	NA
56890	Amphibians	Craugastoridae	Pristimantis pycnodermis	EN	10.0352	12.5294	5.93043	NO	0	0	1	Decreasing
54488	Amphibians	Bufonidae	Atelopus angelito	CR	2.37742	6.62602	5.92555	NO	0	1	0	Decreasing
91311009	Ray-finned fish	Osphronemidae	Betta uberis	VU	18.7566	24.8704	5.92325	YES	0	0	0	Decreasing
161634	Chondrichthyes	Pristiophoridae	Pristiophorus japonicus	LC	23.461	28.1119	5.92321	NO	0	0	0	Stable
197298	Ray-finned fish	Galaxiidae	Galaxias pullus	CR	2.94997	6.54182	5.9098	YES	0	0	0	Decreasing
47151835	Amphibians	Megophryidae	Leptobrachium xanthops	EN	12.2824	12.4247	5.90967	YES	0	0	0	Decreasing
NA	Amphibians	Ranixalidae	Walkerana diplosticta	NA	19.6476	28.9176	5.90718	NO	0	0	0	NA
29470	Amphibians	Eleutherodactylidae	Eleutherodactylus tonyi	CR	3.30328	6.43396	5.90685	YES	0	0	1	Decreasing
59006	Amphibians	Rhacophoridae	Rhacophorus monticola	VU	25.4707	25.6891	5.90557	YES	0	0	0	Decreasing
19479	Ray-finned fish	Bedotiidae	Rheocles lateralis	CR	2.03858	6.42853	5.89861	YES	0	0	0	Decreasing
56776	Amphibians	Eleutherodactylidae	Eleutherodactylus montanus	EN	8.04883	12.5064	5.89646	YES	0	0	1	Decreasing
10825	Testudines	Testudinidae	Indotestudo forstenii	EN	9.24918	11.9916	5.89639	YES	0	0	0	Decreasing
44653	Chondrichthyes	Etmopteridae	Aculeola nigra	NT	29.1529	29.1628	5.89606	NO	0	0	0	Decreasing
6624	Ray-finned fish	Cyprinidae	Tampichthys dichromus	CR	7.06826	7.06836	5.89531	YES	0	0	0	Decreasing
NA	Ray-finned fish	Oreosomatidae	Allocyttus folletti	NA	26.8693	26.8693	5.89405	NO	0	0	0	NA
101950282	Lepidosaurs	Gekkonidae	Hemiphyllodactylus titiwangsaensis	EN	12.2954	13.101	5.88732	YES	0	0	0	Unknown
56708	Amphibians	Eleutherodactylidae	Eleutherodactylus leberi	EN	7.91954	12.2939	5.88717	YES	0	0	1	Decreasing
61427	Lepidosaurs	Colubridae	Lycognathophis seychellensis	EN	9.94996	11.6619	5.88574	YES	0	0	0	Decreasing
91177727	Ray-finned fish	Gyrinocheilidae	Gyrinocheilus pustulosus	NA	22.9767	23.1005	5.88499	NO	0	0	0	Unknown
91311316	Ray-finned fish	Osphronemidae	Luciocephalus aura	EN	11.4677	12.8038	5.88093	YES	0	0	0	Unknown
NA	Lepidosaurs	Scincidae	Sphenomorphus variegatus	NA	24.1887	24.6616	5.87704	NO	0	0	0	NA
57056	Amphibians	Eleutherodactylidae	Eleutherodactylus wightmanae	EN	12.0391	12.1617	5.8764	YES	0	0	0	Decreasing
176149	Lepidosaurs	Scincidae	Nannoscincus manautei	CR	6.06972	6.56288	5.87254	YES	0	0	0	Decreasing
NA	Ray-finned fish	Triportheidae	Agoniates anchovia	NA	21.1708	24.2166	5.87173	NO	0	0	0	NA
57981	Amphibians	Brevicipitidae	Probreviceps rhodesianus	EN	7.55587	12.081	5.86879	YES	0	0	0	Decreasing
60308	Ray-finned fish	Nothobranchiidae	Nothobranchius korthausae	EN	11.3113	12.9789	5.8687	YES	0	0	0	Unknown
55065	Amphibians	Dendrobatidae	Hyloxalus cevallosi	EN	7.03439	11.9383	5.86849	NO	0	0	1	Decreasing
196432	Ray-finned fish	Rhyacichthyidae	Protogobius attiti	EN	6.14413	11.9962	5.86783	YES	0	0	0	Unknown
109452204	Lepidosaurs	Scincidae	Concinnia frerei	VU	24.2512	24.2575	5.8633	YES	0	0	0	Unknown
NA	Amphibians	Rhacophoridae	Beddomixalus bijui	NA	33.3252	34.3947	5.85917	NO	0	0	0	NA
109465196	Lepidosaurs	Scincidae	Cyclodomorphus praealtus	EN	12.2776	12.335	5.85777	YES	0	0	0	Decreasing
22694103	Birds	Glareolidae	Rhinoptilus bitorquatus	CR	5.76256	6.63336	5.85566	YES	0	0	0	Decreasing
16947	Lepidosaurs	Gekkonidae	Phelsuma standingi	VU	25.0876	25.1348	5.85495	YES	0	0	1	Unknown
22693185	Birds	Scolopacidae	Numenius tenuirostris	CR	5.39046	6.53139	5.84878	YES	0	0	0	Decreasing
66390759	Amphibians	Microhylidae	Stumpffia miery	EN	8.50905	12.0816	5.84593	NO	0	0	0	Decreasing
121369896	Amphibians	Plethodontidae	Isthmura corrugata	CR	3.45276	6.53892	5.84301	YES	0	0	0	Unknown
203193	Lepidosaurs	Anomalepididae	Anomalepis mexicanus	DD	15.5858	23.2568	5.84213	NO	0	0	0	Unknown
NA	Ray-finned fish	Sillaginidae	Sillaginodes punctatus	NA	19.5457	29.0119	5.83838	NO	0	0	0	NA
NA	Lepidosaurs	Dactyloidae	Anolis fowleri	NA	16.3792	20.6799	5.83486	NO	0	0	0	NA
18107	Mammals	Potoroidae	Potorous gilbertii	CR	5.81662	6.43317	5.83271	YES	0	0	0	Decreasing
44571	Chondrichthyes	Squatinidae	Squatina armata	CR	28.7766	29.2727	5.83129	NO	0	0	0	Decreasing
49583046	Amphibians	Microhylidae	Stumpffia be	EN	10.6589	12.1745	5.8302	NO	0	0	0	Decreasing
NA	Ray-finned fish	Eleotridae	Butis koilomatodon	NA	33.0568	33.0568	5.82485	NO	0	0	0	NA
58914	Amphibians	Rhacophoridae	Raorchestes munnarensis	CR	5.89041	6.34911	5.82236	YES	0	0	1	Decreasing
159222	Amphibians	Bufonidae	Pelophryne murudensis	CR	5.48177	6.35644	5.81925	NO	0	0	0	Decreasing
172629	Lepidosaurs	Scincidae	Dasia subcaerulea	EN	11.7103	12.1297	5.81892	YES	0	0	1	Unknown
57413	Amphibians	Mantellidae	Boophis mandraka	DD	21.2534	26.7048	5.81854	NO	0	0	0	Decreasing
41795	Chondrichthyes	Squalidae	Cirrhigaleus barbifer	LC	15.6989	25.0621	5.81666	NO	0	0	0	Stable
19482	Ray-finned fish	Bedotiidae	Rheocles wrightae	EN	9.52523	11.0319	5.81566	YES	0	0	0	Decreasing
77345748	Amphibians	Plethodontidae	Bolitoglossa chucantiensis	CR	5.06292	6.50383	5.8121	NO	0	0	0	Decreasing
172552	Lepidosaurs	Chamaeleonidae	Kinyongia tenuis	EN	10.2189	12.3594	5.80948	YES	0	0	0	Unknown
55446	Amphibians	Hylidae	Hyloscirtus chlorosteus	CR	5.08022	6.51845	5.80921	NO	0	1	0	Decreasing
161431	Chondrichthyes	Dasyatidae	Urogymnus granulatus	VU	15.8236	25.2533	5.80908	NO	0	0	0	Decreasing
56467	Amphibians	Craugastoridae	Pristimantis boconoensis	VU	12.0678	24.7527	5.8061	YES	0	0	0	Stable
21902	Lepidosaurs	Scincidae	Tiliqua adelaidensis	EN	12.3214	12.5859	5.80375	YES	0	0	0	Decreasing
58573	Amphibians	Ranidae	Rana chevronta	CR	5.56537	6.29242	5.8031	NO	0	1	0	Unknown
203808	Lepidosaurs	Amphisbaenidae	Cynisca gansi	CR	4.62187	6.48893	5.80298	YES	1	1	0	Unknown
74855383	Lepidosaurs	Amphisbaenidae	Amphisbaena cayemite	CR	4.39267	6.35742	5.80191	YES	0	0	0	Unknown
99942500	Lepidosaurs	Dibamidae	Dibamus vorisi	DD	19.5885	26.1663	5.80065	NO	0	0	0	Unknown
58830	Amphibians	Rhacophoridae	Raorchestes charius	EN	8.63321	12.4889	5.79865	YES	0	0	1	Decreasing
22724568	Birds	Pachycephalidae	Coracornis sanghirensis	CR	6.2331	6.56205	5.79829	YES	0	0	0	Decreasing
NA	Testudines	Emydidae	Deirochelys reticularia	NA	26.4331	26.4331	5.79551	NO	0	0	0	NA
NA	Ray-finned fish	Mugilidae	Liza klunzingeri	NA	23.8356	25.8319	5.79352	NO	0	0	0	NA
58475	Amphibians	Ceratobatrachidae	Cornufer parkeri	EN	9.09429	11.9037	5.78856	NO	0	0	0	Unknown
58654	Amphibians	Ranidae	Chalcorana macrops	VU	18.475	24.0263	5.7849	NO	0	0	0	Decreasing
58885	Amphibians	Rhacophoridae	Pseudophilautus papillosus	CR	2.63894	6.50157	5.78379	YES	0	0	0	Unknown
NA	Ray-finned fish	Drepaneidae	Drepane longimana	NA	31.0217	31.0646	5.78296	NO	0	0	0	NA
22712603	Birds	Pycnonotidae	Pycnonotus zeylanicus	CR	6.25023	6.4201	5.78192	YES	0	0	0	Decreasing
58334	Amphibians	Dicroglossidae	Limnonectes fragilis	VU	24.2917	26.0526	5.78024	NO	0	0	0	Decreasing
61256	Ray-finned fish	Cyprinidae	Pelasgus epiroticus	CR	3.12119	6.60132	5.77244	YES	0	0	1	Unknown
17837	Ray-finned fish	Poeciliidae	Poeciliopsis monacha	EN	12.0374	12.2569	5.7724	YES	0	0	0	Unknown
41813	Chondrichthyes	Triakidae	Gogolia filewoodi	DD	19.9629	24.154	5.76769	NO	0	0	0	Unknown
135965	Amphibians	Craugastoridae	Craugastor cyanochthebius	EN	7.61829	12.1537	5.7657	NO	0	0	0	Decreasing
172538	Lepidosaurs	Chamaeleonidae	Kinyongia magomberae	EN	10.2009	12.3923	5.76285	YES	0	0	0	Unknown
NA	Ray-finned fish	Belonidae	Strongylura incisa	NA	27.9309	28.1793	5.76039	NO	0	0	0	NA
64372	Lepidosaurs	Xenosauridae	Xenosaurus phalaroanthereon	DD	18.6374	24.4524	5.75413	NO	0	0	1	Stable
NA	Lepidosaurs	Xenosauridae	Xenosaurus rackhami	NA	18.1899	24.6657	5.75341	NO	0	0	0	NA
41030	Ray-finned fish	Syngnathidae	Syngnathus watermeyeri	CR	6.19358	6.41937	5.75256	YES	0	0	0	Decreasing
177544	Lepidosaurs	Dibamidae	Dibamus smithi	DD	18.792	24.1882	5.74201	NO	0	0	0	Unknown
55924	Amphibians	Hylidae	Ololygon alcatraz	CR	4.82917	6.35794	5.73981	NO	0	0	1	Decreasing
154032280	Amphibians	Craugastoridae	Craugastor blairi	EN	8.34803	11.8202	5.73936	NO	0	0	0	Decreasing
61884	Amphibians	Rhacophoridae	Pseudophilautus mooreorum	CR	4.59989	6.32013	5.73853	YES	0	0	0	Decreasing
55278	Amphibians	Hemisotidae	Hemisus brachydactylus	DD	22.0248	24.4885	5.73822	NO	1	0	0	Unknown
61896	Amphibians	Plethodontidae	Bolitoglossa copia	CR	4.15867	6.23589	5.73779	NO	0	0	0	Unknown
14856	Testudines	Geoemydidae	Notochelys platynota	VU	24.7261	24.7989	5.73705	YES	0	0	0	Decreasing
18908	Ray-finned fish	Cyprinidae	Systomus martenstyni	EN	7.98773	11.544	5.73693	YES	0	0	0	Decreasing
57204	Amphibians	Microhylidae	Ctenophryne carpish	EN	9.53066	12.0337	5.73192	NO	0	0	0	Decreasing
NA	Crocodylians	Crocodylidae	Mecistops leptorhynchus	NA	9.07772	25.6069	5.73117	NO	0	0	0	NA
4051	Ray-finned fish	Catostomidae	Catostomus warnerensis	EN	12.7655	12.7655	5.73091	YES	0	0	0	Unknown
23155	Ray-finned fish	Poeciliidae	Xiphophorus clemenciae	NA	30.5695	30.5695	5.7278	NO	0	0	0	Unknown
125554212	Lepidosaurs	Gekkonidae	Cyrtodactylus gialaiensis	CR	5.06601	6.44192	5.72724	NO	0	0	0	Unknown
135847	Amphibians	Hemiphractidae	Gastrotheca pulchra	DD	21.5639	34.6867	5.72628	NO	0	0	1	Unknown
NA	Lepidosaurs	Dibamidae	Dibamus taylori	NA	19.0178	25.8302	5.72119	NO	0	0	0	NA
NA	Ray-finned fish	Scophthalmidae	Lepidorhombus boscii	NA	19.4258	22.7096	5.71969	NO	0	0	0	NA
55309	Amphibians	Hylidae	Duellmanohyla lythrodes	EN	7.36737	11.6657	5.71716	NO	0	0	0	Decreasing
176198	Lepidosaurs	Scincidae	Emoia loyaltiensis	VU	23.7223	24.5782	5.71365	YES	0	0	0	Decreasing
NA	Lepidosaurs	Xenosauridae	Xenosaurus mendozai	NA	17.9128	24.6188	5.71235	NO	0	0	0	NA
201414	Amphibians	Craugastoridae	Craugastor galacticorhinus	EN	6.86457	11.7268	5.70885	NO	0	0	0	Unknown
55546	Amphibians	Hylidae	Hyloscirtus lynchi	CR	5.0261	6.29148	5.70827	NO	0	0	0	Decreasing
NA	Lepidosaurs	Dibamidae	Dibamus tebal	NA	19.2474	24.8519	5.70629	NO	0	0	0	NA
22678453	Birds	Cracidae	Oreophasis derbianus	EN	11.7927	11.796	5.70625	YES	0	0	0	Decreasing
NA	Ray-finned fish	Acestrorhynchidae	Acestrorhynchus heterolepis	NA	32.857	32.857	5.70274	NO	0	0	0	NA
19378341	Amphibians	Phrynobatrachidae	Phrynobatrachus kakamikro	DD	28.3699	32.0672	5.70139	NO	0	0	0	Unknown
22692971	Birds	Mesitornithidae	Monias benschi	VU	21.0347	24.1643	5.70036	YES	0	0	0	Decreasing
42689609	Lepidosaurs	Chamaeleonidae	Calumma vohibola	EN	12.1816	12.2186	5.69589	YES	0	0	0	Decreasing
56553	Amphibians	Craugastoridae	Pristimantis deinops	CR	4.65859	6.31526	5.69503	NO	0	0	0	Decreasing
15575	Ray-finned fish	Adrianichthyidae	Oryzias matanensis	NT	31.9393	46.1201	5.68844	NO	0	0	0	Unknown
50950734	Lepidosaurs	Tropiduridae	Stenocercus varius	EN	11.582	12.4579	5.68563	YES	0	0	0	Unknown
60206	Chondrichthyes	Triakidae	Mustelus sinusmexicanus	LC	21.7029	32.3469	5.68263	NO	0	0	0	Increasing
16124	Ray-finned fish	Ambassidae	Parambassis altipinnis	CR	5.67326	6.15062	5.68085	YES	0	0	0	Unknown
162293947	Chondrichthyes	Centrophoridae	Centrophorus granulosus	EN	18.116	27.1433	5.68051	NO	0	0	0	Decreasing
59308	Amphibians	Plethodontidae	Oedipina carablanca	EN	10.9262	11.8749	5.6753	YES	0	0	0	Decreasing
56445	Amphibians	Craugastoridae	Craugastor azueroensis	EN	7.28513	11.4097	5.67459	NO	0	0	0	Decreasing
61455	Lepidosaurs	Lacertidae	Acanthodactylus blanci	EN	10.6946	11.5065	5.67388	YES	0	0	1	Decreasing
236	Ray-finned fish	Acipenseridae	Acipenser sinensis	CR	5.77822	5.91195	5.67359	YES	0	0	1	Decreasing
15839	Ray-finned fish	Aplocheilidae	Pachypanchax sakaramyi	EN	4.82891	11.6416	5.67071	YES	0	0	0	Decreasing
195456	Chondrichthyes	Dasyatidae	Himantura leoparda	VU	24.2095	24.5837	5.6694	NO	0	0	0	Decreasing
55161	Amphibians	Aromobatidae	Allobates undulatus	VU	9.15114	24.4871	5.66913	NO	0	0	0	Unknown
193488	Lepidosaurs	Gekkonidae	Phelsuma roesleri	EN	12.1623	12.2277	5.66718	YES	0	0	0	Unknown
19483	Testudines	Chelidae	Rheodytes leukops	VU	23.9372	24.6077	5.66606	YES	0	0	1	NA
59389	Amphibians	Plethodontidae	Isthmura naucampatepetl	CR	2.46253	6.37772	5.66232	NO	0	0	0	Decreasing
56944	Amphibians	Brachycephalidae	Ischnocnema sambaqui	DD	25.423	28.6162	5.66013	NO	0	0	1	Unknown
161062238	Ray-finned fish	Eleotridae	Oxyeleotris altipinna	EN	8.86085	11.4483	5.65857	YES	0	0	0	Unknown
56631	Amphibians	Craugastoridae	Craugastor greggi	EN	6.94988	11.57	5.65449	NO	0	0	0	Decreasing
40714	Ray-finned fish	Heptapteridae	Phreatobius cisternarum	NA	15.8207	21.4912	5.65396	NO	0	0	1	NA
2781	Ray-finned fish	Osphronemidae	Betta chini	EN	10.0291	11.6467	5.65257	YES	0	0	0	Unknown
15939	Ray-finned fish	Gobiidae	Pandaka pygmaea	CR	5.31193	6.24604	5.64896	YES	0	0	0	Unknown
58514	Amphibians	Ptychadenidae	Ptychadena newtoni	EN	11.2022	12.0187	5.64873	YES	0	0	0	Decreasing
101950777	Lepidosaurs	Gekkonidae	Gekko rhacophorus	DD	34.601	35.1214	5.64865	NO	0	0	0	Unknown
75976903	Lepidosaurs	Chamaeleonidae	Kinyongia mulyai	CR	4.9088	6.26898	5.64683	YES	0	0	0	Decreasing
197044	Ray-finned fish	Mugilidae	Parachelon grandisquamis	NA	32.3759	32.3759	5.64642	NO	0	0	0	Unknown
55307	Amphibians	Hylidae	Duellmanohyla chamulae	EN	6.28899	11.4017	5.64595	YES	0	0	0	Decreasing
17824	Testudines	Podocnemididae	Podocnemis sextuberculata	VU	23.1333	23.6934	5.63866	YES	0	0	1	NA
57050	Amphibians	Craugastoridae	Craugastor vulcani	EN	7.53943	11.7516	5.63602	NO	0	0	0	Decreasing
NA	Amphibians	Ranixalidae	Walkerana leptodactyla	NA	19.2755	28.9614	5.63549	NO	0	0	0	NA
41823	Chondrichthyes	Hexanchidae	Heptranchias perlo	NT	42.9808	45.3327	5.63541	NO	0	0	0	Decreasing
56088	Amphibians	Hyperoliidae	Alexteroon jynx	CR	5.77778	6.30104	5.63465	NO	0	0	0	Decreasing
5670	Crocodylians	Crocodylidae	Crocodylus rhombifer	CR	6.13399	6.22461	5.63291	YES	0	0	1	NA
58084	Amphibians	Petropedetidae	Petropedetes perreti	CR	4.20306	6.23567	5.62482	YES	0	0	0	Decreasing
NA	Lepidosaurs	Gymnophthalmidae	Marinussaurus curupira	NA	26.5807	26.6457	5.62284	NO	0	0	0	NA
63141	Chondrichthyes	Oxynotidae	Oxynotus centrina	VU	19.1569	24.654	5.62045	NO	0	0	0	Decreasing
60215	Chondrichthyes	Somniosidae	Zameus squamulosus	LC	11.7709	25.3347	5.62011	NO	0	0	0	Stable
91310403	Ray-finned fish	Osphronemidae	Betta patoti	EN	13.3679	13.3794	5.61958	YES	0	0	0	Unknown
181722	Ray-finned fish	Cyprinidae	Enteromius boboi	CR	6.35548	6.44915	5.61653	YES	0	0	0	Unknown
48101780	Amphibians	Megophryidae	Megophrys damrei	CR	4.45832	6.05123	5.60842	NO	0	0	0	Decreasing
56948	Amphibians	Craugastoridae	Craugastor montanus	EN	6.72201	11.8942	5.6055	NO	0	0	0	Decreasing
158610	Amphibians	Bufonidae	Melanophryniscus langonei	CR	4.64656	6.20825	5.60472	NO	0	0	1	Unknown
180136	Ray-finned fish	Sillaginidae	Sillago argentifasciata	NA	22.3401	26.3078	5.6045	NO	0	0	1	Unknown
78520054	Amphibians	Megophryidae	Megophrys obesa	CR	4.69396	6.18615	5.6036	NO	0	0	0	Decreasing
NA	Testudines	Pelomedusidae	Pelusios sinuatus	NA	25.3294	25.3294	5.60254	NO	0	0	0	NA
82466746	Amphibians	Craugastoridae	Craugastor saltator	EN	9.63746	11.6485	5.60229	YES	0	0	0	Unknown
55256	Amphibians	Aromobatidae	Aromobates mayorgai	EN	6.88968	11.5597	5.60213	YES	0	0	0	Decreasing
136036	Amphibians	Microhylidae	Ctenophryne barbatula	EN	9.16478	11.8617	5.6019	NO	0	0	0	Unknown
99941794	Lepidosaurs	Agamidae	Pseudocalotes rhaegal	CR	4.12682	6.09971	5.60142	NO	0	0	0	Unknown
NA	Ray-finned fish	Notacanthidae	Lipogenys gillii	NA	22.7562	22.7569	5.59931	NO	0	0	0	NA
21472	Mammals	Tapiridae	Acrocodia indicus	EN	11.223	11.6753	5.59897	YES	0	0	0	Decreasing
77347607	Amphibians	Plethodontidae	Bolitoglossa meliana	EN	11.7295	12.2405	5.59697	YES	0	0	0	Decreasing
163448	Testudines	Trionychidae	Cycloderma aubryi	VU	16.5166	23.8203	5.59677	YES	0	0	0	Decreasing
56974	Amphibians	Craugastoridae	Pristimantis spilogaster	CR	3.86319	6.03572	5.59539	NO	0	0	0	Decreasing
NA	Lepidosaurs	Xenosauridae	Xenosaurus agrenon	NA	19.3994	25.8652	5.59301	NO	0	0	0	NA
54346	Amphibians	Hylidae	Osteopilus vastus	VU	24.869	24.869	5.59085	NO	0	0	0	Unknown
191696	Ray-finned fish	Goodeidae	Allotoca goslinei	EW	5.17538	8.4042	5.59026	YES	0	0	0	NA
1282	Amphibians	Plethodontidae	Aneides aeneus	NT	45.8028	46.1701	5.58954	NO	0	0	1	Decreasing
55416	Amphibians	Hylidae	Dryophytes bocourti	CR	5.12994	6.17494	5.58867	NO	0	1	0	Decreasing
22686411	Birds	Psittacidae	Amazona imperialis	CR	6.07342	6.11987	5.58775	YES	0	0	0	Decreasing
123423098	Ray-finned fish	Brachionichthyidae	Brachiopsilus ziebelli	CR	3.83196	6.10031	5.58676	YES	0	0	0	Decreasing
NA	Lepidosaurs	Gerrhosauridae	Matobosaurus validus	NA	15.0817	22.9785	5.57959	NO	0	0	0	NA
149846458	Ray-finned fish	Cyprinidae	Systomus timbiri	CR	6.08374	7.08674	5.5775	YES	0	0	0	Decreasing
56733	Amphibians	Eleutherodactylidae	Eleutherodactylus luteolus	EN	11.4801	11.8475	5.57585	YES	0	0	0	Decreasing
59462	Amphibians	Salamandridae	Pleurodeles poireti	EN	9.6787	11.4517	5.5757	YES	0	0	0	Decreasing
NA	Lepidosaurs	Agamidae	Saara hardwickii	NA	23.3302	23.832	5.57552	NO	0	0	0	NA
176288	Amphibians	Petropedetidae	Petropedetes euskircheni	EN	10.6456	11.4425	5.57505	YES	0	0	0	Decreasing
84500429	Amphibians	Mantellidae	Aglyptodactylus australis	EN	10.3153	11.5472	5.57299	NO	0	0	0	Decreasing
NA	Amphibians	Ranidae	Amolops indoburmanensis	NA	26.3812	28.6866	5.57078	NO	0	0	0	NA
13146	Ray-finned fish	Atherinopsidae	Menidia extensa	VU	29.222	29.222	5.56802	YES	0	0	0	Stable
NA	Ray-finned fish	Heptapteridae	Phreatobius dracunculus	NA	14.3826	21.3731	5.56038	NO	0	0	0	NA
59397	Amphibians	Plethodontidae	Pseudoeurycea smithi	CR	4.37762	6.10815	5.5599	YES	0	0	0	Decreasing
8375	Amphibians	Alsodidae	Eupsophus insularis	CR	5.56353	6.04569	5.55664	YES	0	0	0	Decreasing
56391	Amphibians	Eleutherodactylidae	Eleutherodactylus acmonis	EN	9.02125	11.3016	5.55391	YES	0	0	1	Decreasing
21112669	Ray-finned fish	Stylephoridae	Stylephorus chordatus	LC	99.8906	99.8906	5.55348	NO	0	0	0	Unknown
91309890	Ray-finned fish	Osphronemidae	Betta foerschi	EN	10.5235	11.285	5.55302	YES	0	0	0	Unknown
6027	Lepidosaurs	Iguanidae	Cyclura collei	CR	5.99394	6.1204	5.5488	YES	0	0	0	Unknown
59388	Amphibians	Plethodontidae	Pseudoeurycea mystax	EN	8.19959	11.7237	5.54785	YES	0	0	0	Decreasing
57369	Amphibians	Telmatobiidae	Telmatobius yuracare	CR	4.36104	6.05998	5.54697	YES	0	0	0	Decreasing
178686	Lepidosaurs	Scincidae	Madascincus nanus	VU	23.5036	24.3915	5.54693	YES	0	0	1	Unknown
125341465	Ray-finned fish	Poeciliidae	Pseudoxiphophorus obliquus	NA	35.7225	37.1211	5.54656	NO	0	0	0	Unknown
170247	Ray-finned fish	Sparidae	Petrus rupestris	EN	12.1615	12.319	5.54353	YES	0	0	1	Decreasing
125200843	Amphibians	Aromobatidae	Anomaloglossus degranvillei	CR	4.96587	6.17362	5.53678	YES	0	0	0	Decreasing
NA	Chondrichthyes	Carcharhinidae	Lamiopsis tephrodes	NA	9.789	23.4771	5.53482	NO	0	0	0	NA
56565	Amphibians	Craugastoridae	Pristimantis dissimulatus	EN	10.8211	11.9911	5.53249	NO	0	0	1	Decreasing
20227	Ray-finned fish	Siluridae	Silurus mento	CR	4.47539	6.08654	5.5323	YES	0	0	1	Unknown
NA	Chondrichthyes	Dasyatidae	Pastinachus stellurostris	NA	21.8485	25.5441	5.52866	NO	0	0	0	NA
NA	Ray-finned fish	Leiognathidae	Gazza squamiventralis	NA	25.1257	25.1273	5.52754	NO	0	0	0	NA
56697	Amphibians	Craugastoridae	Craugastor laevissimus	EN	6.03556	11.3395	5.5249	NO	0	0	0	Decreasing
86466824	Amphibians	Mantellidae	Boophis boppa	EN	10.1277	11.9589	5.52451	NO	0	0	0	Decreasing
NA	Lepidosaurs	Gekkonidae	Phelsuma andamanensis	NA	23.7741	24.2108	5.5225	NO	0	0	0	NA
60791	Ray-finned fish	Cyprinidae	Iberochondrostoma lusitanicum	CR	5.2719	5.91704	5.52237	YES	0	0	1	Decreasing
16236	Ray-finned fish	Cichlidae	Paretroplus maculatus	CR	3.48961	5.99292	5.52227	YES	0	0	0	Decreasing
161615	Chondrichthyes	Dasyatidae	Pateobatis fai	VU	22.4377	24.0489	5.52216	NO	0	0	0	Decreasing
58974	Amphibians	Rhacophoridae	Zhangixalus arvalis	EN	10.1717	11.5069	5.51372	NO	0	0	1	Decreasing
180645	Ray-finned fish	Siluridae	Ceratoglanis pachynema	CR	5.50707	5.97044	5.51223	YES	0	0	0	Decreasing
2621	Ray-finned fish	Gobiidae	Bathygobius burtoni	EN	10.4298	10.8458	5.5093	YES	0	0	0	Unknown
161357	Chondrichthyes	Myliobatidae	Myliobatis tobijei	VU	20.4391	26.4034	5.50088	NO	0	0	0	Decreasing
59027	Amphibians	Rhacophoridae	Ghatixalus variabilis	EN	8.05229	11.4352	5.5004	YES	0	0	1	Stable
161588	Chondrichthyes	Potamotrygonidae	Paratrygon aiereba	DD	26.5363	29.0378	5.49958	NO	0	0	1	Unknown
22721873	Birds	Parulidae	Leucopeza semperi	CR	5.98367	5.98731	5.49784	YES	1	0	0	Unknown
170183	Ray-finned fish	Sparidae	Chrysoblephus cristiceps	CR	6.07666	6.08137	5.49735	YES	0	0	1	Decreasing
172836	Lepidosaurs	Chamaeleonidae	Calumma cucullatum	VU	23.9064	24.0082	5.49654	YES	0	0	0	Decreasing
59628	Amphibians	Ichthyophiidae	Ichthyophis orthoplicatus	EN	10.2924	11.9021	5.49423	NO	0	0	0	Decreasing
57011	Amphibians	Craugastoridae	Pristimantis torrenticola	CR	4.72717	6.04946	5.49319	NO	0	0	0	Decreasing
NA	Chondrichthyes	Mobulidae	Mobula japanica	NA	25.3373	30.8499	5.48624	NO	0	0	0	NA
59554	Amphibians	Indotyphlidae	Gegeneophis seshachari	DD	26.2548	27.7457	5.48471	NO	1	0	1	Unknown
170245	Ray-finned fish	Sparidae	Dentex dentex	VU	26.9387	26.9387	5.48277	YES	0	0	1	Unknown
868	Mammals	Cheirogaleidae	Allocebus trichotis	EN	11.2745	11.2745	5.4787	YES	0	0	0	Decreasing
47006112	Amphibians	Microhylidae	Asterophrys marani	DD	22.7264	24.5203	5.47471	NO	0	0	0	Unknown
520	Amphibians	Limnodynastidae	Adelotus brevis	NT	42.4983	42.5725	5.46089	NO	0	0	1	Decreasing
44513	Ray-finned fish	Cichlidae	Ptychochromoides itasy	CR	1.71222	5.72535	5.46087	YES	0	0	0	Unknown
161598	Chondrichthyes	Dasyatidae	Pateobatis hortlei	VU	22.2363	23.8886	5.45541	NO	0	0	0	Decreasing
22697913	Birds	Procellariidae	Pseudobulweria becki	CR	5.18787	5.95608	5.4521	YES	0	0	0	Decreasing
57289	Amphibians	Leptodactylidae	Pleurodema marmoratum	VU	23.5495	23.5495	5.45203	YES	0	0	0	Decreasing
76338162	Amphibians	Calyptocephalellidae	Telmatobufo ignotus	EN	7.20568	11.335	5.45009	YES	0	0	0	Decreasing
22694053	Birds	Charadriidae	Vanellus gregarius	CR	5.74661	6.05216	5.45003	YES	0	0	0	Decreasing
57971	Amphibians	Microhylidae	Rhombophryne guentherpetersi	EN	7.71566	11.5167	5.44596	NO	0	0	0	Decreasing
203810	Lepidosaurs	Amphisbaenidae	Cynisca kigomensis	CR	4.55848	6.04016	5.44473	YES	0	0	0	Unknown
57355	Amphibians	Telmatobiidae	Telmatobius pinguiculus	EN	6.36698	11.2383	5.44459	NO	0	0	0	Decreasing
56459	Amphibians	Craugastoridae	Pristimantis bernali	CR	4.89274	5.98563	5.44439	NO	0	1	0	Unknown
NA	Amphibians	Rhinatrematidae	Rhinatrema ron	NA	19.1444	25.3664	5.44373	NO	0	0	0	NA
75084777	Lepidosaurs	Dactyloidae	Anolis pigmaequestris	EN	6.75562	11.3179	5.44229	YES	0	0	0	Unknown
[truncated: 68,427 more rows]

## Sheet: Lineage statistics
family	clade	mean.tbl	mean.ed	mean.edge	spp	prop.thr	prop.ass	prop.ds	prop.ds.thr	prop.edge.spp	EDGE.lineage	Thr.no
Lepidogalaxiidae	Ray-finned Fish	172.157	172.157	84.0223	1	1	1	1	1	1	YES	1
Carettochelyidae	Testudines	118.821	118.821	59.4039	1	1	1	1	1	1	YES	1
Xenotyphlopidae	Lepidosaurs	64.9723	64.9723	58.9402	1	1	1	1	1	1	YES	1
Shinisauridae	Lepidosaurs	111.34	111.34	53.8863	1	1	1	1	1	1	YES	1
Dermatemydidae	Testudines	56.1468	56.1468	52.2209	1	1	1	1	1	1	YES	1
Polyodontidae	Ray-finned Fish	63.1	98.0125	50.6933	2	1	1	1	1	1	YES	2
Cetorhinidae	Chondrichthyes	88.4041	88.4087	40.9331	1	1	1	1	1	1	YES	1
Sooglossidae	Amphibians	21.1474	61.1444	40.2724	4	1	1	1	1	1	YES	4
Pristidae	Chondrichthyes	58.4989	71.4736	39.3881	7	0.714286	0.714286	0.714286	1	1	YES	5
Denticipitidae	Ray-finned Fish	153.964	153.964	36.0796	1	1	1	1	1	1	YES	1
Pedionomidae	Birds	39.7058	39.7059	35.952	1	1	1	1	1	1	YES	1
Platysternidae	Testudines	68.0344	68.0344	34.0631	1	1	1	1	1	1	YES	1
Rhinodermatidae	Amphibians	33.9197	56.4057	33.4036	3	1	1	1	1	1	YES	3
Sagittariidae	Birds	65.1109	65.1109	31.0902	1	1	1	1	1	1	YES	1
Gavialidae	Crocodylians	24.7002	31.7079	28.929	1	1	1	1	1	1	YES	1
Rhinidae	Chondrichthyes	15.1924	31.0768	23.8239	9	0.888889	1	1	0.888889	1	NO	8
Strigopidae	Birds	17.0381	34.911	23.7042	3	1	1	1	1	1	YES	3
Strabomantidae	Amphibians	30.3227	31.0056	21.9083	2	1	1	1	1	1	YES	2
Valenciidae	Ray-finned Fish	19.1819	33.6621	21.1642	3	0.666667	0.666667	0.666667	1	1	YES	2
Triodontidae	Ray-finned Fish	80.8207	80.8207	20.4316	1	0	0	0	NA	NA	NO	0
Daubentoniidae	Mammals	41.0943	41.0943	20.1312	1	1	1	1	1	1	YES	1
Nasikabatrachidae	Amphibians	12.5385	59.0688	19.8919	2	0.5	0.5	0.5	1	1	YES	1
Rhynochetidae	Birds	38.1689	40.4163	19.6541	1	1	1	1	1	1	YES	1
Glaucostegidae	Chondrichthyes	8.34281	24.7166	19.4141	7	0.857143	0.857143	0.857143	1	1	YES	6
Stegostomidae	Chondrichthyes	19.3078	39.0785	19.3577	1	0	0	0	NA	NA	NO	0
Rhincodontidae	Chondrichthyes	18.4809	39.2784	19.2062	1	1	1	1	1	1	YES	1
Rhynchobatidae	Chondrichthyes	4.97355	20.521	18.655	1	1	1	1	1	1	YES	1
Podocnemididae	Testudines	37.7138	38.7712	17.8437	8	0.875	0.875	0.875	1	1	YES	7
Zanobatidae	Chondrichthyes	22.4458	77.3066	17.776	2	0	0.5	0	NA	NA	NO	0
Myrmecobiidae	Mammals	33.7307	33.7307	16.4663	1	1	1	1	1	1	YES	1
Megalopidae	Ray-finned Fish	42.9106	64.557	16.1497	2	0.5	0.5	0.5	1	1	YES	1
Bolyeriidae	Lepidosaurs	64.7991	67.6008	15.843	1	1	1	1	1	1	YES	1
Lanthanotidae	Lepidosaurs	66.5282	66.5282	15.8345	1	0	0	0	NA	NA	NO	0
Alopiidae	Chondrichthyes	56.1755	56.7322	15.5081	3	1	1	1	1	0.666667	YES	3
Menidae	Ray-finned Fish	68.4955	68.4955	14.0885	1	0	0	0	NA	NA	NO	0
Amiidae	Ray-finned Fish	251.2	251.2	13.7572	1	0	1	1	0	NA	NO	0
Plecoglossidae	Ray-finned Fish	56.83	56.83	13.5895	1	0	0	0	NA	NA	NO	0
Lamnidae	Chondrichthyes	41.8208	46.173	13.578	5	0.8	1	1	0.8	1	NO	4
Leptobramidae	Ray-finned Fish	72.7792	72.7792	13.3684	1	0	0	0	NA	NA	NO	0
Sphenodontidae	Lepidosaurs	243.038	243.038	13.3554	1	0	1	1	0	NA	NO	0
Lactariidae	Ray-finned Fish	67.9035	67.9035	13.1216	1	0	0	0	NA	NA	NO	0
Atrichornithidae	Birds	17.1482	28.4087	13.0423	2	1	1	1	1	1	YES	2
Leptochariidae	Chondrichthyes	98.9275	98.9275	12.5788	1	0	1	1	0	NA	NO	0
Echinorhinidae	Chondrichthyes	26.003	45.9875	12.4267	2	0.5	1	0.5	1	0	YES	1
Ginglymostomatidae	Chondrichthyes	16.3839	27.3091	12.3747	4	1	1	1	1	0.5	YES	4
Sphyrnidae	Chondrichthyes	26.3765	27.4788	12.3002	10	0.8	0.9	0.8	1	0.5	YES	8
Nematogenyidae	Ray-finned Fish	97.4331	97.4331	12.2921	1	0	0	0	NA	NA	NO	0
Scolecomorphidae	Amphibians	26.1677	49.4827	12.0579	6	0.333333	1	0.666667	0.5	1	NO	2
Balaenicipitidae	Birds	51.5492	51.6447	11.9207	1	1	1	1	1	1	YES	1
Ailuridae	Mammals	23.5443	23.5443	11.5085	1	1	1	1	1	1	YES	1
Mystacinidae	Mammals	3.44862	27.2644	10.9935	2	1	1	1	1	1	YES	2
Solenodontidae	Mammals	3.79134	40.5885	10.8791	2	0.5	1	1	0.5	1	NO	1
Dermochelyidae	Testudines	44.1556	44.3893	10.4419	1	1	1	1	1	1	YES	1
Lipotidae	Mammals	10.6752	10.7206	9.76888	1	1	1	1	1	1	YES	1
Petropedetidae	Amphibians	12.8527	18.2395	9.68812	13	0.692308	1	0.923077	0.75	0.888889	NO	9
Chikilidae	Amphibians	32.3733	47.7101	9.6808	4	0	0.25	0	NA	NA	NO	0
Xenophidiidae	Lepidosaurs	28.2054	44.8992	9.43395	2	0	1	0	NA	NA	NO	0
Rhinophrynidae	Amphibians	162.692	162.692	8.93612	1	0	1	1	0	NA	NO	0
Trichodontidae	Ray-finned Fish	31.5841	34.9998	8.84875	2	0	0	0	NA	NA	NO	0
Manidae	Mammals	4.01372	14.1037	8.65106	8	1	1	1	1	1	YES	8
Hypnidae	Chondrichthyes	150.793	150.793	8.59776	1	0	1	1	0	NA	NO	0
Eleginopsidae	Ray-finned Fish	40.8109	40.8109	8.22469	1	0	0	0	NA	NA	NO	0
Notiomystidae	Birds	34.4349	34.4374	8.20672	1	1	1	1	1	1	YES	1
Hexanchidae	Chondrichthyes	37.3457	42.9196	8.08586	4	0.25	1	1	0.25	1	NO	1
Brachaeluridae	Chondrichthyes	51.8155	63.1362	7.93438	2	0.5	1	1	0.5	1	NO	1
Cheloniidae	Testudines	12.2365	17.3542	7.88216	6	0.833333	1	0.833333	1	1	YES	5
Rhinatrematidae	Amphibians	29.4082	39.1632	7.86208	13	0.230769	0.769231	0.538462	0.428571	1	NO	3
Hexatrygonidae	Chondrichthyes	136.023	136.023	7.77844	1	0	1	1	0	NA	NO	0
Notocheiridae	Ray-finned Fish	39.9326	61.9469	7.58311	1	0	0	0	NA	NA	NO	0
Pholidichthyidae	Ray-finned Fish	2.4036	30.2953	7.4556	2	0	0	0	NA	NA	NO	0
Herpelidae	Amphibians	33.2001	39.7137	7.42692	10	0.4	0.9	0.7	0.571429	1	NO	4
Acanthisittidae	Birds	22.5405	36.8972	7.41845	2	0.5	1	1	0.5	1	NO	1
Conrauidae	Amphibians	23.7113	27.6574	7.36901	6	0.5	1	1	0.5	1	NO	3
Rhineuridae	Lepidosaurs	130.063	130.063	7.32917	1	0	1	1	0	NA	NO	0
Platanistidae	Mammals	15.1366	15.1444	7.3026	1	1	1	1	1	1	YES	1
Aetobatidae	Chondrichthyes	18.7613	27.8316	7.25558	4	1	1	1	1	0.25	YES	4
Polycentridae	Ray-finned Fish	16.625	28.6796	7.2442	3	0	0	0	NA	NA	NO	0
Thylacomyidae	Mammals	29.4072	29.4072	7.18018	1	1	1	1	1	1	YES	1
Phascolarctidae	Mammals	29.1375	29.2592	7.0234	1	1	1	1	1	1	YES	1
Chanidae	Ray-finned Fish	126.3	126.3	7.00248	1	0	1	1	0	NA	NO	0
Ellopostomatidae	Ray-finned Fish	4.07343	21.1691	6.76275	2	1	1	1	1	1	YES	2
Geoemydidae	Testudines	9.46797	13.2424	6.71282	71	0.619718	0.774648	0.774648	0.8	0.772727	NO	44
Leiopelmatidae	Amphibians	17.3773	25.4652	6.62788	4	0.75	1	1	0.75	1	NO	3
Ornithorhynchidae	Mammals	49.6991	51.2378	6.61663	1	0	1	1	0	NA	NO	0
Mitsukurinidae	Chondrichthyes	129.961	129.961	6.57691	1	0	1	1	0	NA	NO	0
Dasyornithidae	Birds	14.6076	21.7548	6.57173	3	0.666667	1	1	0.666667	1	NO	2
Telmatobiidae	Amphibians	6.16885	11.4722	6.38594	63	0.84127	0.984127	0.873016	0.963636	0.603774	NO	53
Tachyglossidae	Mammals	8.98716	16.9956	6.34357	4	0.75	1	1	0.75	1	NO	3
Rhinocerotidae	Mammals	6.94577	11.9141	6.34106	5	0.8	1	1	0.8	1	NO	4
Anoplopomatidae	Ray-finned Fish	12.5562	22.6984	6.30478	2	0	0	0	NA	NA	NO	0
Calyptocephalellidae	Amphibians	17.8338	20.8588	6.23165	5	0.8	1	1	0.8	1	NO	4
Squatinidae	Chondrichthyes	12.7925	16.0664	6.15403	25	0.52	0.88	0.84	0.619048	0.153846	NO	13
Osteoglossidae	Ray-finned Fish	25.0535	27.9951	6.11357	6	0.166667	0.666667	0.666667	0.25	1	NO	1
Hemigaleidae	Chondrichthyes	27.9385	31.1816	6.08237	8	0.625	1	0.875	0.714286	0.6	NO	5
Plesiobatidae	Chondrichthyes	116.027	116.027	6.01725	1	0	1	1	0	NA	NO	0
Trionychidae	Testudines	14.184	16.9414	6.0112	33	0.606061	0.787879	0.757576	0.8	0.6	NO	20
Odontaspididae	Chondrichthyes	14.0431	29.0593	6.00574	4	0.5	0.75	0.75	0.666667	0.5	NO	2
Hippopotamidae	Mammals	5.19654	17.7179	5.87541	2	1	1	1	1	1	YES	2
Myliobatidae	Chondrichthyes	17.5983	23.7488	5.74482	19	0.631579	0.842105	0.789474	0.8	0.166667	NO	12
Galaxiidae	Ray-finned Fish	13.3113	16.1877	5.71463	53	0.641509	0.830189	0.830189	0.772727	0.970588	NO	34
Brevicipitidae	Amphibians	10.1354	13.1696	5.7128	36	0.416667	0.916667	0.888889	0.46875	0.933333	NO	15
Glaucosomatidae	Ray-finned Fish	18.9977	22.1885	5.63571	4	0	0	0	NA	NA	NO	0
Stylephoridae	Ray-finned Fish	99.8906	99.8906	5.55348	1	0	1	1	0	NA	NO	0
Cryptobranchidae	Amphibians	15.9326	24.0241	5.54685	4	0.25	0.75	0.75	0.333333	1	NO	1
Burramyidae	Mammals	13.7401	13.784	5.4913	5	0.2	1	1	0.2	1	NO	1
Bombinatoridae	Amphibians	19.4845	26.0316	5.47141	8	0.25	0.75	0.75	0.333333	1	NO	2
Xenosauridae	Lepidosaurs	16.68	23.1632	5.4378	12	0.25	0.5	0.416667	0.6	1	NO	3
Cathartidae	Birds	24.1561	26.2113	5.40084	7	0.285714	1	1	0.285714	1	NO	2
Citharidae	Ray-finned Fish	32.8104	35.4883	5.38625	6	0	0.333333	0.333333	0	NA	NO	0
Psettodidae	Ray-finned Fish	14.8217	19.8063	5.34481	3	0	0	0	NA	NA	NO	0
Eleutherodactylidae	Amphibians	8.32537	12.0792	5.3392	228	0.631579	0.912281	0.885965	0.712871	0.770833	NO	144
Testudinidae	Testudines	9.91739	13.1975	5.32964	58	0.706897	0.862069	0.844828	0.836735	0.560976	NO	41
Mobulidae	Chondrichthyes	10.905	17.4349	5.29033	11	0.727273	0.727273	0.727273	1	0.375	YES	8
Aegothelidae	Birds	22.0359	23.8645	5.15535	10	0.1	1	0.8	0.125	1	NO	1
Elapoidea	Lepidosaurs	19.3959	23.7375	5.05568	3	0.333333	0.333333	0.333333	1	1	NO	1
Polyprionidae	Ray-finned Fish	5.25568	13.307	5.02676	4	0.25	0.25	0.25	1	1	NO	1
Craseonycteridae	Mammals	38.175	38.175	4.9161	1	0	1	1	0	NA	NO	0
Alligatoridae	Crocodylians	15.5267	18.8717	4.7797	8	0.25	1	1	0.25	0.5	NO	2
Trygonorrhinidae	Chondrichthyes	21.4684	29.8997	4.72729	9	0.333333	0.888889	0.777778	0.428571	0.333333	NO	3
Alytidae	Amphibians	16.8202	17.2258	4.67884	12	0.25	0.916667	0.916667	0.272727	0.666667	NO	3
Dinolestidae	Ray-finned Fish	10.8525	17.4009	4.65874	1	0	0	0	NA	NA	NO	0
Dibamidae	Lepidosaurs	18.0342	23.4938	4.62334	25	0.08	0.68	0.36	0.222222	1	NO	2
Scophthalmidae	Ray-finned Fish	17.4821	21.3176	4.54905	9	0	0.111111	0.111111	0	NA	NO	0
Steatornithidae	Birds	78.6419	78.6419	4.49457	1	0	1	1	0	NA	NO	0
Hypoptychidae	Ray-finned Fish	30.7568	31.726	4.49209	2	0	0.5	0.5	0	NA	NO	0
Drepaneidae	Ray-finned Fish	32.3116	32.3817	4.43451	3	0	0.333333	0.333333	0	NA	NO	0
Proteidae	Amphibians	20.4758	21.3246	4.40231	8	0.25	0.75	0.75	0.333333	0.5	NO	2
Platyrhinidae	Chondrichthyes	28.3951	35.2319	4.40211	5	0.6	0.8	0.8	0.75	0	NO	3
Hominidae	Mammals	1.84575	5.83354	4.40187	7	0.857143	0.857143	0.857143	1	1	YES	6
Centrogenyidae	Ray-finned Fish	7.34775	20.9312	4.38132	1	0	0	0	NA	NA	NO	0
Orycteropodidae	Mammals	77.7265	77.7265	4.30767	1	0	1	1	0	NA	NO	0
Aplodactylidae	Ray-finned Fish	15.7294	17.1728	4.30425	5	0	0	0	NA	NA	NO	0
Leptosomidae	Birds	78.3349	78.3349	4.29215	1	0	1	1	0	NA	NO	0
Heleophrynidae	Amphibians	16.6052	19.583	4.26871	7	0.285714	0.857143	0.857143	0.333333	0.5	NO	2
Luvaridae	Ray-finned Fish	77.8239	77.8239	4.26721	1	0	1	1	0	NA	NO	0
Crocodylidae	Crocodylians	9.78463	14.3834	4.25285	16	0.5625	0.875	0.875	0.642857	0.555556	NO	9
Pseudaspididae	Lepidosaurs	17.8259	25.6891	4.24562	4	0	0.25	0.25	0	NA	NO	0
Mesitornithidae	Birds	12.6217	17.6435	4.21503	3	1	1	1	1	1	YES	3
Chelidae	Testudines	11.0244	13.2438	4.19124	59	0.220339	0.457627	0.423729	0.52	0.461538	NO	13
Carcharhinidae	Chondrichthyes	13.8152	17.3379	4.17169	59	0.559322	0.949153	0.915254	0.611111	0.363636	NO	33
Arapaimidae	Ray-finned Fish	21.959	27.3775	4.16426	5	0	0.2	0.2	0	NA	NO	0
Indotyphlidae	Amphibians	17.0251	19.6207	4.11847	24	0.0833333	0.75	0.333333	0.25	1	NO	2
Eublepharidae	Lepidosaurs	13.837	18.199	4.11655	38	0.289474	0.684211	0.631579	0.458333	0.909091	NO	11
Chironemidae	Ray-finned Fish	14.1658	15.9423	4.04418	6	0	0	0	NA	NA	NO	0
Albulidae	Ray-finned Fish	13.546	20.1832	4.03605	13	0.0769231	0.230769	0.230769	0.333333	1	NO	1
Opisthocomidae	Birds	71.812	71.812	3.96614	1	0	1	1	0	NA	NO	0
Acipenseridae	Ray-finned Fish	3.82802	5.94552	3.95882	25	0.84	1	1	0.84	1	NO	21
Gerrhopilidae	Lepidosaurs	14.4671	18.807	3.95049	21	0	0.571429	0.0952381	0	NA	NO	0
Aniliidae	Lepidosaurs	70.2618	70.279	3.90414	1	0	1	1	0	NA	NO	0
Cyttidae	Ray-finned Fish	28.18	32.5016	3.86783	3	0	0.333333	0.333333	0	NA	NO	0
Nyctibatrachidae	Amphibians	10.6235	12.7029	3.86192	39	0.282051	0.410256	0.333333	0.846154	0.909091	NO	11
Rhyacichthyidae	Ray-finned Fish	6.80585	12.2378	3.83897	3	0.333333	0.333333	0.333333	1	1	NO	1
Goodeidae	Ray-finned Fish	4.88819	7.22233	3.83602	49	0.734694	0.816327	0.816327	0.9	0.972222	NO	36
Helostomatidae	Ray-finned Fish	68.3549	68.3549	3.79428	1	0	1	1	0	NA	NO	0
Aplocheilidae	Ray-finned Fish	11.4105	15.2376	3.77732	14	0.5	0.785714	0.785714	0.636364	1	NO	7
Rhinobatidae	Chondrichthyes	10.1147	16.7133	3.77518	38	0.447368	0.789474	0.605263	0.73913	0.0588235	NO	17
Aromobatidae	Amphibians	8.9345	11.9303	3.72475	125	0.424	0.888	0.696	0.609195	0.54717	NO	53
Zanclidae	Ray-finned Fish	67.3904	67.3904	3.71723	1	0	1	1	0	NA	NO	0
Rostratulidae	Birds	21.1601	24.4083	3.70628	3	0.333333	1	1	0.333333	1	NO	1
Dasyatidae	Chondrichthyes	13.2466	16.609	3.70303	102	0.411765	0.715686	0.617647	0.666667	0.0952381	NO	42
Hynobiidae	Amphibians	10.1811	11.8493	3.65037	81	0.37037	0.62963	0.555556	0.666667	0.566667	NO	30
Phrynobatrachidae	Amphibians	17.3719	20.2413	3.63525	92	0.184783	0.956522	0.684783	0.269841	0.647059	NO	17
Osphronemidae	Ray-finned Fish	11.3659	13.6831	3.58322	133	0.496241	0.736842	0.736842	0.673469	0.969697	NO	66
Parazenidae	Ray-finned Fish	20.8933	25.1212	3.58213	4	0	0.5	0.5	0	NA	NO	0
Anseranatidae	Birds	62.6083	62.6083	3.5819	1	0	1	1	0	NA	NO	0
Bedotiidae	Ray-finned Fish	3.88508	7.51591	3.56952	16	0.8125	0.875	0.875	0.928571	1	NO	13
Anarhichadidae	Ray-finned Fish	13.0113	13.8524	3.56647	5	0	0	0	NA	NA	NO	0
Lateolabracidae	Ray-finned Fish	10.1928	13.7416	3.5549	2	0	0	0	NA	NA	NO	0
Zeniontidae	Ray-finned Fish	12.9189	18.7093	3.5088	7	0	0.142857	0.142857	0	NA	NO	0
Heterodontidae	Chondrichthyes	15.1886	19.3025	3.48789	9	0	1	0.666667	0	NA	NO	0
Gymnuridae	Chondrichthyes	12.4699	19.5041	3.46981	16	0.375	0.75	0.75	0.5	0	NO	6
Allophrynidae	Amphibians	14.641	18.6123	3.4461	3	0	0.333333	0.333333	0	NA	NO	0
Typhlonectidae	Amphibians	20.396	25.0214	3.4448	14	0	0.928571	0.357143	0	NA	NO	0
Pandionidae	Birds	61.2368	61.2368	3.43658	1	0	1	1	0	NA	NO	0
Eurypygidae	Birds	38.1689	60.673	3.42896	1	0	1	1	0	NA	NO	0
Oxynotidae	Chondrichthyes	12.9496	17.1828	3.42877	5	0.4	1	0.8	0.5	0	NO	2
Pityriasidae	Birds	27.0122	27.031	3.41277	1	0	1	1	0	NA	NO	0
Arthroleptidae	Amphibians	10.851	13.835	3.38616	150	0.353333	0.993333	0.826667	0.427419	0.471698	NO	53
Adrianichthyidae	Ray-finned Fish	12.6894	16.9206	3.37524	37	0.189189	0.702703	0.702703	0.269231	0.714286	NO	7
Sphyraenidae	Ray-finned Fish	17.6032	19.4841	3.36525	28	0	0.321429	0.321429	0	NA	NO	0
Brachypteraciidae	Birds	16.6695	16.9909	3.35662	5	0.6	1	1	0.6	1	NO	3
Plethodontidae	Amphibians	8.08198	10.0235	3.35424	477	0.542977	0.924528	0.849057	0.639506	0.521236	NO	259
Centrophoridae	Chondrichthyes	12.1881	17.0256	3.33223	18	0.611111	0.888889	0.777778	0.785714	0	NO	11
Pomatomidae	Ray-finned Fish	7.82008	13.6893	3.32269	1	1	1	1	1	0	YES	1
Rhinopteridae	Chondrichthyes	12.7914	16.2729	3.27996	8	0.375	0.75	0.625	0.6	0	NO	3
Amblyopsidae	Ray-finned Fish	12.8864	13.6014	3.20857	7	0.142857	0.714286	0.714286	0.2	1	NO	1
Pristiophoridae	Chondrichthyes	25.2279	28.6353	3.19744	8	0	1	1	0	NA	NO	0
Pluvianidae	Birds	56.0742	56.0742	3.19375	1	0	1	1	0	NA	NO	0
Dichistiidae	Ray-finned Fish	6.22647	11.1849	3.19208	2	0	0	0	NA	NA	NO	0
Threskiornithidae	Birds	11.8586	13.3323	3.19188	35	0.228571	1	1	0.228571	1	NO	8
Somniosidae	Chondrichthyes	15.213	18.7543	3.187	17	0.235294	0.882353	0.529412	0.444444	0.25	NO	4
Ranixalidae	Amphibians	8.57084	12.9231	3.15376	17	0.176471	0.352941	0.294118	0.6	0	NO	3
Myobatrachidae	Amphibians	11.8979	14.4003	3.15031	86	0.174419	0.906977	0.813953	0.214286	0.533333	NO	15
Hapalogenyidae	Ray-finned Fish	12.5039	15.6902	3.15028	8	0	0	0	NA	NA	NO	0
Eupetidae	Birds	24.9348	25.1719	3.1106	1	0	1	1	0	NA	NO	0
Batrachylidae	Amphibians	10.9306	13.4834	3.0983	12	0.416667	1	0.916667	0.454545	0.4	NO	5
Arripidae	Ray-finned Fish	8.0174	15.5128	3.07305	4	0	0	0	NA	NA	NO	0
Ichthyophiidae	Amphibians	11.9478	16.2345	3.0661	57	0.0701754	0.859649	0.280702	0.25	0	NO	4
Pseudomugilidae	Ray-finned Fish	2.79555	5.9732	3.03496	18	0.5	0.833333	0.833333	0.6	0.333333	NO	9
Anguillidae	Ray-finned Fish	9.96977	10.8478	2.97965	20	0.3	0.6	0.6	0.5	0.833333	NO	6
Fregatidae	Birds	10.4522	11.6446	2.97924	5	0.4	1	1	0.4	1	NO	2
Mantellidae	Amphibians	12.4455	13.7469	2.9224	230	0.404348	0.921739	0.895652	0.451456	0.602151	NO	93
Heliornithidae	Birds	15.0135	16.2506	2.88378	3	0.333333	1	1	0.333333	1	NO	1
Ptilocercidae	Mammals	51.9151	51.9151	2.86549	1	0	1	1	0	NA	NO	0
Normanichthyidae	Ray-finned Fish	7.31403	11.2099	2.8362	1	0	0	0	NA	NA	NO	0
Gasteropelecidae	Ray-finned Fish	12.9245	16.9094	2.82755	9	0	0.111111	0.111111	0	NA	NO	0
Oreosomatidae	Ray-finned Fish	14.6196	15.9567	2.82354	10	0	0.2	0.2	0	NA	NO	0
Scopidae	Birds	51.5492	52.0652	2.80926	1	0	1	1	0	NA	NO	0
Picathartidae	Birds	5.09116	11.923	2.8072	2	1	1	1	1	1	YES	2
Oplegnathidae	Ray-finned Fish	12.5379	13.8935	2.80552	7	0	0	0	NA	NA	NO	0
Retropinnidae	Ray-finned Fish	17.0559	18.5288	2.77367	5	0.2	1	1	0.2	1	NO	1
Anomalepididae	Lepidosaurs	13.6366	17.6272	2.76885	20	0	0.9	0.35	0	NA	NO	0
Micrixalidae	Amphibians	7.44834	10.9502	2.76224	24	0.208333	0.375	0.25	0.833333	0	NO	5
Trogonophidae	Lepidosaurs	17.6366	20.4036	2.76131	6	0	0.666667	0.333333	0	NA	NO	0
Scombropidae	Ray-finned Fish	6.98257	10.8189	2.75242	3	0	0	0	NA	NA	NO	0
Sillaginidae	Ray-finned Fish	11.4608	14.839	2.72957	34	0.0294118	0.176471	0.176471	0.166667	1	NO	1
Parascylliidae	Chondrichthyes	9.59972	15.6839	2.7206	8	0.125	1	0.625	0.2	0	NO	1
Tropidophiidae	Lepidosaurs	5.82445	8.58096	2.71638	34	0.294118	0.588235	0.529412	0.555556	0.8	NO	10
Hemisotidae	Amphibians	20.6496	24.3217	2.71089	9	0	1	0.666667	0	NA	NO	0
Chamaeleonidae	Lepidosaurs	9.68852	10.7299	2.6822	213	0.347418	0.943662	0.896714	0.387435	0.905405	NO	74
Triacanthidae	Ray-finned Fish	9.5163	11.9932	2.67533	7	0	0	0	NA	NA	NO	0
Thalasseleotrididae	Ray-finned Fish	6.87264	10.5996	2.67313	3	0	0	0	NA	NA	NO	0
Aphredoderidae	Ray-finned Fish	49.0211	49.0212	2.65885	1	0	1	1	0	NA	NO	0
Torpedinidae	Chondrichthyes	7.34939	10.8357	2.65766	24	0.125	0.75	0.416667	0.3	0	NO	3
Narcinidae	Chondrichthyes	11.9939	16.3966	2.63477	31	0.290323	0.741935	0.516129	0.5625	0	NO	9
Cycloramphidae	Amphibians	9.52381	13.1406	2.63052	36	0.111111	0.944444	0.388889	0.285714	0.25	NO	4
Triakidae	Chondrichthyes	14.9336	17.4277	2.61945	46	0.413043	0.956522	0.869565	0.475	0.105263	NO	19
Umbridae	Ray-finned Fish	24.5357	29.3659	2.61374	7	0.142857	1	1	0.142857	1	NO	1
Brachionichthyidae	Ray-finned Fish	3.4647	7.09827	2.60886	13	0.461538	0.538462	0.538462	0.857143	0.833333	NO	6
Hemiphractidae	Amphibians	10.1088	12.4137	2.60244	117	0.367521	0.863248	0.683761	0.5375	0.348837	NO	43
Mugilidae	Ray-finned Fish	17.3224	18.3387	2.57171	78	0.0128205	0.461538	0.461538	0.0277778	1	NO	1
Dendrobatidae	Amphibians	7.09338	9.07661	2.54478	197	0.375635	0.944162	0.680203	0.552239	0.283784	NO	74
Dugongidae	Mammals	10.0952	10.7827	2.54279	1	1	1	1	1	1	YES	1
Sphaerodactylidae	Lepidosaurs	10.7632	12.7426	2.54204	224	0.254464	0.857143	0.785714	0.323864	0.859649	NO	57
Elephantidae	Mammals	2.82417	7.9217	2.53742	3	0.666667	0.666667	0.666667	1	1	YES	2
Craugastoridae	Amphibians	6.71014	9.07934	2.50914	846	0.408983	0.875887	0.739953	0.552716	0.16474	NO	346
Leiocephalidae	Lepidosaurs	8.13863	10.6314	2.49876	26	0.269231	0.807692	0.807692	0.333333	0.714286	NO	7
Eleotridae	Ray-finned Fish	7.34616	10.1078	2.49646	179	0.162011	0.564246	0.564246	0.287129	0.862069	NO	29
Leiognathidae	Ray-finned Fish	12.9915	14.3687	2.48967	48	0	0.166667	0.166667	0	NA	NO	0
Pseudotrichonotidae	Ray-finned Fish	4.9553	10.1675	2.48078	4	0	0	0	NA	NA	NO	0
Dalatiidae	Chondrichthyes	22.0404	24.6641	2.46147	9	0.111111	1	1	0.111111	0	NO	1
Physeteridae	Mammals	9.77778	10.3807	2.45594	1	1	1	1	1	1	YES	1
Otididae	Birds	7.66634	9.55751	2.44904	26	0.307692	1	1	0.307692	0.875	NO	8
Belonidae	Ray-finned Fish	13.2981	14.654	2.42046	35	0	0.371429	0.371429	0	NA	NO	0
Rhacophoridae	Amphibians	7.93418	9.72184	2.41108	403	0.315136	0.766749	0.640199	0.492248	0.314961	NO	127
Ereuniidae	Ray-finned Fish	7.25665	10.4483	2.40439	3	0	0	0	NA	NA	NO	0
Cyclopedidae	Mammals	43.181	43.188	2.39676	1	0	1	1	0	NA	NO	0
Bradypodidae	Mammals	6.75986	8.16791	2.38803	4	0.5	1	1	0.5	1	NO	2
Lacantuniidae	Ray-finned Fish	4.56909	10.1278	2.38737	1	1	1	1	1	0	YES	1
Bufonidae	Amphibians	5.12359	7.14367	2.38387	617	0.376013	0.875203	0.768233	0.489451	0.452586	NO	232
Kurtidae	Ray-finned Fish	8.59626	23.7801	2.37761	2	0	0.5	0.5	0	NA	NO	0
Microhylidae	Amphibians	9.85602	12.3175	2.3768	688	0.162791	0.854651	0.670058	0.24295	0.366071	NO	112
Pelomedusidae	Testudines	10.076	11.662	2.36637	27	0.037037	0.259259	0.222222	0.166667	0	NO	1
Anacanthobatidae	Chondrichthyes	9.34036	13.9186	2.36629	24	0	0.916667	0.75	0	NA	NO	0
Salamandridae	Amphibians	7.86896	9.06811	2.33413	122	0.45082	0.811475	0.803279	0.561224	0.4	NO	55
Pelobatidae	Amphibians	12.8596	14.5503	2.32762	6	0.333333	0.666667	0.666667	0.5	0.5	NO	2
Gyrinocheilidae	Ray-finned Fish	12.966	13.9733	2.31934	3	0	0.666667	0.666667	0	NA	NO	0
Diatomyidae	Mammals	41.8784	41.8785	2.31487	1	0	1	1	0	NA	NO	0
Odontobutidae	Ray-finned Fish	9.21468	11.0239	2.31474	23	0.0434783	0.217391	0.217391	0.2	0	NO	1
Sapayoidae	Birds	42.7888	42.7888	2.30352	1	0	1	1	0	NA	NO	0
Pluvianellidae	Birds	18.5555	18.6501	2.30077	1	0	1	1	0	NA	NO	0
Pipidae	Amphibians	16.4064	18.4576	2.29044	41	0.170732	1	0.829268	0.205882	0.857143	NO	7
Callaeidae	Birds	4.54832	7.60174	2.25332	4	0.25	1	1	0.25	1	NO	1
Melanonidae	Ray-finned Fish	13.2393	18.3838	2.24852	2	0	0.5	0.5	0	NA	NO	0
Icosteidae	Ray-finned Fish	3.67533	8.46462	2.23869	1	0	0	0	NA	NA	NO	0
Petauridae	Mammals	4.2837	4.78354	2.23799	12	0.333333	0.916667	0.916667	0.363636	0.5	NO	4
Latidae	Ray-finned Fish	7.90156	10.5042	2.23497	13	0.384615	0.615385	0.615385	0.625	0.6	NO	5
Acestrorhynchidae	Ray-finned Fish	8.71417	10.7587	2.21834	26	0	0.115385	0.115385	0	NA	NO	0
Osmeridae	Ray-finned Fish	10.4337	11.1573	2.2121	15	0.0666667	0.466667	0.466667	0.142857	1	NO	1
Xiphiidae	Ray-finned Fish	39.5745	39.5745	2.21135	1	0	1	1	0	NA	NO	0
Dinopercidae	Ray-finned Fish	13.0703	15.3535	2.20254	2	0	0.5	0.5	0	NA	NO	0
Hylocitreidae	Birds	6.16257	12.2718	2.19174	2	0.5	1	1	0.5	1	NO	1
Lampridae	Ray-finned Fish	36.5755	38.6369	2.17029	2	0	1	1	0	NA	NO	0
Lemuridae	Mammals	1.60369	3.09315	2.16028	21	1	1	1	1	0.666667	YES	21
Hexagrammidae	Ray-finned Fish	7.22168	9.59929	2.15792	12	0	0.166667	0.166667	0	NA	NO	0
Bipedidae	Lepidosaurs	39.1822	39.8691	2.14835	3	0	1	1	0	NA	NO	0
Oceanitidae	Birds	11.6837	13.6669	2.1444	9	0.222222	1	0.777778	0.285714	1	NO	2
Helodermatidae	Lepidosaurs	18.5827	24.5654	2.12903	2	0	1	1	0	NA	NO	0
Aulorhynchidae	Ray-finned Fish	37.396	37.4249	2.12068	1	0	1	1	0	NA	NO	0
Narkidae	Chondrichthyes	8.49859	11.6937	2.1112	12	0.166667	0.916667	0.5	0.333333	0	NO	2
Rhinochimaeridae	Chondrichthyes	14.036	19.032	2.09501	8	0	1	0.875	0	NA	NO	0
Euclichthyidae	Ray-finned Fish	2.39953	7.99867	2.08906	1	0	0	0	NA	NA	NO	0
Loxocemidae	Lepidosaurs	39.5799	39.5799	2.08708	1	0	1	1	0	NA	NO	0
Dulidae	Birds	37.2365	37.2365	2.08696	1	0	1	1	0	NA	NO	0
Urotrygonidae	Chondrichthyes	9.2579	12.598	2.05787	20	0.25	0.85	0.8	0.3125	0	NO	5
Aplodontiidae	Mammals	35.3969	35.3969	2.03492	1	0	1	1	0	NA	NO	0
Cylindrophiidae	Lepidosaurs	7.28239	9.75764	2.02666	14	0	0.285714	0.0714286	0	NA	NO	0
Tapiridae	Mammals	3.60242	4.60997	2.02359	5	0.8	0.8	0.8	1	0.75	YES	4
Rhamphocottidae	Ray-finned Fish	7.01453	12.1048	2.02057	1	0	0	0	NA	NA	NO	0
Grammicolepididae	Ray-finned Fish	37.1034	37.7418	2.01727	3	0	0.666667	0.666667	0	NA	NO	0
Giganturidae	Ray-finned Fish	32.6526	35.3053	2.0037	2	0	1	1	0	NA	NO	0
Tarsipedidae	Mammals	34.7308	34.7308	2.00356	1	0	1	1	0	NA	NO	0
Proscylliidae	Chondrichthyes	10.972	14.5492	1.99873	7	0.142857	0.714286	0.714286	0.2	0	NO	1
Pontoporiidae	Mammals	8.30582	8.53306	1.99787	1	1	1	1	1	1	YES	1
Scyliorhinidae	Chondrichthyes	8.62387	12.0803	1.9945	68	0.132353	0.955882	0.661765	0.2	0	NO	9
Dactyloidae	Lepidosaurs	9.24716	11.2687	1.98801	436	0.119266	0.665138	0.603211	0.197719	0.730769	NO	52
Odobenidae	Mammals	8.39191	8.39191	1.97967	1	1	1	1	1	1	YES	1
Limnodynastidae	Amphibians	10.6655	12.2841	1.96967	43	0.162791	1	0.976744	0.166667	0.857143	NO	7
Percichthyidae	Ray-finned Fish	7.59039	9.03976	1.96621	38	0.263158	0.552632	0.552632	0.47619	0.9	NO	10
Hiodontidae	Ray-finned Fish	28.2198	36.0749	1.95986	2	0	1	1	0	NA	NO	0
Ibidorhynchidae	Birds	34.4582	34.4582	1.95703	1	0	1	1	0	NA	NO	0
Neosebastidae	Ray-finned Fish	10.3536	11.6246	1.95605	18	0	0	0	NA	NA	NO	0
Gerrhosauridae	Lepidosaurs	11.683	13.1681	1.95524	36	0.194444	0.805556	0.777778	0.25	0.714286	NO	7
Ambystomatidae	Amphibians	7.7187	9.49619	1.95168	37	0.405405	1	0.918919	0.441176	0.133333	NO	15
Malacanthidae	Ray-finned Fish	9.51745	10.7632	1.91939	45	0.0222222	0.266667	0.266667	0.0833333	1	NO	1
Ephippidae	Ray-finned Fish	10.6852	12.9856	1.91538	15	0	0.466667	0.466667	0	NA	NO	0
Megapodiidae	Birds	7.83624	8.33358	1.91093	21	0.52381	1	1	0.52381	0.818182	NO	11
Stromateidae	Ray-finned Fish	14.9049	17.7505	1.89621	17	0	0.411765	0.411765	0	NA	NO	0
Aspredinidae	Ray-finned Fish	6.27586	9.1531	1.89548	43	0	0.0697674	0.0697674	0	NA	NO	0
Squalidae	Chondrichthyes	8.34305	10.4627	1.88938	35	0.228571	1	0.685714	0.333333	0	NO	8
Diploglossidae	Lepidosaurs	5.70371	7.75177	1.88187	51	0.254902	0.784314	0.705882	0.361111	0.846154	NO	13
Hemiscylliidae	Chondrichthyes	10.6911	12.7837	1.87861	17	0.470588	0.941176	0.882353	0.533333	0	NO	8
Isonidae	Ray-finned Fish	4.7209	9.0045	1.86677	5	0	0	0	NA	NA	NO	0
Pyxicephalidae	Amphibians	10.6517	12.1293	1.85333	85	0.188235	0.929412	0.894118	0.210526	0.25	NO	16
Lacertidae	Lepidosaurs	10.4954	12.0159	1.83882	345	0.115942	0.675362	0.617391	0.187793	0.85	NO	40
Serpenticobitidae	Ray-finned Fish	4.49365	8.1584	1.82231	3	0.333333	0.333333	0.333333	1	0	NO	1
Rajidae	Chondrichthyes	7.64394	9.8097	1.81615	165	0.163636	0.806061	0.654545	0.25	0.0740741	NO	27
Rivulidae	Ray-finned Fish	6.75293	8.62909	1.81491	424	0.0613208	0.125	0.125	0.490566	0.730769	NO	26
Antennariidae	Ray-finned Fish	11.3085	12.5382	1.81194	47	0	0.276596	0.276596	0	NA	NO	0
Potoroidae	Mammals	5.19506	6.46327	1.80237	8	0.5	1	1	0.5	1	NO	4
Pentanchidae	Chondrichthyes	9.69855	12.1174	1.79375	90	0.0666667	1	0.866667	0.0769231	0	NO	6
Etmopteridae	Chondrichthyes	11.6797	13.2376	1.793	52	0.0192308	0.942308	0.846154	0.0227273	0	NO	1
Chimaeridae	Chondrichthyes	10.0571	12.9961	1.77988	45	0.0666667	0.888889	0.711111	0.09375	0	NO	3
Rhyacotritonidae	Amphibians	12.0358	14.1299	1.77819	4	0.25	1	1	0.25	0	NO	1
Hylodidae	Amphibians	8.1838	10.6793	1.77755	47	0	0.851064	0.255319	0	NA	NO	0
Dermophiidae	Amphibians	15.2516	18.7829	1.77112	14	0	1	0.714286	0	NA	NO	0
Ceratobatrachidae	Amphibians	8.26558	10.7954	1.76979	98	0.255102	0.989796	0.867347	0.294118	0.04	NO	25
Iguanidae	Lepidosaurs	3.03649	4.57078	1.76767	44	0.659091	0.909091	0.886364	0.74359	0.448276	NO	29
Notacanthidae	Ray-finned Fish	8.94068	10.6336	1.76421	12	0	0.25	0.25	0	NA	NO	0
Hydrobatidae	Birds	8.8591	10.556	1.76417	18	0.388889	1	1	0.388889	0.571429	NO	7
Carphodactylidae	Lepidosaurs	11.3666	12.2468	1.76218	31	0.193548	1	1	0.193548	0.666667	NO	6
Cynodontidae	Ray-finned Fish	5.61713	7.57648	1.74764	8	0	0	0	NA	NA	NO	0
Rachycentridae	Ray-finned Fish	39.0837	39.1036	1.74127	1	0	1	1	0	NA	NO	0
Cadeidae	Lepidosaurs	35.3949	37.5573	1.7319	2	0	1	1	0	NA	NO	0
Zeidae	Ray-finned Fish	8.58795	10.1863	1.73156	6	0	0.333333	0.333333	0	NA	NO	0
Indriidae	Mammals	1.2855	2.26963	1.72859	19	1	1	1	1	0.631579	YES	19
Congiopodidae	Ray-finned Fish	10.7558	12.5092	1.71447	9	0	0.444444	0.444444	0	NA	NO	0
Podicipedidae	Birds	10.2986	11.9024	1.70148	20	0.25	1	1	0.25	1	NO	5
Anguidae	Lepidosaurs	6.07129	7.41364	1.67897	85	0.329412	0.8	0.682353	0.482759	0.535714	NO	28
Phycidae	Ray-finned Fish	12.0276	12.5729	1.67588	11	0	0.454545	0.454545	0	NA	NO	0
Anabantidae	Ray-finned Fish	8.74007	10.8681	1.6734	33	0.0606061	0.636364	0.636364	0.0952381	1	NO	2
Megadermatidae	Mammals	13.3401	13.5705	1.66922	6	0.333333	1	1	0.333333	1	NO	2
Zaproridae	Ray-finned Fish	3.11696	7.54723	1.65484	1	0	0	0	NA	NA	NO	0
Hylidae	Amphibians	6.5759	8.32756	1.65276	719	0.200278	0.859527	0.739917	0.270677	0.361111	NO	144
Megophryidae	Amphibians	6.5212	7.9736	1.64945	244	0.233607	0.75	0.602459	0.387755	0.0701754	NO	57
Chilodontidae	Ray-finned Fish	3.66857	6.85775	1.64891	8	0	0	0	NA	NA	NO	0
Potamotrygonidae	Chondrichthyes	5.91436	7.9389	1.64775	35	0.0285714	0.485714	0.114286	0.25	0	NO	1
Dicroglossidae	Amphibians	8.64893	10.0642	1.6419	212	0.165094	0.65566	0.580189	0.284553	0.314286	NO	35
Anchariidae	Ray-finned Fish	2.82899	7.30113	1.63448	6	0.333333	0.5	0.5	0.666667	0	NO	2
Chaetopidae	Birds	11.1914	12.9919	1.63377	2	0	1	1	0	NA	NO	0
Peucedramidae	Birds	31.1577	31.1577	1.63257	1	0	1	1	0	NA	NO	0
Gekkonidae	Lepidosaurs	8.43523	10.0203	1.63068	1292	0.106037	0.609907	0.514706	0.206015	0.510949	NO	137
Nothobranchiidae	Ray-finned Fish	6.65987	7.60557	1.6189	274	0.379562	0.762774	0.762774	0.497608	0.528846	NO	104
Pareidae	Lepidosaurs	13.7776	15.0024	1.61856	26	0	0.653846	0.538462	0	NA	NO	0
Platycephalidae	Ray-finned Fish	9.46954	10.7571	1.6098	80	0	0.3875	0.3875	0	NA	NO	0
Atherinidae	Ray-finned Fish	7.82731	8.92828	1.60639	71	0.112676	0.422535	0.422535	0.266667	0.75	NO	8
Perciliidae	Ray-finned Fish	3.08716	7.6647	1.60481	2	0	0	0	NA	NA	NO	0
Diplodactylidae	Lepidosaurs	8.61509	9.32467	1.60449	153	0.215686	0.921569	0.882353	0.244444	0.666667	NO	33
Menuridae	Birds	15.9834	18.6499	1.59061	2	0	1	1	0	NA	NO	0
Elassomatidae	Ray-finned Fish	5.41229	6.39386	1.58484	7	0.428571	1	1	0.428571	0.333333	NO	3
Bathymasteridae	Ray-finned Fish	3.80688	6.47899	1.5709	7	0	0	0	NA	NA	NO	0
Ranidae	Amphibians	9.57039	10.8839	1.56625	391	0.204604	0.849105	0.746803	0.273973	0.2875	NO	80
Botiidae	Ray-finned Fish	7.9246	8.72703	1.56381	10	0.2	0.5	0.5	0.4	1	NO	2
Nandiniidae	Mammals	27.0865	27.0865	1.56372	1	0	1	1	0	NA	NO	0
Chelydridae	Testudines	4.61447	7.66639	1.56324	5	0.4	0.6	0.6	0.666667	0	NO	2
Struthionidae	Birds	6.37792	13.8988	1.5604	2	0.5	1	1	0.5	1	NO	1
Siphonopidae	Amphibians	7.83079	10.185	1.55665	28	0	0.642857	0.357143	0	NA	NO	0
Regalecidae	Ray-finned Fish	27.4187	27.741	1.55334	3	0	1	1	0	NA	NO	0
Leptodactylidae	Amphibians	9.94448	11.4437	1.5504	213	0.0422535	0.826291	0.657277	0.0642857	0.444444	NO	9
Aramidae	Birds	28.729	28.729	1.54465	1	0	1	1	0	NA	NO	0
Xenodermidae	Lepidosaurs	7.96564	9.96278	1.53993	20	0.1	0.65	0.6	0.166667	0.5	NO	2
Panuridae	Birds	28.4116	28.4116	1.53938	1	0	1	1	0	NA	NO	0
Leptotyphlopidae	Lepidosaurs	5.56602	7.79635	1.53719	142	0.056338	0.549296	0.422535	0.133333	0.75	NO	8
Muraenesocidae	Ray-finned Fish	6.37543	8.48363	1.53457	15	0	0.133333	0.133333	0	NA	NO	0
Brachycephalidae	Amphibians	8.13892	9.75333	1.53037	73	0	0.506849	0.232877	0	NA	NO	0
Heterocephalidae	Mammals	27.7198	27.7198	1.52818	1	0	1	1	0	NA	NO	0
Erythrinidae	Ray-finned Fish	3.85896	7.66067	1.52314	18	0	0.111111	0.111111	0	NA	NO	0
Acrochordidae	Lepidosaurs	28.4399	28.9003	1.51351	3	0	1	1	0	NA	NO	0
Percopsidae	Ray-finned Fish	24.9506	27.2045	1.50673	2	0	1	1	0	NA	NO	0
Pseudocarchariidae	Chondrichthyes	19.0722	30.832	1.50564	1	0	1	1	0	NA	NO	0
Hoplichthyidae	Ray-finned Fish	5.43143	6.65591	1.50158	13	0	0	0	NA	NA	NO	0
Howellidae	Ray-finned Fish	4.63193	7.73628	1.4967	9	0	0.111111	0.111111	0	NA	NO	0
Ptilichthyidae	Ray-finned Fish	2.77799	6.59302	1.49666	1	0	0	0	NA	NA	NO	0
Centrolenidae	Amphibians	6.18657	7.32463	1.49154	143	0.314685	0.839161	0.706294	0.445545	0.111111	NO	45
Ptychadenidae	Amphibians	13.8495	15.5301	1.48483	59	0.0338983	0.881356	0.728814	0.0465116	1	NO	2
Hypsiprymnodontidae	Mammals	27.1726	27.1726	1.48096	1	0	1	1	0	NA	NO	0
Bucerotidae	Birds	5.32166	6.38462	1.48007	62	0.403226	1	1	0.403226	0.84	NO	25
Setarchidae	Ray-finned Fish	8.91573	10.9324	1.47677	7	0	0.285714	0.285714	0	NA	NO	0
Hypocoliidae	Birds	27.0918	27.1826	1.47652	1	0	1	1	0	NA	NO	0
Pataecidae	Ray-finned Fish	3.07696	6.86527	1.47231	3	0	0	0	NA	NA	NO	0
Caeciliidae	Amphibians	8.4854	10.9591	1.46473	43	0	0.976744	0.488372	0	NA	NO	0
Prosymnidae	Lepidosaurs	7.20284	9.5244	1.45954	16	0.0625	0.625	0.625	0.1	1	NO	1
Rhagologidae	Birds	27.4032	27.452	1.4562	1	0	1	1	0	NA	NO	0
Ifritidae	Birds	26.8604	26.8676	1.45561	1	0	1	1	0	NA	NO	0
Xantusiidae	Lepidosaurs	9.53606	10.0886	1.45366	35	0.114286	0.771429	0.542857	0.210526	0.75	NO	4
Paraulopidae	Ray-finned Fish	12.6506	13.8791	1.45108	14	0	0.714286	0.714286	0	NA	NO	0
Triportheidae	Ray-finned Fish	5.34782	6.86847	1.44151	23	0	0.0869565	0.0869565	0	NA	NO	0
Cryptacanthodidae	Ray-finned Fish	4.33214	5.42285	1.44121	4	0	0	0	NA	NA	NO	0
Arhynchobatidae	Chondrichthyes	6.56047	8.18726	1.43407	114	0.0701754	0.964912	0.763158	0.091954	0.5	NO	8
Balaenidae	Mammals	3.79544	3.80213	1.43269	4	0.5	1	1	0.5	1	NO	2
Phyllodactylidae	Lepidosaurs	8.79899	10.3144	1.43034	148	0.114865	0.736486	0.682432	0.168317	0.294118	NO	17
Boidae	Lepidosaurs	6.89715	7.83652	1.42439	62	0.145161	0.5	0.483871	0.3	0.555556	NO	9
Megachasmidae	Chondrichthyes	21.9667	33.6165	1.42105	1	0	1	1	0	NA	NO	0
Amphisbaenidae	Lepidosaurs	5.14611	7.09588	1.41901	179	0.0670391	0.49162	0.318436	0.210526	0.583333	NO	12
Salangidae	Ray-finned Fish	4.85797	5.77851	1.41164	20	0.05	0.1	0.1	0.5	1	NO	1
Coliidae	Birds	29.2213	30.0543	1.4075	6	0	1	1	0	NA	NO	0
Pseudoxyrhophiidae	Lepidosaurs	8.559	9.32974	1.39687	90	0.222222	0.888889	0.833333	0.266667	0.75	NO	20
Polynemidae	Ray-finned Fish	6.79512	8.28004	1.39546	42	0.0238095	0.357143	0.357143	0.0666667	1	NO	1
Eulacestomidae	Birds	28.5801	29.4899	1.39518	1	0	1	1	0	NA	NO	0
Leiosauridae	Lepidosaurs	7.54625	8.45662	1.38733	34	0.205882	0.911765	0.823529	0.25	0.571429	NO	7
Muraenolepididae	Ray-finned Fish	5.11657	6.35851	1.3857	9	0	0	0	NA	NA	NO	0
Nemichthyidae	Ray-finned Fish	6.11237	8.92665	1.38314	9	0	0.333333	0.333333	0	NA	NO	0
Lophotidae	Ray-finned Fish	28.2456	28.4377	1.38291	4	0	1	1	0	NA	NO	0
Gadidae	Ray-finned Fish	6.08828	7.83027	1.36887	23	0.0869565	0.347826	0.347826	0.25	0	NO	2
Phyllomedusidae	Amphibians	7.59298	8.38124	1.36579	64	0.109375	0.875	0.671875	0.162791	0.285714	NO	7
Urolophidae	Chondrichthyes	11.5912	13.0735	1.36229	28	0.214286	0.964286	0.928571	0.230769	0	NO	6
Embiotocidae	Ray-finned Fish	6.93097	8.00887	1.3592	23	0	0.304348	0.304348	0	NA	NO	0
Pseudotriakidae	Chondrichthyes	17.136	21.0751	1.35779	4	0	1	1	0	NA	NO	0
Atherinopsidae	Ray-finned Fish	6.10982	7.63791	1.35439	111	0.234234	0.576577	0.576577	0.40625	0.769231	NO	26
Cheilodactylidae	Ray-finned Fish	5.23622	6.2917	1.3543	27	0	0.037037	0.037037	0	NA	NO	0
Polypteridae	Ray-finned Fish	18.0668	18.3114	1.35215	14	0	0.928571	0.928571	0	NA	NO	0
Nyctibiidae	Birds	25.7929	26.4952	1.35064	7	0	1	1	0	NA	NO	0
Apogonidae	Ray-finned Fish	5.50115	7.24801	1.34932	354	0.00847458	0.141243	0.141243	0.06	0.666667	NO	3
Latridae	Ray-finned Fish	4.21676	5.53461	1.34543	5	0	0	0	NA	NA	NO	0
Aulopidae	Ray-finned Fish	11.2466	13.2606	1.33937	15	0	0.6	0.6	0	NA	NO	0
Ciconiidae	Birds	10.0034	11.1322	1.336	20	0.25	1	1	0.25	1	NO	5
Podargidae	Birds	14.2648	15.0728	1.33224	14	0	1	1	0	NA	NO	0
Lotidae	Ray-finned Fish	6.69209	8.35878	1.32929	22	0	0.318182	0.318182	0	NA	NO	0
Lamproliidae	Birds	9.0097	9.67718	1.3274	4	0.5	1	1	0.5	0.5	NO	2
Xenopeltidae	Lepidosaurs	26.4281	28.1126	1.32738	2	0	1	1	0	NA	NO	0
Hemitripteridae	Ray-finned Fish	4.43773	5.92462	1.32437	8	0	0	0	NA	NA	NO	0
Uropeltidae	Lepidosaurs	5.86426	7.40735	1.32397	56	0.0714286	0.642857	0.392857	0.181818	0.5	NO	4
Psophiidae	Birds	3.92957	5.13314	1.32355	6	0.5	1	1	0.5	0.333333	NO	3
Emydidae	Testudines	3.75193	4.4905	1.31441	53	0.396226	0.773585	0.735849	0.538462	0.190476	NO	21
Colocongridae	Ray-finned Fish	4.89494	7.09323	1.31316	7	0	0.142857	0.142857	0	NA	NO	0
Polychrotidae	Lepidosaurs	11.7369	12.8262	1.31264	8	0.125	0.875	0.75	0.166667	0	NO	1
Alopoglossidae	Lepidosaurs	6.47565	7.88106	1.31198	23	0.0869565	0.869565	0.695652	0.125	0.5	NO	2
Gruidae	Birds	3.0787	3.94191	1.31077	15	0.666667	1	1	0.666667	0.9	NO	10
Trachinidae	Ray-finned Fish	8.17946	9.09896	1.3071	9	0	0.666667	0.666667	0	NA	NO	0
Chloropseidae	Birds	6.28128	7.47359	1.30655	13	0.307692	1	1	0.307692	1	NO	4
Channidae	Ray-finned Fish	10.8319	11.7879	1.30389	42	0.047619	0.571429	0.571429	0.0833333	1	NO	2
Cacatuidae	Birds	8.31151	9.03787	1.30254	21	0.333333	1	1	0.333333	0.857143	NO	7
Cirrhitidae	Ray-finned Fish	10.4194	12.2728	1.30015	33	0.030303	0.666667	0.666667	0.0454545	1	NO	1
Calyptophilidae	Birds	6.40907	7.21237	1.29495	2	0.5	1	1	0.5	1	NO	1
Ictaluridae	Ray-finned Fish	6.62715	7.69174	1.2942	50	0.3	0.88	0.88	0.340909	0.8	NO	15
Pelodytidae	Amphibians	10.118	11.5557	1.29264	5	0	0.8	0.8	0	NA	NO	0
Dromadidae	Birds	24.1059	24.1059	1.28762	1	0	1	1	0	NA	NO	0
Serrivomeridae	Ray-finned Fish	8.53175	9.67524	1.2819	9	0	0.333333	0.333333	0	NA	NO	0
Alsodidae	Amphibians	4.52601	5.29105	1.28103	30	0.533333	0.966667	0.766667	0.695652	0.1875	NO	16
Cobitidae	Ray-finned Fish	5.93413	6.99237	1.27399	262	0.167939	0.477099	0.477099	0.352	0.386364	NO	44
Blanidae	Lepidosaurs	10.5302	11.453	1.27348	7	0	0.571429	0.571429	0	NA	NO	0
Modulatricidae	Birds	11.5534	12.5733	1.26467	3	0.333333	1	1	0.333333	1	NO	1
Scincidae	Lepidosaurs	6.61396	7.67606	1.26389	1676	0.116945	0.727924	0.634248	0.184384	0.637755	NO	196
Chlamyphoridae	Mammals	6.17716	7.29488	1.26026	13	0.153846	1	0.769231	0.2	1	NO	2
Procellariidae	Birds	5.54414	6.16422	1.26013	96	0.447917	1	1	0.447917	0.790698	NO	43
Hoplocercidae	Lepidosaurs	7.25052	7.77525	1.25866	19	0.263158	0.789474	0.789474	0.333333	0.4	NO	5
Jacanidae	Birds	12.8278	13.6424	1.25667	8	0.125	1	1	0.125	1	NO	1
Odontophrynidae	Amphibians	6.45718	7.98953	1.25657	52	0.0192308	0.519231	0.365385	0.0526316	1	NO	1
Badidae	Ray-finned Fish	6.00041	7.34351	1.25638	30	0.0333333	0.233333	0.233333	0.142857	0	NO	1
Phoenicopteridae	Birds	10.9611	11.357	1.25583	6	0.166667	1	1	0.166667	1	NO	1
Moringuidae	Ray-finned Fish	4.97036	6.76486	1.25084	15	0	0.2	0.2	0	NA	NO	0
Gasterosteidae	Ray-finned Fish	8.67737	9.65527	1.25067	17	0.176471	0.764706	0.764706	0.230769	0.666667	NO	3
Scoloplacidae	Ray-finned Fish	2.50299	4.94535	1.24515	6	0	0	0	NA	NA	NO	0
Petromuridae	Mammals	23.1338	23.1717	1.24298	1	0	1	1	0	NA	NO	0
Notopteridae	Ray-finned Fish	19.3556	19.6967	1.24227	9	0	1	1	0	NA	NO	0
Myrmecophagidae	Mammals	7.5975	8.2366	1.23797	3	0.333333	1	1	0.333333	1	NO	1
Cheirogaleidae	Mammals	1.98799	2.85272	1.23776	40	0.9	0.975	0.95	0.947368	0.527778	NO	36
Diplomystidae	Ray-finned Fish	4.48068	6.9435	1.22894	7	0	0	0	NA	NA	NO	0
Alepisauridae	Ray-finned Fish	20.6553	21.6596	1.22242	2	0	1	1	0	NA	NO	0
Giraffidae	Mammals	2.60154	3.23949	1.21835	5	0.4	0.4	0.4	1	0.5	NO	2
Monodactylidae	Ray-finned Fish	5.22488	9.0856	1.21372	6	0	0.333333	0.333333	0	NA	NO	0
Gempylidae	Ray-finned Fish	5.81188	8.9149	1.21089	24	0	0.375	0.375	0	NA	NO	0
Kryptoglanidae	Ray-finned Fish	3.81408	4.71307	1.19974	1	0	0	0	NA	NA	NO	0
Camelidae	Mammals	1.76467	3.21731	1.19757	6	0.166667	0.5	0.5	0.333333	1	NO	1
Callichthyidae	Ray-finned Fish	5.78399	6.39755	1.19717	206	0.0145631	0.165049	0.165049	0.0882353	0.666667	NO	3
Hyperoliidae	Amphibians	6.81068	8.23047	1.19553	227	0.193833	0.973568	0.797357	0.243094	0.0227273	NO	44
Pseudaphritidae	Ray-finned Fish	2.29285	12.3343	1.19502	2	0	0.5	0.5	0	NA	NO	0
Rhamphichthyidae	Ray-finned Fish	4.01781	5.29806	1.18779	17	0	0	0	NA	NA	NO	0
Agamidae	Lepidosaurs	7.21741	8.40727	1.18507	515	0.0640777	0.625243	0.543689	0.117857	0.424242	NO	33
Musophagidae	Birds	16.3531	16.8752	1.18461	24	0.0833333	1	1	0.0833333	1	NO	2
Cariamidae	Birds	25.0573	28.0126	1.18403	2	0	1	1	0	NA	NO	0
Siluridae	Ray-finned Fish	5.69145	6.98376	1.18255	107	0.140187	0.598131	0.598131	0.234375	0.6	NO	15
Chlamydoselachidae	Chondrichthyes	17.5273	24.9259	1.17471	2	0	1	1	0	NA	NO	0
Dinomyidae	Mammals	20.4641	20.4644	1.17197	1	0	1	1	0	NA	NO	0
Microbiotheriidae	Mammals	1.88608	6.27923	1.15182	3	0	0.333333	0.333333	0	NA	NO	0
Lamprophiidae	Lepidosaurs	5.88318	7.40826	1.14777	82	0.0121951	0.390244	0.317073	0.0384615	0	NO	1
Esocidae	Ray-finned Fish	10.0762	11.5145	1.14252	7	0	0.571429	0.571429	0	NA	NO	0
Ceratophryidae	Amphibians	9.94003	11.2809	1.14084	12	0.0833333	1	0.833333	0.1	0	NO	1
Platacanthomyidae	Mammals	4.71146	5.31484	1.13685	5	0.2	0.4	0.4	0.5	1	NO	1
Champsodontidae	Ray-finned Fish	3.60794	5.66063	1.13604	13	0	0.0769231	0.0769231	0	NA	NO	0
Balitoridae	Ray-finned Fish	5.22247	7.1061	1.13481	252	0.0833333	0.448413	0.448413	0.185841	0.333333	NO	21
Diomedeidae	Birds	1.80164	3.08075	1.13468	22	0.681818	1	1	0.681818	0.733333	NO	15
Vombatidae	Mammals	2.82619	5.74882	1.12021	3	0.333333	1	1	0.333333	1	NO	1
Amblycipitidae	Ray-finned Fish	4.51354	5.84911	1.11743	39	0.0769231	0.205128	0.205128	0.375	0.333333	NO	3
Anablepidae	Ray-finned Fish	2.98207	5.75323	1.1101	18	0	0.111111	0.111111	0	NA	NO	0
Poeciliidae	Ray-finned Fish	4.76168	5.79294	1.10947	346	0.121387	0.410405	0.410405	0.295775	0.5	NO	42
Erethistidae	Ray-finned Fish	4.91767	6.30262	1.1064	46	0	0.152174	0.152174	0	NA	NO	0
Lepilemuridae	Mammals	1.27948	1.90656	1.10465	26	1	1	1	1	0.961538	YES	26
Amphiumidae	Amphibians	13.2462	14.7711	1.1033	3	0	1	1	0	NA	NO	0
Doradidae	Ray-finned Fish	4.40451	5.4185	1.09474	96	0	0.0625	0.0625	0	NA	NO	0
Chinchillidae	Mammals	4.57469	5.62232	1.09325	6	0.333333	1	0.666667	0.5	1	NO	2
Homalopsidae	Lepidosaurs	6.58203	7.95092	1.09201	54	0.0555556	0.703704	0.425926	0.130435	0.333333	NO	3
Barbuccidae	Ray-finned Fish	5.87081	10.527	1.08951	2	0	0.5	0.5	0	NA	NO	0
Haemulidae	Ray-finned Fish	10.9255	11.4218	1.08711	134	0.0149254	0.626866	0.626866	0.0238095	0.5	NO	2
Cyprinodontidae	Ray-finned Fish	3.03907	3.73799	1.0845	132	0.333333	0.477273	0.477273	0.698413	0.363636	NO	44
Neoscopelidae	Ray-finned Fish	28.3095	29.1436	1.0839	6	0	1	1	0	NA	NO	0
Capromyidae	Mammals	2.12598	2.7291	1.08245	11	0.727273	0.909091	0.909091	0.8	1	NO	8
Tinamidae	Birds	10.6597	11.6173	1.08109	47	0.12766	1	1	0.12766	1	NO	6
Crotaphytidae	Lepidosaurs	6.00205	6.49006	1.07882	12	0.25	1	1	0.25	0.666667	NO	3
Tytonidae	Birds	6.30817	7.53907	1.06884	16	0.3125	1	0.9375	0.333333	0.8	NO	5
Typhlopidae	Lepidosaurs	4.29327	5.59495	1.06718	272	0.0919118	0.6875	0.408088	0.225225	0.36	NO	25
Pseudopimelodidae	Ray-finned Fish	4.45279	5.49477	1.06567	39	0	0.128205	0.128205	0	NA	NO	0
Balistidae	Ray-finned Fish	5.46095	6.10064	1.06246	43	0.0465116	0.302326	0.302326	0.153846	1	NO	2
Kinosternidae	Testudines	5.97326	6.85872	1.0606	27	0.111111	0.851852	0.740741	0.15	0.333333	NO	3
Teiidae	Lepidosaurs	6.20452	7.27797	1.05481	160	0.075	0.66875	0.63125	0.118812	0.666667	NO	12
Nandidae	Ray-finned Fish	6.41292	9.09342	1.05237	9	0	0.555556	0.555556	0	NA	NO	0
Profundulidae	Ray-finned Fish	3.9919	4.73383	1.04537	9	0.222222	0.222222	0.222222	1	0.5	NO	2
Gonostomatidae	Ray-finned Fish	15.565	17.5415	1.04507	31	0	0.903226	0.903226	0	NA	NO	0
Acrobatidae	Mammals	10.6514	13.6721	1.04167	3	0	0.666667	0.666667	0	NA	NO	0
Platylophidae	Birds	7.84803	7.90275	1.04122	1	0	1	1	0	NA	NO	0
Sulidae	Birds	5.06117	5.48686	1.04038	10	0.2	1	1	0.2	1	NO	2
Pempheridae	Ray-finned Fish	3.39531	5.11303	1.03456	78	0	0.025641	0.025641	0	NA	NO	0
Percidae	Ray-finned Fish	6.41088	6.99587	1.03272	238	0.243697	0.928571	0.928571	0.262443	0.862069	NO	58
Sirenidae	Amphibians	14.0238	15.6478	1.02978	5	0	0.8	0.8	0	NA	NO	0
Pelecanidae	Birds	13.3358	14.0719	1.02721	8	0	1	1	0	NA	NO	0
Psammophiidae	Lepidosaurs	5.43034	6.27129	1.02564	56	0	0.303571	0.303571	0	NA	NO	0
Cordylidae	Lepidosaurs	10.3644	11.2951	1.02518	69	0.0434783	0.869565	0.84058	0.0517241	0.666667	NO	3
Caenolestidae	Mammals	7.68087	8.22206	1.02303	7	0.428571	1	1	0.428571	1	NO	3
Pomacentridae	Ray-finned Fish	5.80389	6.46927	1.02175	400	0.0225	0.3075	0.3075	0.0731707	0.666667	NO	9
Ariommatidae	Ray-finned Fish	5.72705	7.91277	1.01791	7	0	0.428571	0.428571	0	NA	NO	0
Chaudhuriidae	Ray-finned Fish	2.38046	4.55944	1.01722	10	0.3	0.6	0.6	0.5	0	NO	3
Scolopacidae	Birds	8.06892	8.46783	1.0147	91	0.131868	1	1	0.131868	0.666667	NO	12
Bernieridae	Birds	9.38765	9.66276	1.0096	11	0.0909091	1	0.909091	0.1	1	NO	1
Oreoicidae	Birds	18.4258	18.7323	1.00951	3	0	1	1	0	NA	NO	0
Nomeidae	Ray-finned Fish	9.16949	10.8364	1.00763	16	0	0.625	0.625	0	NA	NO	0
Accipitridae	Birds	5.46759	5.98465	1.00657	248	0.221774	1	0.995968	0.222672	0.745455	NO	55
Plotosidae	Ray-finned Fish	4.28068	5.67135	1.0049	42	0.0952381	0.52381	0.52381	0.181818	1	NO	4
Erinaceidae	Mammals	5.51784	5.89907	1.0048	24	0.125	1	0.958333	0.130435	0.666667	NO	3
Mohouidae	Birds	5.65332	6.8565	1.00348	3	0.333333	1	1	0.333333	1	NO	1
Pangasiidae	Ray-finned Fish	4.66332	5.40342	1.00265	29	0.137931	0.655172	0.655172	0.210526	0.75	NO	4
Nototheniidae	Ray-finned Fish	3.6011	4.61584	0.998054	53	0	0.0377358	0.0377358	0	NA	NO	0
Hylobatidae	Mammals	1.19814	1.71923	0.998042	20	1	1	1	1	1	YES	20
Gaviidae	Birds	17.5818	17.9385	0.996878	5	0	1	1	0	NA	NO	0
Furipterididae	Mammals	3.61331	8.67451	0.989477	2	0.5	1	1	0.5	1	NO	1
Tetragonuridae	Ray-finned Fish	12.8157	13.1606	0.985234	3	0	0.666667	0.666667	0	NA	NO	0
Potamogalidae	Mammals	10.2953	12.4531	0.983273	3	0.333333	1	1	0.333333	1	NO	1
Symphysanodontidae	Ray-finned Fish	3.75688	5.73957	0.980469	13	0	0.153846	0.153846	0	NA	NO	0
Pelodryadidae	Amphibians	6.41336	7.77913	0.975622	207	0.0144928	0.589372	0.487923	0.029703	0	NO	3
Cynoglossidae	Ray-finned Fish	5.72325	6.79107	0.974578	145	0.00689655	0.406897	0.406897	0.0169492	0	NO	1
Viperidae	Lepidosaurs	5.01276	5.73143	0.974275	361	0.144044	0.592798	0.542936	0.265306	0.269231	NO	52
Bathyclupeidae	Ray-finned Fish	3.92377	4.87054	0.968882	7	0	0.142857	0.142857	0	NA	NO	0
Corcoracidae	Birds	17.3433	17.7985	0.968735	2	0	1	1	0	NA	NO	0
Nemipteridae	Ray-finned Fish	8.35499	9.21476	0.96378	68	0.0147059	0.588235	0.588235	0.025	0	NO	1
Regulidae	Birds	18.0856	18.4791	0.96214	6	0	1	1	0	NA	NO	0
Nesomyidae	Mammals	5.42276	6.34995	0.962138	68	0.161765	0.941176	0.808824	0.2	1	NO	11
Anoplogastridae	Ray-finned Fish	4.9165	7.99863	0.961998	2	0	0.5	0.5	0	NA	NO	0
Spheniscidae	Birds	5.05183	5.71774	0.961952	18	0.5	1	1	0.5	0.888889	NO	9
Zenarchopteridae	Ray-finned Fish	3.59655	4.69129	0.960196	63	0.142857	0.650794	0.650794	0.219512	0.333333	NO	9
Bovichtidae	Ray-finned Fish	2.97066	5.1804	0.960063	11	0	0.181818	0.181818	0	NA	NO	0
Cranoglanididae	Ray-finned Fish	3.0654	4.82699	0.958161	5	0.2	0.4	0.4	0.5	0	NO	1
Synbranchidae	Ray-finned Fish	2.20372	3.5114	0.958022	25	0.24	0.48	0.48	0.5	0.333333	NO	6
Sparidae	Ray-finned Fish	9.24609	9.67925	0.957763	159	0.081761	0.773585	0.773585	0.105691	0.846154	NO	13
Fundulidae	Ray-finned Fish	6.34839	7.0649	0.955694	43	0.209302	0.906977	0.906977	0.230769	0.777778	NO	9
Philepittidae	Birds	7.13894	8.44966	0.950124	4	0.25	1	1	0.25	1	NO	1
Orectolobidae	Chondrichthyes	12.3541	13.4581	0.949299	12	0	0.916667	0.833333	0	NA	NO	0
Centrolophidae	Ray-finned Fish	5.97081	6.93448	0.9461	31	0	0.354839	0.354839	0	NA	NO	0
Paralichthyidae	Ray-finned Fish	6.16988	7.40601	0.944177	109	0.00917431	0.458716	0.458716	0.02	0	NO	1
Ostraciidae	Ray-finned Fish	5.61054	6.58978	0.941725	25	0	0.28	0.28	0	NA	NO	0
Sternoptychidae	Ray-finned Fish	10.7669	11.7228	0.938817	74	0	0.743243	0.743243	0	NA	NO	0
Gerreidae	Ray-finned Fish	8.39878	9.54918	0.938112	53	0	0.584906	0.584906	0	NA	NO	0
Ascaphidae	Amphibians	10.5153	18.6499	0.936698	2	0	1	1	0	NA	NO	0
Ptiliogonatidae	Birds	16.8659	17.2788	0.935391	4	0	1	1	0	NA	NO	0
Ambassidae	Ray-finned Fish	5.75239	6.83591	0.934107	51	0.0980392	0.686275	0.686275	0.142857	0.4	NO	5
Gymnophthalmidae	Lepidosaurs	5.69339	6.62437	0.931593	257	0.0972763	0.684825	0.571984	0.170068	0.12	NO	25
Hemiprocnidae	Birds	18.8461	19.5603	0.929194	4	0	1	1	0	NA	NO	0
Sternopygidae	Ray-finned Fish	2.76936	4.34636	0.928828	46	0	0.0434783	0.0434783	0	NA	NO	0
Pholidae	Ray-finned Fish	3.93507	4.76535	0.925871	15	0	0.133333	0.133333	0	NA	NO	0
Vaillantellidae	Ray-finned Fish	4.35886	7.92518	0.923515	3	0	0.666667	0.666667	0	NA	NO	0
Antilocapridae	Mammals	16.4661	16.4763	0.91887	1	0	1	1	0	NA	NO	0
Scopelarchidae	Ray-finned Fish	7.53402	8.13051	0.917035	18	0	0.833333	0.833333	0	NA	NO	0
Nematistiidae	Ray-finned Fish	3.79811	4.57029	0.907952	1	0	0	0	NA	NA	NO	0
Gymnotidae	Ray-finned Fish	4.57065	5.45745	0.907287	41	0.0731707	0.268293	0.268293	0.272727	0.333333	NO	3
Anomochilidae	Lepidosaurs	4.44059	5.5877	0.901586	3	0	1	0.333333	0	NA	NO	0
Akysidae	Ray-finned Fish	2.67676	3.94318	0.896915	57	0.0701754	0.157895	0.157895	0.444444	0.75	NO	4
Merlucciidae	Ray-finned Fish	3.99268	5.19624	0.896908	22	0.0454545	0.409091	0.409091	0.111111	1	NO	1
Cetopsidae	Ray-finned Fish	2.98683	4.41184	0.893673	42	0	0.166667	0.166667	0	NA	NO	0
Pleuronectidae	Ray-finned Fish	3.6438	4.73904	0.890438	103	0.00970874	0.174757	0.174757	0.0555556	1	NO	1
Equidae	Mammals	1.79399	2.36209	0.889007	9	0.444444	0.777778	0.777778	0.571429	1	NO	4
Pimelodidae	Ray-finned Fish	3.07389	4.14759	0.88727	113	0.0176991	0.0619469	0.0619469	0.285714	0.5	NO	2
Indostomidae	Ray-finned Fish	5.12706	7.04279	0.882205	3	0.333333	1	1	0.333333	0	NO	1
Macrosphenidae	Birds	8.81993	9.54297	0.880616	21	0.0952381	1	0.952381	0.1	1	NO	2
Phaenicophilidae	Birds	5.95435	6.7556	0.880478	4	0.25	1	1	0.25	1	NO	1
Berycidae	Ray-finned Fish	8.34422	8.77815	0.880354	10	0	0.7	0.7	0	NA	NO	0
Charadriidae	Birds	7.10315	7.62125	0.880218	71	0.112676	1	0.985915	0.114286	1	NO	8
Abrocomidae	Mammals	1.72054	3.10839	0.877893	10	0.1	0.9	0.3	0.333333	1	NO	1
Diodontidae	Ray-finned Fish	4.52234	5.94524	0.875793	16	0	0.4375	0.4375	0	NA	NO	0
Odontobatrachidae	Amphibians	3.33108	4.70182	0.875669	5	0.6	1	1	0.6	0	NO	3
Chrysochloridae	Mammals	3.47466	4.3487	0.870079	21	0.47619	1	0.857143	0.555556	0.7	NO	10
Serrasalmidae	Ray-finned Fish	3.50202	4.32318	0.868152	98	0	0.0204082	0.0204082	0	NA	NO	0
Hemiodontidae	Ray-finned Fish	2.59652	4.15418	0.867707	31	0	0.0645161	0.0645161	0	NA	NO	0
Melanotaeniidae	Ray-finned Fish	2.82794	3.43581	0.861657	95	0.526316	0.978947	0.978947	0.537634	0.34	NO	50
Pentacerotidae	Ray-finned Fish	3.19806	3.82366	0.856593	13	0	0.153846	0.153846	0	NA	NO	0
Gobiidae	Ray-finned Fish	4.81471	5.78959	0.854644	1844	0.0563991	0.450108	0.450108	0.125301	0.394231	NO	104
Fistulariidae	Ray-finned Fish	19.0302	19.1703	0.854054	4	0	1	1	0	NA	NO	0
Enoplosidae	Ray-finned Fish	8.28013	20.1864	0.852645	1	0	1	1	0	NA	NO	0
Terapontidae	Ray-finned Fish	4.92503	5.40712	0.851182	59	0.186441	0.745763	0.745763	0.25	0.363636	NO	11
Acropomatidae	Ray-finned Fish	2.81446	4.21492	0.851092	37	0	0.162162	0.162162	0	NA	NO	0
Callionymidae	Ray-finned Fish	3.09379	4.18145	0.846693	196	0.00510204	0.0969388	0.0969388	0.0526316	0	NO	1
Caproidae	Ray-finned Fish	3.54682	4.87916	0.844762	18	0	0.166667	0.166667	0	NA	NO	0
Turnicidae	Birds	6.14439	6.9123	0.843602	18	0.222222	1	0.944444	0.235294	0.75	NO	4
Ailiidae	Ray-finned Fish	3.24292	6.23642	0.843439	1	0	1	1	0	NA	NO	0
Centriscidae	Ray-finned Fish	5.11148	6.07812	0.843402	12	0	0.666667	0.666667	0	NA	NO	0
Atractaspididae	Lepidosaurs	4.16239	5.30611	0.841783	69	0	0.391304	0.333333	0	NA	NO	0
Orthonychidae	Birds	16.9322	17.2285	0.840985	3	0	1	1	0	NA	NO	0
Eupleridae	Mammals	2.66718	3.34627	0.839116	11	0.727273	0.818182	0.818182	0.888889	0.75	NO	8
Tarsiidae	Mammals	1.82211	3.02318	0.838448	13	0.846154	1	0.923077	0.916667	0.181818	NO	11
Stichaeidae	Ray-finned Fish	2.36717	3.74882	0.837933	69	0	0	0	NA	NA	NO	0
Hemiramphidae	Ray-finned Fish	3.5311	5.01881	0.836975	60	0.0166667	0.283333	0.283333	0.0588235	0	NO	1
Auchenipteridae	Ray-finned Fish	3.23979	4.41901	0.836611	120	0	0.116667	0.116667	0	NA	NO	0
Derichthyidae	Ray-finned Fish	14.7252	15.6658	0.834566	3	0	1	1	0	NA	NO	0
Tayassuidae	Mammals	2.19492	2.4571	0.827663	5	0.4	0.6	0.6	0.666667	1	NO	2
Anhingidae	Birds	12.386	12.9263	0.82617	4	0	1	1	0	NA	NO	0
Mullidae	Ray-finned Fish	7.92923	9.25601	0.825996	86	0.0232558	0.686047	0.686047	0.0338983	0	NO	2
Monocentridae	Ray-finned Fish	9.91898	10.6918	0.825731	4	0	0.75	0.75	0	NA	NO	0
Peramelidae	Mammals	3.82632	4.32373	0.823966	19	0.421053	0.947368	0.894737	0.470588	0.625	NO	8
Scaphiopodidae	Amphibians	13.4866	13.8964	0.821567	7	0	1	1	0	NA	NO	0
Cuculidae	Birds	9.796	10.3044	0.82149	149	0.0738255	1	1	0.0738255	0.909091	NO	11
Cyprinidae	Ray-finned Fish	3.81201	4.60809	0.813875	3133	0.174274	0.557613	0.557613	0.312536	0.393773	NO	546
Cyclopteridae	Ray-finned Fish	2.31262	3.59731	0.811867	27	0	0	0	NA	NA	NO	0
Soleidae	Ray-finned Fish	3.41597	4.67207	0.811416	179	0.0167598	0.268156	0.268156	0.0625	0	NO	3
Apistidae	Ray-finned Fish	2.5681	5.4057	0.810223	3	0	0.333333	0.333333	0	NA	NO	0
Ursidae	Mammals	3.61147	3.74749	0.809118	8	0.75	1	1	0.75	0.833333	NO	6
Tropiduridae	Lepidosaurs	6.34031	7.13853	0.808817	136	0.102941	0.845588	0.757353	0.135922	0.142857	NO	14
Centrarchidae	Ray-finned Fish	7.82962	8.0779	0.808566	38	0.0263158	0.842105	0.842105	0.03125	1	NO	1
Scombridae	Ray-finned Fish	9.16593	9.56188	0.806809	54	0.0925926	0.796296	0.796296	0.116279	0.6	NO	5
Recurvirostridae	Birds	4.34216	6.07644	0.806491	7	0.142857	1	1	0.142857	1	NO	1
Bathydraconidae	Ray-finned Fish	3.14791	3.65032	0.805883	17	0	0.176471	0.176471	0	NA	NO	0
Batrachoididae	Ray-finned Fish	3.80942	5.16724	0.801474	83	0.0963855	0.46988	0.46988	0.205128	0.375	NO	8
Pardalotidae	Birds	6.75576	7.02604	0.799127	4	0.25	1	1	0.25	1	NO	1
Synodontidae	Ray-finned Fish	10.4772	11.5896	0.794734	75	0	0.786667	0.786667	0	NA	NO	0
Moschidae	Mammals	1.06092	1.84572	0.792015	7	1	1	1	1	1	NO	7
Saccopharyngidae	Ray-finned Fish	4.90705	5.67727	0.790504	10	0	0.5	0.5	0	NA	NO	0
Lethrinidae	Ray-finned Fish	11.7724	12.2396	0.788455	41	0.0243902	0.878049	0.878049	0.0277778	1	NO	1
Molidae	Ray-finned Fish	8.09642	8.81579	0.786154	5	0.2	0.6	0.6	0.333333	0	NO	1
Opluridae	Lepidosaurs	10.5442	11.7715	0.785013	8	0	0.875	0.875	0	NA	NO	0
Zeledoniidae	Birds	14.8077	14.8077	0.784905	1	0	1	1	0	NA	NO	0
Ceratiidae	Ray-finned Fish	15.1988	15.2684	0.784014	4	0	1	1	0	NA	NO	0
Agonidae	Ray-finned Fish	3.03086	4.01425	0.783316	46	0	0.0434783	0.0434783	0	NA	NO	0
Bryconidae	Ray-finned Fish	3.81368	4.67416	0.782252	49	0.102041	0.469388	0.469388	0.217391	0.2	NO	5
Ardeidae	Birds	9.22837	9.70177	0.780666	64	0.140625	1	1	0.140625	0.666667	NO	9
Chlorophthalmidae	Ray-finned Fish	10.185	11.2143	0.780666	17	0	0.764706	0.764706	0	NA	NO	0
Microdesmidae	Ray-finned Fish	4.77711	5.77236	0.780574	89	0.011236	0.382022	0.382022	0.0294118	0	NO	1
Engraulidae	Ray-finned Fish	7.82441	8.93039	0.775471	150	0.0266667	0.66	0.66	0.040404	0.5	NO	4
Sciaenidae	Ray-finned Fish	5.60999	6.56032	0.773454	286	0.048951	0.692308	0.692308	0.0707071	0.571429	NO	14
Peristediidae	Ray-finned Fish	4.23877	5.22748	0.772824	45	0	0.311111	0.311111	0	NA	NO	0
Kuhliidae	Ray-finned Fish	3.53574	4.11009	0.77152	13	0.0769231	0.307692	0.307692	0.25	0	NO	1
Psophodidae	Birds	8.5518	8.96035	0.768895	5	0	1	0.8	0	NA	NO	0
Chirocentridae	Ray-finned Fish	15.9549	17.4436	0.767023	2	0	1	1	0	NA	NO	0
Eurylaimidae	Birds	5.58844	5.92083	0.766297	12	0.25	1	1	0.25	0.333333	NO	3
Trichiuridae	Ray-finned Fish	2.77085	4.18868	0.766176	45	0	0.2	0.2	0	NA	NO	0
Percophidae	Ray-finned Fish	2.86763	4.18074	0.765393	50	0	0.2	0.2	0	NA	NO	0
Todidae	Birds	15.1123	15.4745	0.764866	5	0	1	1	0	NA	NO	0
Phrynosomatidae	Lepidosaurs	7.35001	7.81182	0.762421	162	0.0987654	0.790123	0.753086	0.131148	0.3125	NO	16
Scatophagidae	Ray-finned Fish	6.46811	8.48306	0.760806	4	0	0.75	0.75	0	NA	NO	0
Radiicephalidae	Ray-finned Fish	17.2571	17.5873	0.758818	1	0	1	1	0	NA	NO	0
Rondeletiidae	Ray-finned Fish	11.1426	13.0702	0.754277	2	0	1	1	0	NA	NO	0
Pristolepididae	Ray-finned Fish	5.09089	6.53012	0.753519	8	0	0.375	0.375	0	NA	NO	0
Anhimidae	Birds	10.295	11.1314	0.751815	3	0	1	1	0	NA	NO	0
Phaethontidae	Birds	14.2546	14.8575	0.749828	3	0	1	1	0	NA	NO	0
Ariidae	Ray-finned Fish	4.0504	4.83699	0.747946	153	0.0457516	0.392157	0.392157	0.116667	0.428571	NO	7
Urocynchramidae	Birds	18.1979	18.1997	0.745066	1	0	1	1	0	NA	NO	0
Catostomidae	Ray-finned Fish	5.39033	5.60729	0.744942	77	0.168831	0.844156	0.844156	0.2	0.538462	NO	13
Iguanodectidae	Ray-finned Fish	2.53373	3.88174	0.743451	32	0	0.1875	0.1875	0	NA	NO	0
Cyclocoridae	Lepidosaurs	4.66037	6.35104	0.741259	7	0.142857	1	0.857143	0.166667	0	NO	1
Synaphobranchidae	Ray-finned Fish	2.77645	3.94435	0.73869	39	0	0.205128	0.205128	0	NA	NO	0
Trachipteridae	Ray-finned Fish	12.5097	13.6014	0.736799	10	0	0.9	0.9	0	NA	NO	0
Melamphaidae	Ray-finned Fish	6.90796	7.56688	0.736654	66	0	0.636364	0.636364	0	NA	NO	0
Iniidae	Mammals	1.41973	2.2917	0.736226	3	0.333333	0.333333	0.333333	1	1	NO	1
Halosauridae	Ray-finned Fish	6.67344	7.92526	0.735067	16	0	0.625	0.625	0	NA	NO	0
Bathysauridae	Ray-finned Fish	14.9544	16.7657	0.735018	2	0	1	1	0	NA	NO	0
Nettastomatidae	Ray-finned Fish	3.74599	4.78852	0.732226	42	0	0.309524	0.309524	0	NA	NO	0
Pythonidae	Lepidosaurs	4.95393	5.39501	0.731781	41	0.0731707	0.560976	0.536585	0.136364	0.333333	NO	3
Citharinidae	Ray-finned Fish	7.67585	9.82672	0.72873	8	0	0.875	0.875	0	NA	NO	0
Samaridae	Ray-finned Fish	2.25955	3.22738	0.725542	28	0	0.0714286	0.0714286	0	NA	NO	0
Tarumaniidae	Ray-finned Fish	2.82043	3.78671	0.72282	1	0	0	0	NA	NA	NO	0
Semnornithidae	Birds	6.81752	8.20216	0.719731	2	0	1	1	0	NA	NO	0
Psilorhynchidae	Ray-finned Fish	2.80369	3.72408	0.71543	28	0.0714286	0.285714	0.285714	0.25	0	NO	2
Trichonotidae	Ray-finned Fish	3.31132	4.49238	0.715001	10	0	0.3	0.3	0	NA	NO	0
Ipnopidae	Ray-finned Fish	8.92134	9.74875	0.714299	30	0	0.833333	0.833333	0	NA	NO	0
Atelidae	Mammals	1.08925	1.57222	0.713071	25	0.64	0.88	0.88	0.727273	0.625	NO	16
Moronidae	Ray-finned Fish	12.5929	13.033	0.713061	6	0	1	1	0	NA	NO	0
Pseudocheiridae	Mammals	4.3108	5.27327	0.711107	20	0.2	0.9	0.9	0.222222	0.5	NO	4
Lebiasinidae	Ray-finned Fish	2.30255	3.37374	0.710188	77	0.025974	0.168831	0.168831	0.153846	0.5	NO	2
Ctenoluciidae	Ray-finned Fish	2.63553	4.58405	0.708303	7	0	0.285714	0.285714	0	NA	NO	0
Pomatostomidae	Birds	13.5873	13.8223	0.70628	5	0	1	1	0	NA	NO	0
Echeneidae	Ray-finned Fish	11.1121	11.3778	0.705508	8	0	0.875	0.875	0	NA	NO	0
Pegasidae	Ray-finned Fish	3.29935	5.0538	0.704165	6	0	0.5	0.5	0	NA	NO	0
Burhinidae	Birds	8.12683	9.27054	0.701864	10	0	1	1	0	NA	NO	0
Kyphosidae	Ray-finned Fish	2.97018	3.8369	0.700676	54	0.0185185	0.222222	0.222222	0.0833333	0	NO	1
Draconettidae	Ray-finned Fish	2.41192	3.16317	0.700289	15	0	0.0666667	0.0666667	0	NA	NO	0
Triacanthodidae	Ray-finned Fish	2.56266	3.97687	0.699295	23	0	0.217391	0.217391	0	NA	NO	0
Alestidae	Ray-finned Fish	3.47818	5.01857	0.696315	119	0.109244	0.764706	0.764706	0.142857	0.384615	NO	13
Heteropneustidae	Ray-finned Fish	4.29577	5.88586	0.694889	5	0	0.4	0.4	0	NA	NO	0
Kraemeriidae	Ray-finned Fish	5.68687	6.72204	0.693206	9	0	0.666667	0.666667	0	NA	NO	0
Dasyuridae	Mammals	5.78203	6.05716	0.691667	76	0.118421	0.921053	0.881579	0.134328	0.888889	NO	9
Sisoridae	Ray-finned Fish	3.0128	3.83457	0.69131	220	0.0954545	0.327273	0.327273	0.291667	0.428571	NO	21
Tetrarogidae	Ray-finned Fish	2.58567	3.85979	0.691072	41	0	0.170732	0.170732	0	NA	NO	0
Bagridae	Ray-finned Fish	3.47726	4.27186	0.690122	235	0.093617	0.442553	0.442553	0.211538	0.318182	NO	22
Amphiliidae	Ray-finned Fish	2.70843	4.17242	0.689819	98	0.112245	0.510204	0.510204	0.22	0.272727	NO	11
Donacobiidae	Birds	16.6635	16.7678	0.68667	1	0	1	1	0	NA	NO	0
Phallostethidae	Ray-finned Fish	2.08809	3.25355	0.68479	23	0.130435	0.391304	0.391304	0.333333	0	NO	3
Pinguipedidae	Ray-finned Fish	2.27483	3.2806	0.68207	90	0	0.0666667	0.0666667	0	NA	NO	0
Uranoscopidae	Ray-finned Fish	2.93921	3.93797	0.676621	53	0	0.264151	0.264151	0	NA	NO	0
Vangidae	Birds	6.18981	6.88142	0.671183	40	0.2	1	1	0.2	0.5	NO	8
Chlopsidae	Ray-finned Fish	3.27244	4.29453	0.670787	25	0	0.36	0.36	0	NA	NO	0
Paralepididae	Ray-finned Fish	7.40719	8.19661	0.669675	58	0	0.793103	0.793103	0	NA	NO	0
Heterenchelyidae	Ray-finned Fish	4.22215	5.20158	0.665835	8	0	0.625	0.625	0	NA	NO	0
Parodontidae	Ray-finned Fish	2.1317	2.93048	0.655591	32	0.03125	0.125	0.125	0.25	0	NO	1
Phalangeridae	Mammals	2.48786	3.20249	0.654595	30	0.3	0.866667	0.866667	0.346154	0.555556	NO	9
Perryenidae	Ray-finned Fish	2.24829	3.11114	0.654348	1	0	0	0	NA	NA	NO	0
Zenkerellidae	Mammals	14.1595	14.1708	0.652809	1	0	1	1	0	NA	NO	0
Leporidae	Mammals	2.45158	2.8864	0.651179	67	0.298507	0.985075	0.910448	0.327869	0.4	NO	20
Chacidae	Ray-finned Fish	4.03647	4.49297	0.651117	4	0.25	0.75	0.75	0.333333	0	NO	1
Cepolidae	Ray-finned Fish	2.87403	3.49462	0.650109	45	0	0.0222222	0.0222222	0	NA	NO	0
Varanidae	Lepidosaurs	4.15331	4.59883	0.6498	81	0.0740741	0.654321	0.567901	0.130435	0.333333	NO	6
Melampittidae	Birds	10.9557	11.6821	0.645058	2	0	1	1	0	NA	NO	0
Rhinocryptidae	Birds	4.8989	5.43771	0.644955	60	0.183333	1	1	0.183333	0.545455	NO	11
Characidae	Ray-finned Fish	2.5428	3.27105	0.64104	1139	0.0272169	0.168569	0.168569	0.161458	0.0645161	NO	31
Syngnathidae	Ray-finned Fish	4.40419	5.21701	0.64037	301	0.0598007	0.601329	0.601329	0.0994475	0.555556	NO	18
Achiridae	Ray-finned Fish	4.45818	5.54474	0.638462	35	0	0.542857	0.542857	0	NA	NO	0
Labridae	Ray-finned Fish	7.34084	7.87412	0.635882	548	0.0364964	0.764599	0.764599	0.0477327	0.4	NO	20
Bombycillidae	Birds	8.25316	8.6119	0.635808	3	0	1	1	0	NA	NO	0
Macropodidae	Mammals	2.65892	2.98342	0.633822	63	0.428571	0.984127	0.984127	0.435484	0.703704	NO	27
Heptapteridae	Ray-finned Fish	1.69849	2.5223	0.628284	214	0.0514019	0.158879	0.158879	0.323529	0.363636	NO	11
Psychrolutidae	Ray-finned Fish	2.4325	3.17617	0.627042	40	0	0.1	0.1	0	NA	NO	0
Coryphaenidae	Ray-finned Fish	9.7915	11.2921	0.625361	2	0	1	1	0	NA	NO	0
Telmatherinidae	Ray-finned Fish	2.29707	3.56829	0.625139	18	0.222222	0.944444	0.944444	0.235294	0.25	NO	4
Grallariidae	Birds	3.71629	4.28833	0.624808	55	0.290909	1	1	0.290909	0.3125	NO	16
Emballonuridae	Mammals	5.10854	5.68205	0.62412	54	0.12963	1	0.87037	0.148936	1	NO	7
Tupaiidae	Mammals	6.31894	6.53499	0.623907	22	0.0909091	1	0.772727	0.117647	0	NO	2
Cottidae	Ray-finned Fish	2.81596	3.57077	0.623746	256	0.0234375	0.265625	0.265625	0.0882353	0.166667	NO	6
Rallidae	Birds	4.14963	4.77268	0.620948	144	0.243056	1	0.986111	0.246479	0.4	NO	35
Dactylopteridae	Ray-finned Fish	9.42858	10.4031	0.618611	7	0	0.714286	0.714286	0	NA	NO	0
Bramidae	Ray-finned Fish	3.51294	4.40153	0.618564	20	0	0.45	0.45	0	NA	NO	0
Pygopodidae	Lepidosaurs	7.04541	7.37608	0.617845	45	0.0888889	1	0.933333	0.0952381	0.25	NO	4
Octodontidae	Mammals	2.28999	2.68984	0.617456	14	0.285714	1	0.785714	0.363636	1	NO	4
Gonorynchidae	Ray-finned Fish	2.0598	3.3331	0.614392	5	0	0.2	0.2	0	NA	NO	0
Cynocephalidae	Mammals	8.86267	11.7546	0.61422	2	0	1	1	0	NA	NO	0
Datnioididae	Ray-finned Fish	1.47976	2.71541	0.61239	5	0.4	1	1	0.4	0	NO	2
Trogonidae	Birds	7.80528	8.10448	0.611203	43	0.0232558	1	1	0.0232558	1	NO	1
Melanopareiidae	Birds	8.92066	9.24467	0.608982	4	0	1	1	0	NA	NO	0
Parabembridae	Ray-finned Fish	1.20938	2.66381	0.608818	2	0	0	0	NA	NA	NO	0
Olyridae	Ray-finned Fish	2.6733	3.68001	0.608625	7	0	0.285714	0.285714	0	NA	NO	0
Prochilodontidae	Ray-finned Fish	2.20252	2.90519	0.605791	21	0.047619	0.0952381	0.0952381	0.5	0	NO	1
Corytophanidae	Lepidosaurs	9.32548	10.0039	0.605333	11	0	0.818182	0.818182	0	NA	NO	0
Columbidae	Birds	3.8524	4.32399	0.604975	353	0.203966	1	0.997167	0.204545	0.388889	NO	72
Maluridae	Birds	7.68959	8.10052	0.601582	29	0.103448	1	1	0.103448	1	NO	3
Talpidae	Mammals	5.06682	5.3817	0.600033	54	0.0740741	0.759259	0.666667	0.111111	0.5	NO	4
Crenuchidae	Ray-finned Fish	2.30615	3.08472	0.596341	93	0	0.129032	0.129032	0	NA	NO	0
Clupeidae	Ray-finned Fish	5.18164	5.97698	0.596197	195	0.102564	0.784615	0.784615	0.130719	0.2	NO	20
Scytalinidae	Ray-finned Fish	1.50967	2.40259	0.595786	1	0	0	0	NA	NA	NO	0
Dussumieriidae	Ray-finned Fish	7.4219	8.13333	0.593896	9	0	0.777778	0.777778	0	NA	NO	0
Caprimulgidae	Birds	6.74753	7.27907	0.593655	98	0.0918367	1	0.979592	0.09375	0.555556	NO	9
Echimyidae	Mammals	2.9999	3.44459	0.593266	89	0.101124	0.988764	0.662921	0.152542	0.888889	NO	9
Myctophidae	Ray-finned Fish	9.49298	9.93318	0.590624	248	0	0.858871	0.858871	0	NA	NO	0
Muraenidae	Ray-finned Fish	7.40965	8.08476	0.588823	202	0	0.757426	0.757426	0	NA	NO	0
Amarsipidae	Ray-finned Fish	1.92551	2.27108	0.586537	1	0	0	0	NA	NA	NO	0
Moridae	Ray-finned Fish	2.06038	2.98075	0.585538	108	0	0.194444	0.194444	0	NA	NO	0
Centropomidae	Ray-finned Fish	10.1013	10.5979	0.584181	12	0	1	1	0	NA	NO	0
Chaenopsidae	Ray-finned Fish	6.66614	7.14463	0.581802	96	0.0625	0.8125	0.8125	0.0769231	0.333333	NO	6
Dasypodidae	Mammals	4.19998	5.06103	0.579891	7	0	1	0.714286	0	NA	NO	0
Tenrecidae	Mammals	5.51207	6.52275	0.578152	31	0.193548	1	0.967742	0.2	0.5	NO	6
Stenostiridae	Birds	11.8766	12.3443	0.576812	9	0	1	1	0	NA	NO	0
Psittacidae	Birds	3.2357	3.58936	0.574099	379	0.282322	1	1	0.282322	0.457944	NO	107
Bembridae	Ray-finned Fish	1.46723	2.54535	0.572195	9	0	0	0	NA	NA	NO	0
Macrouridae	Ray-finned Fish	2.26728	3.09286	0.571355	406	0.00246305	0.150246	0.150246	0.0163934	1	NO	1
Elapidae	Lepidosaurs	4.1783	4.74618	0.571049	377	0.0636605	0.779841	0.67374	0.0944882	0.208333	NO	24
Spalacidae	Mammals	3.11901	3.63579	0.570672	28	0.214286	0.821429	0.714286	0.3	0.666667	NO	6
Macroscelididae	Mammals	6.05182	6.63099	0.569822	20	0.1	0.95	0.75	0.133333	0	NO	2
Cotingidae	Birds	4.41259	4.9291	0.564853	67	0.238806	1	1	0.238806	0.375	NO	16
Ptilonorhynchidae	Birds	10.4175	10.5871	0.564771	20	0	1	1	0	NA	NO	0
Eschmeyeridae	Ray-finned Fish	1.94491	2.55698	0.564384	1	0	0	0	NA	NA	NO	0
Istiophoridae	Ray-finned Fish	2.62444	2.89715	0.562896	11	0.181818	0.545455	0.545455	0.333333	0	NO	2
Bregmacerotidae	Ray-finned Fish	3.09025	4.01793	0.562308	14	0	0.357143	0.357143	0	NA	NO	0
Calyptomenidae	Birds	7.18042	7.69278	0.561291	6	0	1	1	0	NA	NO	0
Alcidae	Birds	4.40491	4.79168	0.560025	24	0.25	1	1	0.25	0.666667	NO	6
Monognathidae	Ray-finned Fish	1.69549	2.69026	0.559336	15	0	0.133333	0.133333	0	NA	NO	0
Cercopithecidae	Mammals	1.28767	1.6133	0.558964	160	0.65	0.9125	0.9	0.722222	0.413462	NO	104
Phalacrocoracidae	Birds	3.08654	3.60133	0.558865	34	0.323529	1	1	0.323529	0.272727	NO	11
Protanguillidae	Ray-finned Fish	1.42457	2.35121	0.558558	1	0	0	0	NA	NA	NO	0
Hyliotidae	Birds	3.10509	3.73815	0.557744	4	0.25	1	1	0.25	1	NO	1
Scorpaenidae	Ray-finned Fish	4.85265	5.50763	0.557634	223	0.00896861	0.61435	0.61435	0.0145985	1	NO	2
Glareolidae	Birds	3.79548	4.78519	0.556496	17	0.117647	1	1	0.117647	0.5	NO	2
Trichechidae	Mammals	1.04617	2.32373	0.554366	3	1	1	1	1	1	NO	3
Bathylutichthyidae	Ray-finned Fish	1.28101	2.02029	0.554136	1	0	0	0	NA	NA	NO	0
Colubridae	Lepidosaurs	3.12554	3.78401	0.554034	1963	0.0748854	0.727967	0.586347	0.127715	0.0952381	NO	147
Sebastidae	Ray-finned Fish	2.04798	2.43668	0.552214	131	0.0152672	0.0610687	0.0610687	0.25	1	NO	2
Epigonidae	Ray-finned Fish	2.5651	3.3096	0.551484	45	0	0.266667	0.266667	0	NA	NO	0
Didelphidae	Mammals	4.99822	5.29704	0.548613	110	0.0727273	0.863636	0.727273	0.1	0.625	NO	8
Ophichthidae	Ray-finned Fish	2.50773	3.25538	0.548206	323	0.00619195	0.291022	0.291022	0.0212766	0	NO	2
Stomiidae	Ray-finned Fish	6.68995	7.27857	0.543047	285	0	0.764912	0.764912	0	NA	NO	0
Pittidae	Birds	4.05733	4.35101	0.541931	48	0.270833	1	0.979167	0.276596	0.307692	NO	13
Irenidae	Birds	5.13158	5.77264	0.541672	3	0	1	1	0	NA	NO	0
Thyropteridae	Mammals	3.68028	4.2778	0.541632	5	0	1	0.4	0	NA	NO	0
Mastacembelidae	Ray-finned Fish	4.11683	4.79944	0.541526	86	0.0581395	0.686047	0.686047	0.0847458	0.4	NO	5
Cnemophilidae	Birds	8.8236	9.35967	0.540437	4	0	1	1	0	NA	NO	0
Galbulidae	Birds	7.77852	8.11658	0.538606	19	0.0526316	1	1	0.0526316	0	NO	1
Cinclidae	Birds	6.34002	6.56806	0.537755	5	0.2	1	1	0.2	1	NO	1
Cracidae	Birds	1.92887	2.04872	0.5349	56	0.392857	1	1	0.392857	0.636364	NO	22
Anostomidae	Ray-finned Fish	1.82399	2.57309	0.533215	158	0.00632911	0.0822785	0.0822785	0.0769231	0	NO	1
Rhodinocichlidae	Birds	10.0408	10.1813	0.531259	1	0	1	1	0	NA	NO	0
Calcariidae	Birds	6.69488	7.41777	0.530928	6	0.166667	1	1	0.166667	1	NO	1
Priacanthidae	Ray-finned Fish	9.11505	9.70881	0.530557	19	0	0.842105	0.842105	0	NA	NO	0
Pteropodidae	Mammals	2.29386	2.82779	0.526994	190	0.368421	0.984211	0.9	0.409357	0.414286	NO	70
Leptoscopidae	Ray-finned Fish	1.34213	2.22273	0.525568	5	0	0	0	NA	NA	NO	0
Oriolidae	Birds	4.64131	4.84051	0.525258	38	0.0789474	1	0.973684	0.0810811	0.333333	NO	3
Plesiopidae	Ray-finned Fish	1.69984	2.66651	0.524883	50	0	0.12	0.12	0	NA	NO	0
Xenisthmidae	Ray-finned Fish	2.40944	3.28866	0.523336	15	0	0.4	0.4	0	NA	NO	0
Bovidae	Mammals	2.41394	2.60652	0.519859	151	0.331126	0.887417	0.874172	0.378788	0.5	NO	50
Strigidae	Birds	4.53084	4.88731	0.519278	222	0.18018	1	0.990991	0.181818	0.35	NO	40
Dentatherinidae	Ray-finned Fish	1.19479	2.06234	0.517463	1	0	0	0	NA	NA	NO	0
Mimidae	Birds	3.74101	3.97604	0.515805	34	0.176471	1	1	0.176471	1	NO	6
Viverridae	Mammals	2.49854	2.69162	0.514701	37	0.27027	0.891892	0.837838	0.322581	0.6	NO	10
Hypopomidae	Ray-finned Fish	1.42527	2.20891	0.512646	46	0	0.0652174	0.0652174	0	NA	NO	0
Pteroclidae	Birds	10.9728	11.4651	0.511351	16	0	1	1	0	NA	NO	0
Phosichthyidae	Ray-finned Fish	9.16819	9.92803	0.510886	24	0	0.958333	0.958333	0	NA	NO	0
Odontophoridae	Birds	4.72681	5.00059	0.506624	35	0.2	1	1	0.2	0.142857	NO	7
Apteronotidae	Ray-finned Fish	1.60175	2.46839	0.505788	89	0.011236	0.123596	0.123596	0.0909091	0	NO	1
Natalidae	Mammals	3.10802	3.45625	0.50315	12	0.25	0.916667	0.833333	0.3	0.666667	NO	3
Synanceiidae	Ray-finned Fish	2.83629	3.79958	0.502444	36	0	0.444444	0.444444	0	NA	NO	0
Apterygidae	Birds	1.39219	2.38893	0.499855	5	0.8	1	1	0.8	0	NO	4
Lorisidae	Mammals	1.25758	1.99852	0.499385	15	0.6	1	1	0.6	0.333333	NO	9
Bathylagidae	Ray-finned Fish	2.17902	3.06502	0.493474	22	0	0.272727	0.272727	0	NA	NO	0
Petroicidae	Birds	7.44374	7.84163	0.493308	53	0.0566038	1	0.981132	0.0576923	0.666667	NO	3
Ziphiidae	Mammals	3.75228	4.38866	0.4926	22	0.0454545	1	0.636364	0.0714286	1	NO	1
Zoarcidae	Ray-finned Fish	1.82159	2.37102	0.489495	304	0	0.0493421	0.0493421	0	NA	NO	0
Cervidae	Mammals	1.89965	2.13678	0.487541	55	0.436364	0.981818	0.8	0.545455	0.5	NO	24
Parascorpididae	Ray-finned Fish	1.11038	2.35146	0.485114	1	0	0	0	NA	NA	NO	0
Cichlidae	Ray-finned Fish	1.85974	2.41023	0.483504	1708	0.151639	0.552108	0.552108	0.274655	0.142857	NO	259
Notoryctidae	Mammals	6.11285	9.0472	0.483327	2	0	1	1	0	NA	NO	0
Erethizontidae	Mammals	2.58209	2.72908	0.480328	17	0.117647	1	0.647059	0.181818	1	NO	2
Myrocongridae	Ray-finned Fish	1.89398	2.61692	0.480087	5	0	0.2	0.2	0	NA	NO	0
Gnathanacanthidae	Ray-finned Fish	1.24891	1.97387	0.478823	1	0	0	0	NA	NA	NO	0
Channichthyidae	Ray-finned Fish	1.71953	2.00588	0.478055	25	0.04	0.04	0.04	1	0	NO	1
Malaconotidae	Birds	5.60707	5.89585	0.471755	48	0.104167	1	1	0.104167	0.6	NO	5
Sittidae	Birds	4.08812	4.49613	0.467365	32	0.1875	1	1	0.1875	0.333333	NO	6
Cuniculidae	Mammals	3.4725	5.48615	0.46655	2	0	1	1	0	NA	NO	0
Achiropsettidae	Ray-finned Fish	1.42042	1.92392	0.465697	4	0	0	0	NA	NA	NO	0
Nicatoridae	Birds	9.58941	9.92527	0.45968	3	0	1	1	0	NA	NO	0
Carangidae	Ray-finned Fish	8.14934	8.35061	0.457986	146	0.0205479	0.965753	0.965753	0.0212766	0.333333	NO	3
Conopophagidae	Birds	7.48074	7.80927	0.457246	12	0	1	1	0	NA	NO	0
Creediidae	Ray-finned Fish	1.88488	2.70655	0.45267	19	0	0.263158	0.263158	0	NA	NO	0
Toxotidae	Ray-finned Fish	4.77412	5.1204	0.446959	7	0	0.857143	0.857143	0	NA	NO	0
Congridae	Ray-finned Fish	4.45528	5.21222	0.446531	195	0	0.758974	0.758974	0	NA	NO	0
Alcedinidae	Birds	3.6163	3.87965	0.444666	120	0.141667	1	0.991667	0.142857	0.235294	NO	17
Calomyscidae	Mammals	3.98061	4.60132	0.444312	8	0	1	0.75	0	NA	NO	0
Turdidae	Birds	4.48039	4.63157	0.441844	177	0.0960452	1	1	0.0960452	0.647059	NO	17
Climacteridae	Birds	8.6851	8.78052	0.439974	7	0	1	1	0	NA	NO	0
Acanthuridae	Ray-finned Fish	5.89658	6.0755	0.439752	84	0.0119048	0.869048	0.869048	0.0136986	0	NO	1
Pycnonotidae	Birds	4.66709	4.88048	0.439002	158	0.101266	1	0.993671	0.101911	0.25	NO	16
Casuariidae	Birds	8.13304	8.32396	0.438159	4	0	1	1	0	NA	NO	0
Hipposideridae	Mammals	2.94956	3.28129	0.437846	90	0.244444	0.955556	0.811111	0.30137	0.227273	NO	22
Hirundinidae	Birds	4.192	4.57434	0.437338	89	0.0786517	1	0.977528	0.0804598	0.714286	NO	7
Phocidae	Mammals	2.27337	2.39974	0.433965	18	0.222222	1	1	0.222222	0.75	NO	4
Schilbeidae	Ray-finned Fish	2.89429	3.96839	0.429836	65	0.0461538	0.692308	0.692308	0.0666667	0.333333	NO	3
Phocoenidae	Mammals	1.40826	1.87984	0.429636	7	0.428571	1	1	0.428571	1	NO	3
Alepocephalidae	Ray-finned Fish	2.15601	2.75972	0.428727	98	0	0.357143	0.357143	0	NA	NO	0
Stephanoberycidae	Ray-finned Fish	3.1768	4.29933	0.428591	4	0	0.75	0.75	0	NA	NO	0
Alaudidae	Birds	3.8267	4.17188	0.425338	92	0.0869565	1	0.978261	0.0888889	0.625	NO	8
Mormoopidae	Mammals	4.56361	5.06433	0.424615	17	0.0588235	0.647059	0.647059	0.0909091	0	NO	1
Pachycephalidae	Birds	5.42892	5.68722	0.420146	52	0.0384615	1	1	0.0384615	0.5	NO	2
Microstomatidae	Ray-finned Fish	1.78196	2.5359	0.420006	20	0	0.25	0.25	0	NA	NO	0
Acrocephalidae	Birds	2.9365	3.12394	0.415964	54	0.296296	1	0.981481	0.301887	0.5	NO	16
Pristigasteridae	Ray-finned Fish	3.96877	4.70714	0.413387	38	0.0263158	0.684211	0.684211	0.0384615	0	NO	1
Salmonidae	Ray-finned Fish	1.23592	1.53872	0.411731	213	0.305164	0.516432	0.516432	0.590909	0.0615385	NO	65
Apodidae	Birds	5.46386	5.84062	0.410391	96	0.0625	1	0.9375	0.0666667	0.333333	NO	6
Phasianidae	Birds	2.86927	3.16111	0.408641	187	0.213904	1	1	0.213904	0.575	NO	40
Labrisomidae	Ray-finned Fish	4.58789	5.20361	0.408434	121	0.0743802	0.826446	0.826446	0.09	0.111111	NO	9
Serranidae	Ray-finned Fish	3.36152	4.13583	0.406441	550	0.0436364	0.681818	0.681818	0.064	0.166667	NO	24
Nemacheilidae	Ray-finned Fish	1.44691	1.94845	0.405516	696	0.122126	0.316092	0.316092	0.386364	0.0235294	NO	85
Lutjanidae	Ray-finned Fish	5.20111	5.59816	0.405349	113	0.0265487	0.80531	0.80531	0.032967	0	NO	3
Clariidae	Ray-finned Fish	2.11896	2.63911	0.404702	116	0.198276	0.732759	0.732759	0.270588	0.0869565	NO	23
Loricariidae	Ray-finned Fish	1.4081	1.96499	0.403753	955	0.0240838	0.134031	0.134031	0.179688	0	NO	23
Rhinopomatidae	Mammals	1.77723	2.31712	0.403047	6	0.166667	1	0.833333	0.2	1	NO	1
Prionodontidae	Mammals	6.53298	7.21054	0.402224	2	0	1	1	0	NA	NO	0
Dicruridae	Birds	4.53226	4.66369	0.402064	26	0.115385	1	1	0.115385	0.666667	NO	3
Machaerirhynchidae	Birds	8.22638	9.23355	0.402015	2	0	1	1	0	NA	NO	0
Omosudidae	Ray-finned Fish	7.24422	9.08944	0.401941	1	0	1	1	0	NA	NO	0
Suidae	Mammals	1.86682	2.08999	0.401323	17	0.529412	1	1	0.529412	0.555556	NO	9
Capitonidae	Birds	3.56922	3.77891	0.400463	18	0.166667	1	1	0.166667	0.666667	NO	3
Balaenopteridae	Mammals	2.4146	2.49512	0.400358	8	0.375	1	0.875	0.428571	0.666667	NO	3
Banjosidae	Ray-finned Fish	0.838078	1.92142	0.400235	3	0	0	0	NA	NA	NO	0
Diretmidae	Ray-finned Fish	11.0094	11.26	0.399834	4	0	1	1	0	NA	NO	0
Buphagidae	Birds	6.47175	7.46029	0.397351	2	0	1	1	0	NA	NO	0
Exocoetidae	Ray-finned Fish	2.48049	2.8633	0.396859	67	0	0.41791	0.41791	0	NA	NO	0
Emmelichthyidae	Ray-finned Fish	2.05674	2.76416	0.396503	16	0	0.3125	0.3125	0	NA	NO	0
Momotidae	Birds	6.44326	6.80709	0.395461	14	0.0714286	1	1	0.0714286	1	NO	1
Trichomycteridae	Ray-finned Fish	1.37584	1.94191	0.395329	288	0.0277778	0.145833	0.145833	0.190476	0	NO	8
Fringillidae	Birds	2.58414	2.83629	0.393983	210	0.171429	1	0.995238	0.172249	0.444444	NO	36
Neobalaenidae	Mammals	7.43312	7.46145	0.389616	1	0	1	1	0	NA	NO	0
Mustelidae	Mammals	2.90996	3.02492	0.389003	63	0.222222	0.968254	0.952381	0.233333	0.5	NO	14
Trachichthyidae	Ray-finned Fish	3.49735	3.93744	0.387282	48	0	0.645833	0.645833	0	NA	NO	0
Bothidae	Ray-finned Fish	2.81957	3.36549	0.387133	164	0	0.573171	0.573171	0	NA	NO	0
Cricetidae	Mammals	2.7264	3.00441	0.385989	782	0.112532	0.865729	0.757033	0.148649	0.534091	NO	88
Phyllostomidae	Mammals	3.46059	3.77024	0.383381	215	0.0651163	0.944186	0.776744	0.0838323	0.5	NO	14
Megalonychidae	Mammals	6.27609	7.3728	0.383335	2	0	1	1	0	NA	NO	0
Nesospingidae	Birds	8.10541	8.12573	0.382789	1	0	1	1	0	NA	NO	0
Grammatidae	Ray-finned Fish	3.26442	4.27673	0.382671	17	0	0.588235	0.588235	0	NA	NO	0
Claroteidae	Ray-finned Fish	2.24576	2.77052	0.382621	82	0.195122	0.719512	0.719512	0.271186	0.0625	NO	16
Notosudidae	Ray-finned Fish	8.13119	8.59069	0.382586	17	0	1	1	0	NA	NO	0
Lophiidae	Ray-finned Fish	4.53287	4.99493	0.381803	28	0	0.785714	0.785714	0	NA	NO	0
Liparidae	Ray-finned Fish	1.29943	1.78126	0.381691	410	0	0.00731707	0.00731707	0	NA	NO	0
Dicaeidae	Birds	5.67279	5.95988	0.379443	54	0.0555556	1	1	0.0555556	0.333333	NO	3
Emberizidae	Birds	3.82426	3.92985	0.378977	44	0.0909091	1	1	0.0909091	1	NO	4
Platytroctidae	Ray-finned Fish	2.23119	2.80621	0.378205	39	0	0.487179	0.487179	0	NA	NO	0
Kneriidae	Ray-finned Fish	2.19528	2.75133	0.376242	30	0.133333	0.633333	0.633333	0.210526	0	NO	4
Pomacanthidae	Ray-finned Fish	6.24047	6.42817	0.374643	91	0.021978	0.89011	0.89011	0.0246914	0	NO	2
Pseudochromidae	Ray-finned Fish	1.88497	2.44641	0.374416	152	0.00657895	0.421053	0.421053	0.015625	0	NO	1
Corvidae	Birds	3.25707	3.47233	0.372742	131	0.137405	1	1	0.137405	0.333333	NO	18
Sminthidae	Mammals	1.43137	1.80796	0.371394	15	0.266667	1	0.866667	0.307692	0.25	NO	4
Argentinidae	Ray-finned Fish	1.76017	2.40809	0.370886	27	0	0.259259	0.259259	0	NA	NO	0
Callorhinchidae	Chondrichthyes	6.5353	7.03023	0.368346	3	0.333333	1	1	0.333333	0	NO	1
Soricidae	Mammals	2.0226	2.41529	0.36687	447	0.154362	0.932886	0.702461	0.219745	0.289855	NO	69
Rhinonycteridae	Mammals	4.27225	4.56163	0.366474	9	0.111111	0.888889	0.666667	0.166667	0	NO	1
Monacanthidae	Ray-finned Fish	4.04101	4.53719	0.36523	107	0.0186916	0.747664	0.747664	0.025	0	NO	2
Anomalopidae	Ray-finned Fish	1.56822	2.248	0.365146	9	0	0.444444	0.444444	0	NA	NO	0
Callanthiidae	Ray-finned Fish	1.03664	1.67011	0.363724	16	0	0.0625	0.0625	0	NA	NO	0
Curimatidae	Ray-finned Fish	1.08864	1.68876	0.361222	106	0.00943396	0.113208	0.113208	0.0833333	0	NO	1
Evermannellidae	Ray-finned Fish	7.8852	8.35952	0.361174	8	0	1	1	0	NA	NO	0
Tetrabrachiidae	Ray-finned Fish	5.24019	6.46758	0.360853	2	0	1	1	0	NA	NO	0
Polymixiidae	Ray-finned Fish	3.85393	5.12569	0.357507	10	0	0.7	0.7	0	NA	NO	0
Tetraodontidae	Ray-finned Fish	3.77826	4.3341	0.356116	200	0.055	0.765	0.765	0.0718954	0.0909091	NO	11
Falconidae	Birds	4.48679	4.70859	0.353815	64	0.109375	1	1	0.109375	0.142857	NO	7
Opistognathidae	Ray-finned Fish	1.58389	2.08997	0.353753	83	0	0.337349	0.337349	0	NA	NO	0
Carapidae	Ray-finned Fish	2.38553	2.95952	0.353642	36	0	0.638889	0.638889	0	NA	NO	0
Anomaluridae	Mammals	4.33108	4.91758	0.350562	6	0	1	0.833333	0	NA	NO	0
Troglodytidae	Birds	4.24544	4.42012	0.349975	93	0.0860215	1	1	0.0860215	0.375	NO	8
Muscicapidae	Birds	4.20564	4.41989	0.349958	335	0.0985075	1	0.997015	0.0988024	0.515152	NO	33
Vespertilionidae	Mammals	2.38148	2.79832	0.348179	504	0.105159	0.886905	0.674603	0.155882	0.339623	NO	53
Castoridae	Mammals	4.05665	6.62662	0.347807	2	0	1	1	0	NA	NO	0
Heteromyidae	Mammals	3.01952	3.2221	0.347169	66	0.151515	0.954545	0.939394	0.16129	0.7	NO	10
Caviidae	Mammals	2.87527	3.38922	0.346767	21	0.047619	0.952381	0.714286	0.0666667	1	NO	1
Phoeniculidae	Birds	7.56182	7.95604	0.34436	8	0	1	1	0	NA	NO	0
Scaridae	Ray-finned Fish	4.62626	4.87243	0.344029	100	0.02	0.87	0.87	0.0229885	0	NO	2
Numididae	Birds	4.70126	4.94347	0.342937	8	0.125	1	1	0.125	0	NO	1
Meliphagidae	Birds	4.97232	5.2062	0.341775	192	0.0520833	1	0.994792	0.052356	0.5	NO	10
Muridae	Mammals	2.3142	2.72658	0.341724	821	0.151035	0.930572	0.736906	0.204959	0.25	NO	124
Ochotonidae	Mammals	3.27104	3.48594	0.34127	30	0.133333	0.966667	0.933333	0.142857	0.75	NO	4
Upupidae	Birds	5.32568	6.99967	0.341201	2	0	1	1	0	NA	NO	0
Campephagidae	Birds	4.18565	4.33963	0.34057	99	0.0909091	1	0.979798	0.0927835	0.111111	NO	9
Melanocharitidae	Birds	7.37212	7.60627	0.339113	11	0	1	1	0	NA	NO	0
Paridae	Birds	5.95144	6.1015	0.338648	61	0.0327869	1	1	0.0327869	0	NO	2
Thamnophilidae	Birds	4.01879	4.25286	0.337713	242	0.128099	1	1	0.128099	0.258065	NO	31
Cheimarrichthyidae	Ray-finned Fish	0.642449	1.42445	0.337488	1	1	1	1	1	0	NO	1
Aploactinidae	Ray-finned Fish	0.94688	1.51935	0.336377	48	0	0.0833333	0.0833333	0	NA	NO	0
Lobotidae	Ray-finned Fish	5.4603	5.84763	0.335317	2	0	1	1	0	NA	NO	0
Holocentridae	Ray-finned Fish	4.26132	4.6217	0.33446	86	0.0232558	0.709302	0.709302	0.0327869	0	NO	2
Rheidae	Birds	2.97233	3.55463	0.334167	3	0	1	1	0	NA	NO	0
Mitrospingidae	Birds	6.27568	6.5266	0.333617	4	0	1	1	0	NA	NO	0
Monarchidae	Birds	1.90749	2.12916	0.333421	104	0.221154	1	1	0.221154	0.304348	NO	23
Sturnidae	Birds	3.71785	3.85817	0.331611	123	0.130081	1	1	0.130081	0.25	NO	16
Austroglanididae	Ray-finned Fish	1.13968	1.59244	0.330993	3	0.333333	1	1	0.333333	0	NO	1
Tityridae	Birds	4.75748	5.00132	0.330507	49	0.0816327	1	0.979592	0.0833333	0.25	NO	4
Procyonidae	Mammals	3.28783	3.44125	0.33023	14	0.142857	1	1	0.142857	0.5	NO	2
Bucconidae	Birds	5.61337	5.99483	0.329416	38	0.0263158	1	1	0.0263158	0	NO	1
Elopidae	Ray-finned Fish	2.41514	2.73808	0.328658	7	0	0.428571	0.428571	0	NA	NO	0
Acanthizidae	Birds	6.12585	6.27445	0.328451	64	0.015625	1	1	0.015625	0	NO	1
Motacillidae	Birds	3.31867	3.55438	0.328183	66	0.121212	1	0.984848	0.123077	0.25	NO	8
Aulostomidae	Ray-finned Fish	5.53043	5.79311	0.326357	3	0	1	1	0	NA	NO	0
Scomberesocidae	Ray-finned Fish	1.57824	1.64539	0.326136	5	0	0.4	0.4	0	NA	NO	0
Tragulidae	Mammals	2.9906	3.39843	0.322483	10	0.1	1	0.7	0.142857	0	NO	1
Gliridae	Mammals	2.8782	3.44701	0.321829	29	0.0689655	1	0.62069	0.111111	0	NO	2
Remizidae	Birds	6.39333	6.60376	0.320392	11	0	1	1	0	NA	NO	0
Geomyidae	Mammals	2.43512	2.55553	0.320257	41	0.0731707	0.853659	0.853659	0.0857143	1	NO	3
Parulidae	Birds	2.71598	2.79776	0.318858	122	0.114754	1	1	0.114754	0.357143	NO	14
Mochokidae	Ray-finned Fish	2.12967	2.41324	0.318255	221	0.167421	0.710407	0.710407	0.235669	0.0810811	NO	37
Chaetodontidae	Ray-finned Fish	4.41517	4.61857	0.318158	131	0	0.908397	0.908397	0	NA	NO	0
Indicatoridae	Birds	4.42195	4.77497	0.31599	16	0	1	1	0	NA	NO	0
Malapteruridae	Ray-finned Fish	2.69338	2.98022	0.313033	21	0.0952381	0.714286	0.714286	0.133333	0	NO	2
Lophichthyidae	Ray-finned Fish	4.4382	7.38507	0.309441	1	0	1	1	0	NA	NO	0
Felidae	Mammals	1.61278	1.7663	0.309364	42	0.428571	0.904762	0.904762	0.473684	0.555556	NO	18
Otariidae	Mammals	1.32007	1.47605	0.307633	15	0.333333	1	1	0.333333	0.6	NO	5
Odacidae	Ray-finned Fish	6.07277	6.57136	0.305696	12	0	0.916667	0.916667	0	NA	NO	0
Liolaemidae	Lepidosaurs	1.94824	2.19649	0.305299	318	0.147799	0.877358	0.814465	0.181467	0.0212766	NO	47
Pedetidae	Mammals	4.1587	5.97141	0.304809	2	0	1	1	0	NA	NO	0
Aegithinidae	Birds	4.42257	4.79884	0.304629	4	0	1	1	0	NA	NO	0
Cardinalidae	Birds	4.96679	5.09425	0.304473	52	0.0192308	1	1	0.0192308	1	NO	1
Clinidae	Ray-finned Fish	3.7492	4.03509	0.29549	88	0.0340909	0.920455	0.920455	0.037037	0.333333	NO	3
Trochilidae	Birds	3.2738	3.49254	0.294755	366	0.10929	1	0.997268	0.109589	0.425	NO	40
Nycteridae	Mammals	2.21364	2.80355	0.293864	16	0.0625	1	0.75	0.0833333	0	NO	1
Kogiidae	Mammals	3.54492	5.57094	0.292752	2	0	1	1	0	NA	NO	0
Ammodytidae	Ray-finned Fish	0.990047	1.43463	0.289409	31	0	0.16129	0.16129	0	NA	NO	0
Eurypharyngidae	Ray-finned Fish	3.93932	6.25283	0.286726	1	0	1	1	0	NA	NO	0
Pellorneidae	Birds	3.16426	3.36316	0.286122	64	0.140625	1	0.984375	0.142857	0	NO	9
Dipodidae	Mammals	2.9928	3.15295	0.286076	36	0	0.916667	0.75	0	NA	NO	0
Canidae	Mammals	1.6783	1.87998	0.285941	38	0.131579	0.947368	0.947368	0.138889	0.8	NO	5
Platysteiridae	Birds	4.38292	4.55583	0.285889	34	0.0294118	1	1	0.0294118	1	NO	1
Gobiesocidae	Ray-finned Fish	1.47782	1.85255	0.284656	168	0.0654762	0.458333	0.458333	0.142857	0	NO	11
Lepisosteidae	Ray-finned Fish	3.07739	3.73798	0.283547	7	0	0.857143	0.857143	0	NA	NO	0
Icteridae	Birds	2.9267	3.04757	0.280402	114	0.131579	1	1	0.131579	0.4	NO	15
Paradisaeidae	Birds	3.88289	3.98414	0.279876	41	0.0487805	1	1	0.0487805	1	NO	2
Sciuridae	Mammals	2.36863	2.63377	0.275117	298	0.100671	0.939597	0.825503	0.121951	0.5	NO	30
Siganidae	Ray-finned Fish	4.018	4.11209	0.274212	29	0.0344828	0.896552	0.896552	0.0384615	0	NO	1
Hyaenidae	Mammals	3.15768	3.35695	0.270744	4	0	1	1	0	NA	NO	0
Anatidae	Birds	2.66333	2.75994	0.270589	165	0.187879	1	1	0.187879	0.354839	NO	31
Meropidae	Birds	5.08423	5.26558	0.268571	31	0	1	1	0	NA	NO	0
Certhiidae	Birds	4.8144	4.99906	0.267044	9	0	1	1	0	NA	NO	0
Laniidae	Birds	3.241	3.58013	0.267037	33	0.0606061	1	1	0.0606061	1	NO	2
Cebidae	Mammals	0.892989	1.17152	0.266197	89	0.393258	0.977528	0.94382	0.416667	0.2	NO	35
Laridae	Birds	2.16054	2.30842	0.264079	100	0.15	1	1	0.15	0.733333	NO	15
Anotopteridae	Ray-finned Fish	5.67266	5.95784	0.262387	3	0	1	1	0	NA	NO	0
Coraciidae	Birds	4.8075	4.95881	0.261693	13	0	1	1	0	NA	NO	0
Locustellidae	Birds	2.78133	2.99559	0.259514	63	0.15873	1	1	0.15873	0.1	NO	10
Pantodontidae	Ray-finned Fish	1.31623	5.34027	0.259023	1	0	1	1	0	NA	NO	0
Ophidiidae	Ray-finned Fish	2.20922	2.5579	0.258911	258	0	0.709302	0.709302	0	NA	NO	0
Dactyloscopidae	Ray-finned Fish	2.8346	3.12394	0.258247	48	0.104167	0.895833	0.895833	0.116279	0	NO	5
Paramythiidae	Birds	5.558	5.81608	0.255946	3	0	1	1	0	NA	NO	0
Gymnarchidae	Ray-finned Fish	1.31623	5.46539	0.255805	1	0	1	1	0	NA	NO	0
Harpagiferidae	Ray-finned Fish	1.0487	1.25845	0.255074	11	0	0.0909091	0.0909091	0	NA	NO	0
Sylviidae	Birds	3.79894	3.9506	0.25349	69	0.0869565	1	1	0.0869565	0.166667	NO	6
Tyrannidae	Birds	3.42102	3.61463	0.253471	449	0.0690423	1	1	0.0690423	0.258065	NO	31
Neosittidae	Birds	5.26115	5.79761	0.253391	3	0	1	1	0	NA	NO	0
Blenniidae	Ray-finned Fish	3.51421	3.77801	0.252301	401	0.0648379	0.917706	0.917706	0.0706522	0.0384615	NO	26
Caesionidae	Ray-finned Fish	5.38721	5.56846	0.249426	23	0	0.826087	0.826087	0	NA	NO	0
Formicariidae	Birds	4.54387	4.77024	0.246527	12	0	1	1	0	NA	NO	0
Mormyridae	Ray-finned Fish	1.94588	2.28151	0.242823	229	0.0742358	0.641921	0.641921	0.115646	0	NO	17
Bythitidae	Ray-finned Fish	1.23934	1.55638	0.242753	212	0.0518868	0.599057	0.599057	0.0866142	0.272727	NO	11
Distichodontidae	Ray-finned Fish	2.3744	2.7015	0.241634	102	0.0882353	0.764706	0.764706	0.115385	0	NO	9
Triglidae	Ray-finned Fish	1.41482	1.76167	0.241275	125	0.016	0.408	0.408	0.0392157	0	NO	2
Plectrogeniidae	Ray-finned Fish	1.29749	2.00274	0.23828	2	0	0.5	0.5	0	NA	NO	0
Dasyproctidae	Mammals	1.34148	1.62417	0.234918	15	0.133333	1	0.666667	0.2	0	NO	2
Astroblepidae	Ray-finned Fish	0.790182	1.14664	0.232192	67	0.0895522	0.343284	0.343284	0.26087	0	NO	6
Tripterygiidae	Ray-finned Fish	3.15055	3.34547	0.230697	178	0.0393258	0.910112	0.910112	0.0432099	0	NO	7
Molossidae	Mammals	1.80247	2.10503	0.23054	125	0.096	0.92	0.728	0.131868	0.0833333	NO	12
Promeropidae	Birds	1.31145	3.14111	0.230454	2	0	1	1	0	NA	NO	0
Scotocercidae	Birds	4.42746	4.64026	0.22894	37	0	1	1	0	NA	NO	0
Cisticolidae	Birds	2.77447	2.99233	0.227241	161	0.068323	1	0.975155	0.0700637	0.272727	NO	11
Eschrichtiidae	Mammals	4.05361	4.11181	0.226372	1	0	1	1	0	NA	NO	0
Miniopteridae	Mammals	1.49907	1.7165	0.224596	38	0.0789474	0.789474	0.578947	0.136364	0	NO	3
Passerellidae	Birds	2.76667	2.87633	0.224537	146	0.0821918	1	1	0.0821918	0.166667	NO	12
Ramphastidae	Birds	2.49957	2.62398	0.223619	50	0.12	1	1	0.12	0.333333	NO	6
Bathyergidae	Mammals	2.46219	2.6437	0.22268	21	0.0952381	0.809524	0.666667	0.142857	0	NO	2
Rhinolophidae	Mammals	1.41365	1.6284	0.222304	103	0.174757	0.883495	0.757282	0.230769	0.0555556	NO	18
Procaviidae	Mammals	3.51847	3.74268	0.221911	5	0	1	1	0	NA	NO	0
Bathysauroididae	Ray-finned Fish	4.28864	4.89832	0.218789	1	0	1	1	0	NA	NO	0
Passeridae	Birds	4.27459	4.45659	0.217659	43	0.0465116	1	1	0.0465116	0	NO	2
Hystricidae	Mammals	3.75211	3.80935	0.217478	11	0.0909091	1	1	0.0909091	0	NO	1
Nectariniidae	Birds	3.34529	3.58274	0.21655	147	0.047619	1	1	0.047619	0.142857	NO	7
Rhipiduridae	Birds	3.63622	3.76666	0.215025	62	0.0483871	1	1	0.0483871	0	NO	3
Thraupidae	Birds	2.54498	2.68679	0.211795	408	0.115196	1	1	0.115196	0.276596	NO	47
Lybiidae	Birds	3.34564	3.48818	0.208057	52	0.0576923	1	0.980769	0.0588235	0	NO	3
Cinclosomatidae	Birds	4.57756	4.7866	0.206643	11	0	1	1	0	NA	NO	0
Solenostomidae	Ray-finned Fish	1.10261	1.61191	0.206042	6	0	0.5	0.5	0	NA	NO	0
Picidae	Birds	2.53078	2.67418	0.204704	253	0.0711462	1	1	0.0711462	0.166667	NO	18
Ctenomyidae	Mammals	0.772414	0.94817	0.204017	69	0.202899	0.855072	0.507246	0.4	0.0714286	NO	14
Chaunacidae	Ray-finned Fish	2.80389	3.01645	0.203406	26	0	0.846154	0.846154	0	NA	NO	0
Hepsetidae	Ray-finned Fish	2.15655	3.09852	0.202871	6	0	0.833333	0.833333	0	NA	NO	0
Prunellidae	Birds	4.44021	4.58831	0.202285	12	0	1	1	0	NA	NO	0
Phylloscopidae	Birds	3.21758	3.32534	0.20209	79	0.0632911	1	1	0.0632911	0.2	NO	5
Ctenodactylidae	Mammals	2.27014	2.69587	0.201478	5	0	1	0.8	0	NA	NO	0
Leiotrichidae	Birds	1.90362	2.07861	0.199409	148	0.128378	1	1	0.128378	0.157895	NO	19
Abyssocottidae	Ray-finned Fish	1.09177	1.33988	0.198909	24	0.125	0.833333	0.833333	0.15	0	NO	3
Noctilionidae	Mammals	2.03623	3.87231	0.195768	2	0	1	1	0	NA	NO	0
Zapodidae	Mammals	1.84195	2.09894	0.194879	12	0	0.416667	0.416667	0	NA	NO	0
Chionidae	Birds	3.00517	4.03327	0.194083	2	0	1	1	0	NA	NO	0
Aegithalidae	Birds	4.28913	4.42654	0.193985	14	0	1	1	0	NA	NO	0
Thinocoridae	Birds	2.32038	3.80801	0.192554	4	0	1	1	0	NA	NO	0
Delphinidae	Mammals	1.26093	1.3593	0.192367	40	0.2	0.95	0.9	0.222222	0.5	NO	8
Mephitidae	Mammals	2.22515	2.47422	0.190376	12	0.166667	0.916667	0.916667	0.181818	0	NO	2
Pitheciidae	Mammals	0.778684	1.02851	0.190146	57	0.315789	0.982456	0.824561	0.382979	0	NO	18
Opisthoproctidae	Ray-finned Fish	0.765653	1.14773	0.189975	21	0	0.333333	0.333333	0	NA	NO	0
Ateleopodidae	Ray-finned Fish	0.939256	1.21989	0.189324	13	0	0.461538	0.461538	0	NA	NO	0
Artamidae	Birds	3.76482	4.02599	0.189116	24	0	1	1	0	NA	NO	0
Cetomimidae	Ray-finned Fish	0.813856	1.19969	0.186283	30	0	0.433333	0.433333	0	NA	NO	0
Furnariidae	Birds	2.11109	2.23747	0.183374	329	0.100304	1	1	0.100304	0.181818	NO	33
Teretistridae	Birds	3.28252	4.01378	0.183146	2	0	1	1	0	NA	NO	0
Timaliidae	Birds	2.03161	2.20234	0.181799	54	0.12963	1	1	0.12963	0	NO	7
Melanocetidae	Ray-finned Fish	1.4725	1.8445	0.180537	6	0	0.666667	0.666667	0	NA	NO	0
Herpestidae	Mammals	2.26419	2.33785	0.179513	36	0.0555556	0.972222	0.944444	0.0588235	0.5	NO	2
Phractolaemidae	Ray-finned Fish	2.00343	3.54941	0.177048	1	0	1	1	0	NA	NO	0
Pipridae	Birds	2.24355	2.39054	0.176583	53	0.0943396	1	1	0.0943396	0.2	NO	5
Polioptilidae	Birds	3.51595	3.61429	0.175543	15	0	1	1	0	NA	NO	0
Estrildidae	Birds	2.46527	2.60026	0.172949	141	0.0425532	1	0.992908	0.0428571	0.333333	NO	6
Vireonidae	Birds	3.1084	3.24592	0.172926	65	0.0153846	1	1	0.0153846	0	NO	1
Ogcocephalidae	Ray-finned Fish	2.07937	2.30252	0.172104	78	0	0.807692	0.807692	0	NA	NO	0
Haematopodidae	Birds	2.26034	2.39605	0.172075	10	0.1	1	1	0.1	0	NO	1
Zosteropidae	Birds	1.33608	1.43715	0.168981	136	0.161765	1	1	0.161765	0.0454545	NO	22
Aracanidae	Ray-finned Fish	2.44575	2.65501	0.16866	12	0	0.916667	0.916667	0	NA	NO	0
Aphyonidae	Ray-finned Fish	0.613391	0.927708	0.167241	24	0	0.25	0.25	0	NA	NO	0
Megalaimidae	Birds	2.73953	2.88784	0.163164	35	0	1	1	0	NA	NO	0
Thryonomyidae	Mammals	1.90303	3.17883	0.162684	2	0	1	1	0	NA	NO	0
Parabrotulidae	Ray-finned Fish	0.656299	0.99414	0.159035	3	0	0.333333	0.333333	0	NA	NO	0
Artedidraconidae	Ray-finned Fish	0.770798	0.842865	0.158982	30	0	0.0666667	0.0666667	0	NA	NO	0
Leptochilichthyidae	Ray-finned Fish	1.23642	1.6281	0.158435	3	0	0.666667	0.666667	0	NA	NO	0
Myzopodidae	Mammals	0.657274	3.37591	0.156732	2	0	1	1	0	NA	NO	0
Galagidae	Mammals	1.45147	1.69037	0.154926	20	0.1	0.95	0.9	0.111111	0	NO	2
Ostracoberycidae	Ray-finned Fish	1.28101	1.64768	0.151413	3	0	0.666667	0.666667	0	NA	NO	0
Cottocomephoridae	Ray-finned Fish	2.7057	2.85747	0.15097	9	0	0.888889	0.888889	0	NA	NO	0
Monodontidae	Mammals	2.6674	2.87659	0.146814	2	0	1	1	0	NA	NO	0
Schindleriidae	Ray-finned Fish	1.27689	1.47664	0.145215	5	0	0.4	0.4	0	NA	NO	0
Pnoepygidae	Birds	3.23865	3.43952	0.142523	4	0	1	1	0	NA	NO	0
Ploceidae	Birds	1.62542	1.75259	0.141893	124	0.104839	1	0.983871	0.106557	0	NO	13
Chiasmodontidae	Ray-finned Fish	2.09235	2.37586	0.141184	32	0	0.84375	0.84375	0	NA	NO	0
Caristiidae	Ray-finned Fish	0.642418	0.868316	0.139332	19	0	0.210526	0.210526	0	NA	NO	0
Gigantactinidae	Ray-finned Fish	0.999389	1.29481	0.133151	23	0	0.652174	0.652174	0	NA	NO	0
Cyematidae	Ray-finned Fish	1.99853	2.79789	0.129378	2	0	1	1	0	NA	NO	0
Himantolophidae	Ray-finned Fish	0.601608	0.762946	0.125772	22	0	0.454545	0.454545	0	NA	NO	0
Spindalidae	Birds	2.72111	2.81478	0.122784	4	0	1	1	0	NA	NO	0
Barbourisiidae	Ray-finned Fish	1.97581	2.89575	0.121513	1	0	1	1	0	NA	NO	0
Scombrolabracidae	Ray-finned Fish	1.83349	2.54518	0.110562	1	0	1	1	0	NA	NO	0
Falcunculidae	Birds	2.05994	2.31432	0.105737	3	0	1	1	0	NA	NO	0
Hispidoberycidae	Ray-finned Fish	1.76811	2.20026	0.0993345	1	0	1	1	0	NA	NO	0
Viduidae	Birds	1.99823	2.03371	0.0968396	20	0	1	1	0	NA	NO	0
Comephoridae	Ray-finned Fish	1.11397	1.63436	0.0941791	2	0	1	1	0	NA	NO	0
Gibberichthyidae	Ray-finned Fish	1.72662	2.13672	0.0895016	2	0	1	1	0	NA	NO	0
Stercorariidae	Birds	1.48847	1.55549	0.0836098	7	0	1	1	0	NA	NO	0
Elachuridae	Birds	1.45531	1.80187	0.0781206	1	0	1	1	0	NA	NO	0
Veliferidae	Ray-finned Fish	0.686935	1.56832	0.0773322	2	0	1	1	0	NA	NO	0
Caulophrynidae	Ray-finned Fish	0.342912	0.431233	0.0653324	5	0	0.4	0.4	0	NA	NO	0
Cistugidae	Mammals	0.682598	1.27369	0.0596966	2	0	1	1	0	NA	NO	0
Linophrynidae	Ray-finned Fish	0.31214	0.425313	0.0550172	27	0	0.555556	0.555556	0	NA	NO	0
Thaumatichthyidae	Ray-finned Fish	0.286707	0.401425	0.053694	8	0	0.5	0.5	0	NA	NO	0
Oneirodidae	Ray-finned Fish	0.334269	0.42098	0.0535579	64	0	0.640625	0.640625	0	NA	NO	0
Centrophrynidae	Ray-finned Fish	0.328797	0.429566	0.0190838	1	0	1	1	0	NA	NO	0
Neoceratiidae	Ray-finned Fish	0.319294	0.422295	0.0189845	1	0	1	1	0	NA	NO	0
Diceratiidae	Ray-finned Fish	0.311957	0.348152	0.0162819	6	0	1	1	0	NA	NO	0
